# Supplementary material for: The elusive active species in nickel(ii)-mediated oxidations of hydrocarbons by peracids: a NiII–oxyl species, an aroyloxy radical, or a NiII–peracid complex?
Source: Royal Society of Chemistry journal article supplement (doi:10.1039/d3dt01276j), 2023-01-01
Supplement: d3dt01276j1.pdf [file d3dt01276j1.pdf]

## Electronic Supplementary Information for

### The Elusive Active Species in Nickel(II)-Mediated Oxidations of Hydrocarbons by Peracids: A Ni<sup>II</sup>-Oxyl, an Aroyloxy Radical, or a Ni<sup>II</sup>-Peracid complex?

*Zhimin Wu,<sup>a,b</sup> Dongru Sun<sup>\*a,b</sup> Yong-Min Lee,<sup>c</sup> Yufen Zhao,<sup>a,b</sup> Wonwoo Nam<sup>\*c</sup> and Yong Wang<sup>\*a,b</sup>*

a. Institute of Drug Discovery Technology, Ningbo University, Ningbo 315211, Zhejiang, China

b. Qian Xuesen Collaborative Research Center of Astrochemistry and Space Life Sciences, Ningbo  
University, Ningbo 315211, Zhejiang, China

c. Department of Chemistry and Nano Science, Ewha Womans University, Seoul 03760, Korea

Email: [yong@nbu.edu.cn](mailto:yong@nbu.edu.cn), [wwnam@ewha.ac.kr](mailto:wwnam@ewha.ac.kr), [sundongru@nbu.edu.cn](mailto:sundongru@nbu.edu.cn)

# Table of Contents

|                                                                                                                                                          |    |
|----------------------------------------------------------------------------------------------------------------------------------------------------------|----|
| Part I. The calculated data on the oxidants <b>1</b> .....                                                                                               | 3  |
| Part II. The conversion of a Ni <sup>II</sup> - <i>m</i> CPBA complex to a Ni <sup>III</sup> -oxyl species and a <i>m</i> CBA <sup>•</sup> radical. .... | 5  |
| Part III. C-H bond activation by <i>m</i> CBA <sup>•</sup> and by the Ni <sup>III</sup> -OH species .....                                                | 9  |
| Part IV. Reactions of R <sup>•</sup> with <i>m</i> CBA and dichloromethane.....                                                                          | 13 |
| Part V. Robust oxidative ability of a Ni <sup>II</sup> - <i>m</i> CPBA complex in hydroxylation .....                                                    | 16 |
| Part VI. C-H bond activation by the Ni <sup>III</sup> -O <sup>•</sup> species .....                                                                      | 16 |
| PART VII. Cartesian coordinates .....                                                                                                                    | 22 |

## Part I. The calculated data on the oxidants 1

**Table S1.** Benchmark of the performance of the employed B3LYP functional with other 5 functionals. Calculations were performed at the B2 level.

|                       | B3LYP-D3BJ   | $\Delta E$  | B3PW91-D3BJ               | $\Delta E$  | PBE0-D3BJ    | $\Delta E$  | M06          | $\Delta E$  | TPSSh        | $\Delta E$  | OPBE         | $\Delta E$  |
|-----------------------|--------------|-------------|---------------------------|-------------|--------------|-------------|--------------|-------------|--------------|-------------|--------------|-------------|
| <sup>1</sup> <b>1</b> | -2548.285836 | <b>28.8</b> | -2547.643945 <sup>a</sup> | <b>31.0</b> | -2546.056068 | <b>34.8</b> | -2546.927026 | <b>24.0</b> | -2548.109735 | <b>27.6</b> | -2547.685073 | <b>13.1</b> |
| <sup>3</sup> <b>1</b> | -2548.331751 | <b>0.0</b>  | -2547.693351              | <b>0.0</b>  | -2546.111597 | <b>0.0</b>  | -2546.965281 | <b>0.0</b>  | -2548.153703 | <b>0.0</b>  | -2547.705977 | <b>0.0</b>  |

a. Absolute energies are in au units and the relative ones are in kcal mol<sup>-1</sup> units

**Table S2.** Various SCF and Gibbs free energies of **1** on the different spin states. Calculations were performed at the UB3LYP-D3(BJ)/B2//B1 level in solvent.

|                       | OPT/B1                    | $\Delta E$  | OPT/B1+ZPE   | $\Delta E$  | SPE          | $\Delta E$  | SPE/B2+ZPE   | $\Delta E$  | $G$          | $\Delta G$  |
|-----------------------|---------------------------|-------------|--------------|-------------|--------------|-------------|--------------|-------------|--------------|-------------|
| <sup>1</sup> <b>1</b> | -2547.859570 <sup>a</sup> | <b>29.1</b> | -2547.287164 | <b>29.5</b> | -2548.285836 | <b>28.8</b> | -2547.713429 | <b>29.3</b> | -2547.368211 | <b>31.1</b> |
| <sup>3</sup> <b>1</b> | -2547.905882              | <b>0.0</b>  | -2547.334194 | <b>0.0</b>  | -2548.331751 | <b>0.0</b>  | -2547.760063 | <b>0.0</b>  | -2547.417782 | <b>0.0</b>  |
| <sup>5</sup> <b>1</b> | -2547.787534              | <b>74.3</b> | -2547.218684 | <b>72.5</b> | -2548.212592 | <b>74.8</b> | -2547.643742 | <b>73.0</b> | -2547.300313 | <b>73.7</b> |

a. Absolute energies are in au units and the relative ones are in kcal mol<sup>-1</sup> units

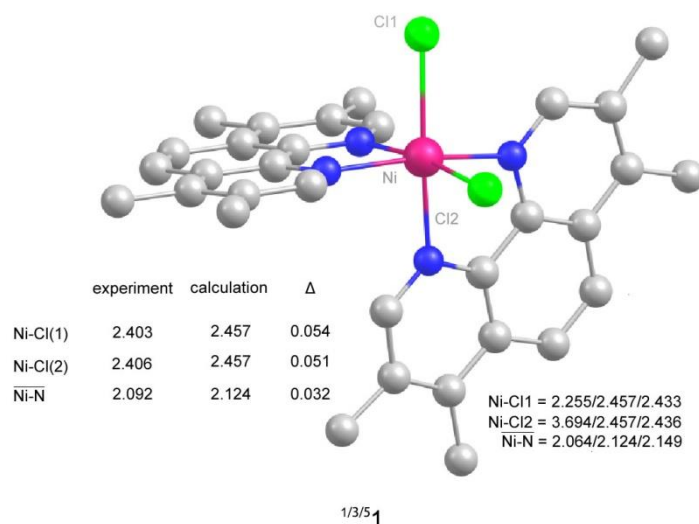

**Fig. S1** Optimized structures of **1** on the different spin states. Calculations were done at the UB3LYP-D3(BJ)/B1 level in solvent. Lengths are in Å units. Hydrogen atoms of the supporting ligand are omitted for clarity.

**Table S3.** Mulliken spin densities and charges of **1** on the different spin states. Calculations were done at the UB3LYP-D3(BJ)/B1 level in solvent.

|                       | charge |        |       |       | Spin density |        |      |      |
|-----------------------|--------|--------|-------|-------|--------------|--------|------|------|
|                       | Ni     | Ligand | Cl1   | Cl2   | Ni           | Ligand | Cl1  | Cl2  |
| <sup>1</sup> <b>1</b> | 0.36   | 0.96   | -0.46 | -0.87 | 0.00         | 0.00   | 0.00 | 0.00 |
| <sup>3</sup> <b>1</b> | 0.33   | 0.85   | -0.59 | -0.59 | 1.59         | 0.26   | 0.08 | 0.08 |
| <sup>5</sup> <b>1</b> | 0.26   | 0.89   | -0.58 | -0.58 | 1.60         | 2.23   | 0.09 | 0.09 |

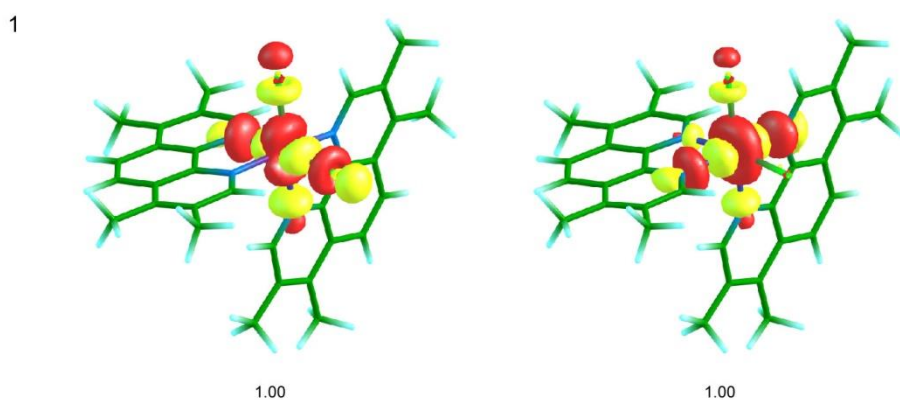

**Fig. S2.** Singly-occupied natural orbitals (SNOs) of **1** on the triplet spin states. Calculations were performed at the UB3LYP-D3(BJ)/B1 level in solvent. Positive values represent alpha-electron occupations.

## Part II. The conversion of a Ni<sup>II</sup>-*m*CPBA complex to a Ni<sup>III</sup>-oxyl species and a *m*CBA<sup>•</sup> radical.

**Table S4.** Various SCF and Gibbs free energies in the conversion of a Ni<sup>II</sup>-*m*CPBA complex **2** to a Ni<sup>III</sup>-oxyl species *via* a complex of a Ni<sup>III</sup>-OH species and a *m*CBA<sup>•</sup> radical on the singlet and triplet spin states. Calculations were performed at the UB3LYP-D3(BJ)/B2//B1 level in solvent.

|                                      | OPT/B1                    | $\Delta E$  | OPT/B1+ZPE   | $\Delta E$  | SPE          | $\Delta E$  | SPE/B2+ZPE   | $\Delta E$  | <i>G</i>     | $\Delta G$  |
|--------------------------------------|---------------------------|-------------|--------------|-------------|--------------|-------------|--------------|-------------|--------------|-------------|
| <sup>1</sup> <b>2</b>                | -3542.406577 <sup>a</sup> | <b>13.0</b> | -3541.693215 | <b>13.2</b> | -3542.997435 | <b>14.0</b> | -3542.284073 | <b>14.3</b> | -3541.794396 | <b>13.1</b> |
| <sup>3</sup> <b>2</b>                | -3542.427219              | <b>0.0</b>  | -3541.714308 | <b>0.0</b>  | -3543.019764 | <b>0.0</b>  | -3542.306853 | <b>0.0</b>  | -3541.815234 | <b>0.0</b>  |
| <sup>5</sup> <b>2</b>                | -3542.327355              | <b>62.7</b> | -3541.619517 | <b>59.5</b> | -3542.920023 | <b>62.6</b> | -3542.212185 | <b>59.4</b> | -3541.720745 | <b>59.3</b> |
| <sup>1</sup> <b>TS</b> <sub>23</sub> | -3542.335991              | <b>57.2</b> | -3541.627030 | <b>54.8</b> | -3542.937761 | <b>51.5</b> | -3542.228800 | <b>49.0</b> | -3541.570057 | <b>53.1</b> |
| <sup>3</sup> <b>TS</b> <sub>23</sub> | -3542.386999              | <b>25.2</b> | -3541.676860 | <b>23.5</b> | -3542.985704 | <b>21.4</b> | -3542.275786 | <b>19.5</b> | -3541.780030 | <b>22.1</b> |
| <sup>1</sup> <b>3</b>                | -3542.411580              | <b>9.8</b>  | -3541.698911 | <b>9.7</b>  | -3543.003592 | <b>10.1</b> | -3542.290923 | <b>10.0</b> | -3541.794731 | <b>12.9</b> |
| <sup>3</sup> <b>3</b>                | -3542.403037              | <b>15.2</b> | -3541.692636 | <b>13.6</b> | -3543.002720 | <b>10.7</b> | -3542.292319 | <b>9.1</b>  | -3541.796193 | <b>11.9</b> |
| <sup>3</sup> <b>TS</b> <sub>34</sub> | -3542.380643              | <b>29.2</b> | -3541.675791 | <b>24.2</b> | -3542.979754 | <b>25.1</b> | -3542.274902 | <b>20.0</b> | -3541.778902 | <b>22.8</b> |
| <sup>1</sup> <b>4</b>                | -3542.373301              | <b>33.8</b> | -3541.661098 | <b>33.4</b> | -3542.975648 | <b>27.7</b> | -3542.263445 | <b>27.2</b> | -3541.762049 | <b>33.4</b> |
| <sup>3</sup> <b>4</b>                | -3542.401741              | <b>16.0</b> | -3541.690004 | <b>15.3</b> | -3543.002202 | <b>11.0</b> | -3542.290465 | <b>10.3</b> | -3541.790523 | <b>15.5</b> |

a. Absolute energies are in au units and the relative ones are in kcal mol<sup>-1</sup> units

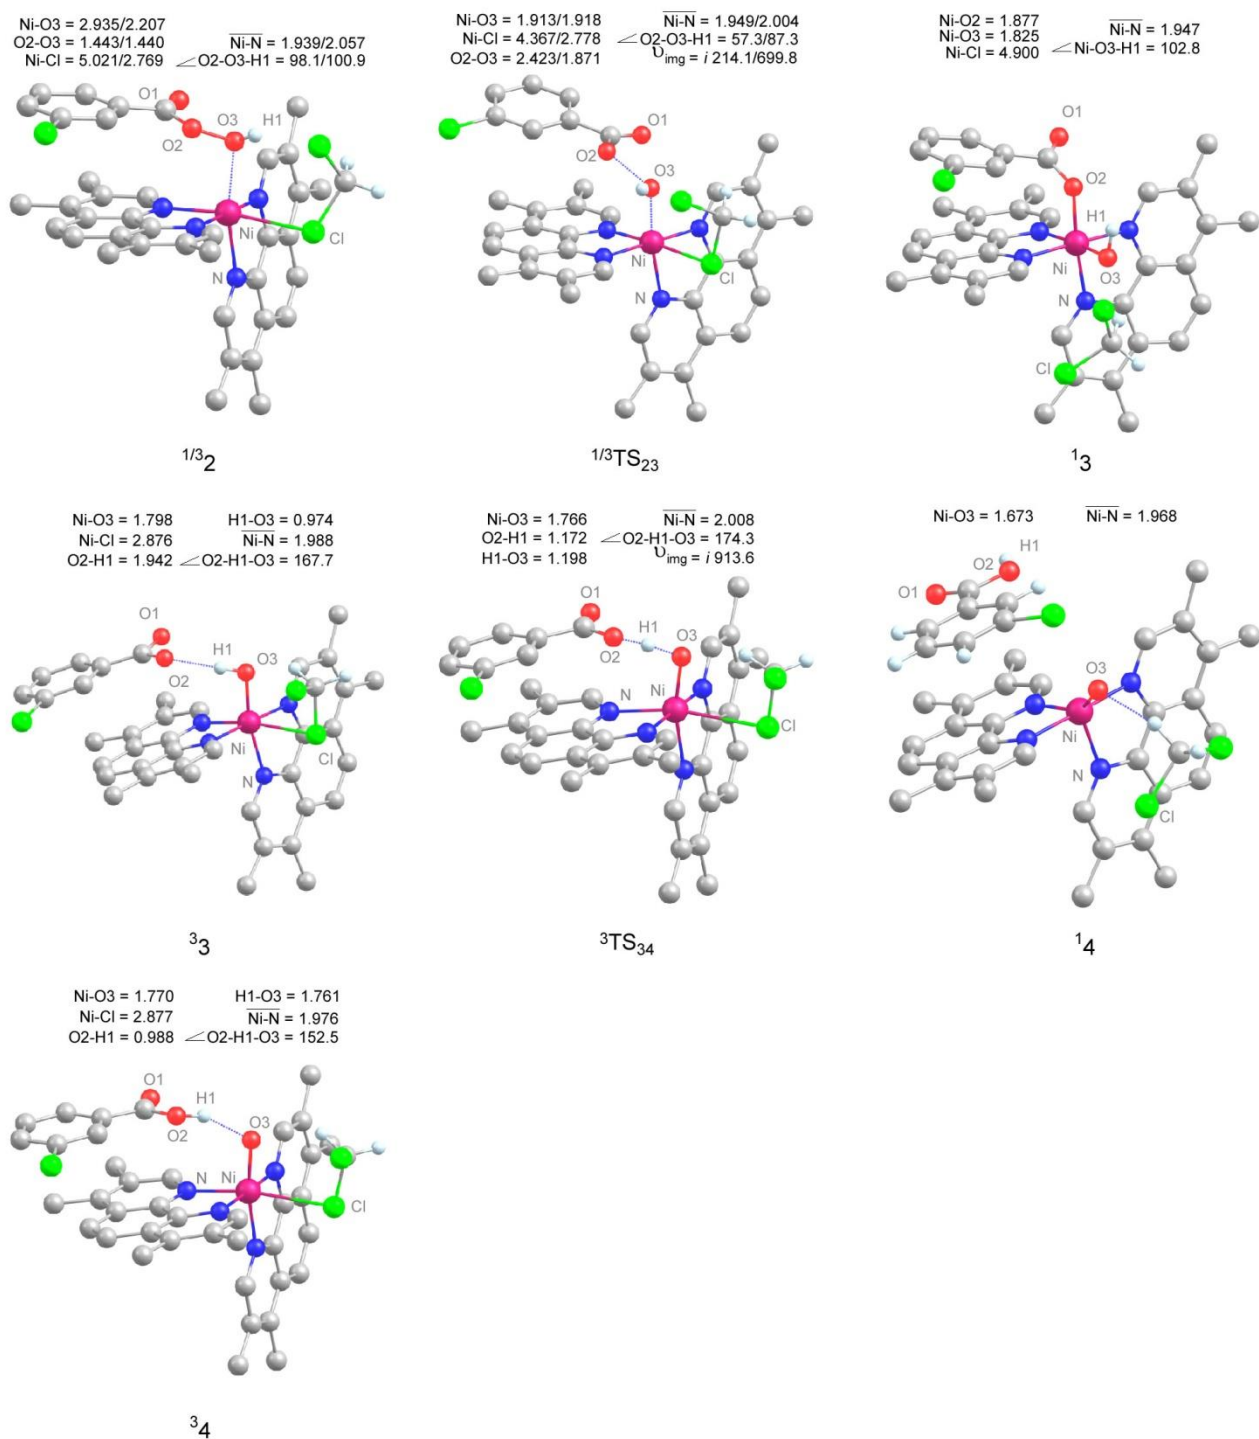

**Fig. S3** The geometric information of the reaction intermediates in the conversion of a Ni<sup>II</sup>-*m*CPBA complex **2** to a Ni<sup>III</sup>-oxyl species *via* a complex of a Ni<sup>III</sup>-OH species and a *m*CBA<sup>•</sup> radical on the singlet and triplet spin states. Calculations were performed at the UB3LYP-D3(BJ)/B1 level in solvent. Lengths are in Å units, bond angles are in ° units and imaginary frequencies are in cm<sup>-1</sup> units. Hydrogen atoms of the supporting ligand are omitted for clarity.

**Table S5.** Mulliken spin densities and charges of the reaction intermediates in the conversion of a Ni<sup>II</sup>-*m*CPBA complex **2** to a Ni<sup>III</sup>-oxyl species *via* a complex of a Ni<sup>III</sup>-OH species and a *m*CBA<sup>•</sup> radical on the singlet and triplet spin states. Calculations were performed at the UB3LYP-D3(BJ)/B1 level in solvent.

|                                      | charge |        |                  |       |      |                                 | Spin density |        |                  |       |      |                                 |
|--------------------------------------|--------|--------|------------------|-------|------|---------------------------------|--------------|--------|------------------|-------|------|---------------------------------|
|                                      | Ni     | Ligand | <i>m</i> CPBA-OH | O3    | H    | CH <sub>2</sub> Cl <sub>2</sub> | Ni           | Ligand | <i>m</i> CPBA-OH | O3    | H    | CH <sub>2</sub> Cl <sub>2</sub> |
| <sup>1</sup> <b>2</b>                | 0.67   | 1.20   | -0.02            | -0.28 | 0.37 | 0.05                            | 0.00         | 0.00   | 0.00             | 0.00  | 0.00 | 0.00                            |
| <sup>3</sup> <b>2</b>                | 0.59   | 1.07   | 0.06             | -0.29 | 0.39 | 0.19                            | 1.61         | 0.34   | 0.00             | 0.03  | 0.00 | 0.02                            |
| <sup>1</sup> <b>TS</b> <sub>23</sub> | 0.78   | 1.64   | -0.30            | -0.47 | 0.34 | 0.00                            | 0.00         | 0.00   | 0.00             | 0.00  | 0.00 | 0.00                            |
| <sup>3</sup> <b>TS</b> <sub>23</sub> | 0.58   | 1.40   | -0.12            | -0.41 | 0.36 | 0.18                            | 1.21         | 0.20   | 0.49             | 0.07  | 0.00 | 0.03                            |
| <sup>1</sup> <b>3</b>                | 0.60   | 1.86   | -0.30            | -0.53 | 0.35 | 0.01                            | 0.00         | 0.00   | 0.00             | 0.00  | 0.00 | 0.00                            |
| <sup>3</sup> <b>3</b>                | 0.59   | 1.46   | 0.08             | -0.60 | 0.02 | 0.44                            | 0.84         | 0.18   | 1.00             | -0.05 | 0.03 | 0.00                            |
| <sup>3</sup> <b>TS</b> <sub>34</sub> | 0.57   | 1.74   | -0.19            | -0.66 | 0.01 | 0.54                            | 0.93         | 0.66   | 0.46             | -0.07 | 0.02 | 0.00                            |
| <sup>1</sup> <b>4</b>                | 0.77   | 1.51   | -0.16            | -0.49 | 0.36 | 0.01                            | 0.00         | 0.00   | 0.00             | 0.00  | 0.00 | 0.00                            |
| <sup>3</sup> <b>4</b>                | 0.64   | 1.60   | -0.36            | -0.38 | 0.03 | 0.47                            | 0.73         | 0.24   | 0.00             | 1.00  | 0.03 | -0.01                           |

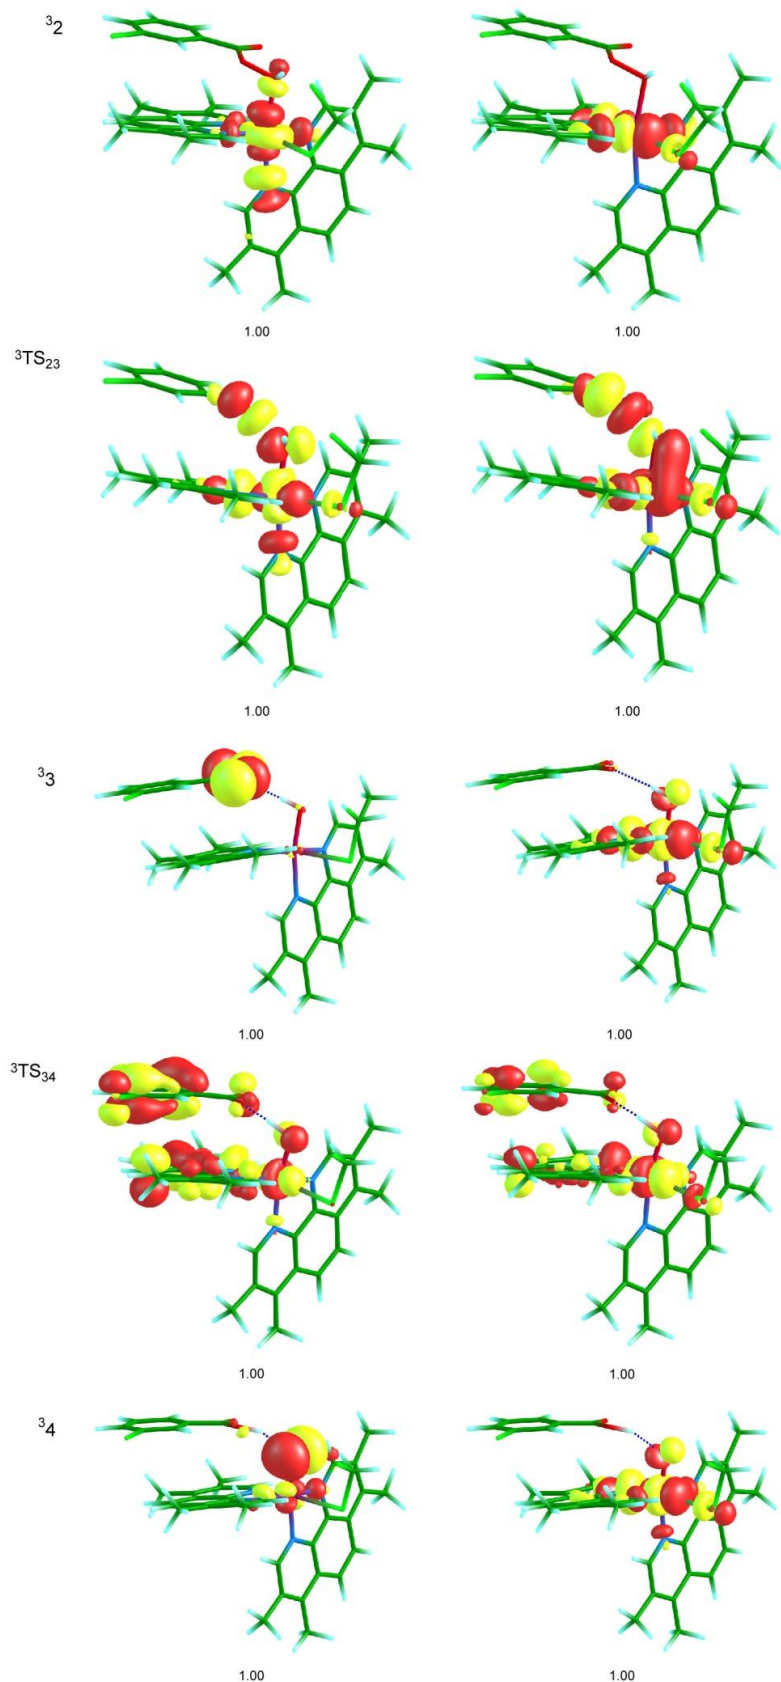

**Fig. S4** Singly-occupied natural orbitals (SNOs) of the reaction intermediates in the conversion of a  $\text{Ni}^{\text{II}}\text{-}m\text{CPBA}$  complex **2** to a  $\text{Ni}^{\text{III}}\text{-oxyl}$  species *via* a complex of a  $\text{Ni}^{\text{III}}\text{-OH}$  species and a *mCBA* radical on the singlet and triplet spin states. Calculations were performed at the B1 level in solvent. Positive values represent alpha-electron occupations.



## Part III. C-H bond activation by $mCBA^\bullet$ and by the $Ni^{III}$ -OH species

**Table S6.** Various SCF and Gibbs free energies of the reaction intermediates for the hydrogen atom abstraction of cyclohexane by a  $mCBA^\bullet$  radical on the doublet spin states. Calculations were performed at the UB3LYP-D3(BJ)/B2//B1 level in solvent.

|                | OPT/B1                    | $\Delta E$  | OPT/B1+ZPE   | $\Delta E$  | SPE/B2       | $\Delta E$  | SPE/B2+ZPE   | $\Delta E$  | $G$          | $\Delta G$  |
|----------------|---------------------------|-------------|--------------|-------------|--------------|-------------|--------------|-------------|--------------|-------------|
| $^23'+CH$      | -1115.717942 <sup>a</sup> | <b>0.0</b>  | -1115.454189 | <b>0.0</b>  | -1115.903701 | <b>0.0</b>  | -1115.639949 | <b>0.0</b>  | -1115.508276 | <b>0.0</b>  |
| $^2TS_{3'}+CH$ | -1115.708400              | <b>6.0</b>  | -1115.448986 | <b>3.3</b>  | -1115.896119 | <b>4.8</b>  | -1115.636705 | <b>2.0</b>  | -1115.497997 | <b>6.5</b>  |
| $^2IM_{3'}+CH$ | -1115.725600              | <b>-4.8</b> | -1115.462253 | <b>-5.1</b> | -1115.914730 | <b>-6.9</b> | -1115.651383 | <b>-7.2</b> | -1115.512825 | <b>-2.9</b> |

a. Absolute energies are in au units and the relative ones are in kcal mol<sup>-1</sup> units

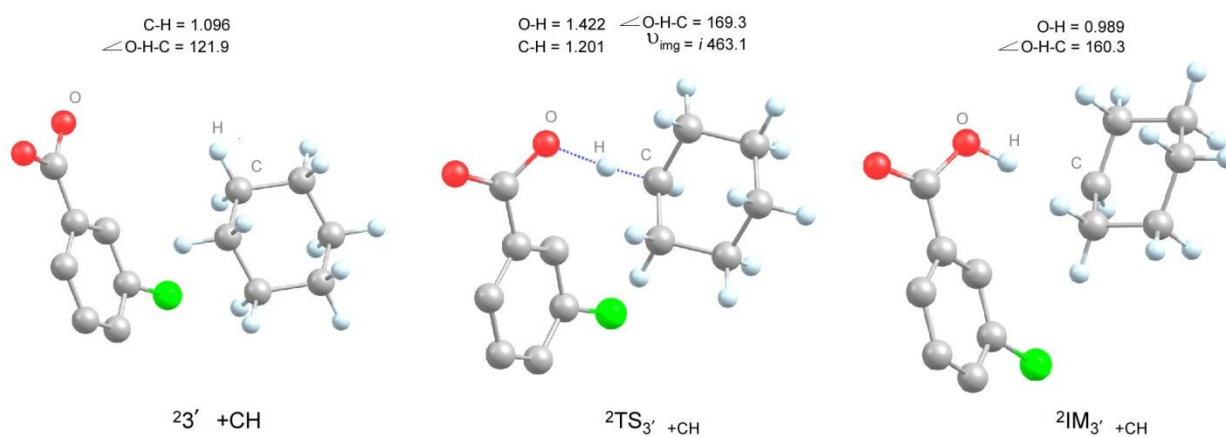

**Fig. S5** The geometric information of the reaction intermediates for the hydrogen atom abstraction of cyclohexane by a  $mCBA^\bullet$  on the doublet spin states. Calculations were performed at the UB3LYP-D3(BJ)/B1 level in solvent. Lengths are in Å units, bond angles are in ° units and imaginary frequency is in cm<sup>-1</sup> units. Hydrogen atoms of the  $mCPBA$  are omitted for clarity.

**Table S7.** Mulliken spin densities and charges of the reaction intermediates for the hydrogen atom abstraction of cyclohexane by a *mCBA*<sup>•</sup> on the doublet spin states. Calculations were performed at the UB3LYP-D3(BJ)/B1 level in solvent.

|                                  | Charge   |       |      | Spin density |       |      |
|----------------------------------|----------|-------|------|--------------|-------|------|
|                                  | mCPBA-OH | Sub-H | H    | mCPBA-OH     | Sub-H | H    |
| <sup>2</sup> 3'+CH               | 0.02     | -0.10 | 0.09 | 1.00         | 0.00  | 0.00 |
| <sup>2</sup> TS <sub>3'+CH</sub> | -0.34    | 0.07  | 0.24 | 0.58         | 0.42  | 0.00 |
| <sup>2</sup> IM <sub>3'+CH</sub> | -0.39    | 0.06  | 0.34 | 0.04         | 0.92  | 0.04 |

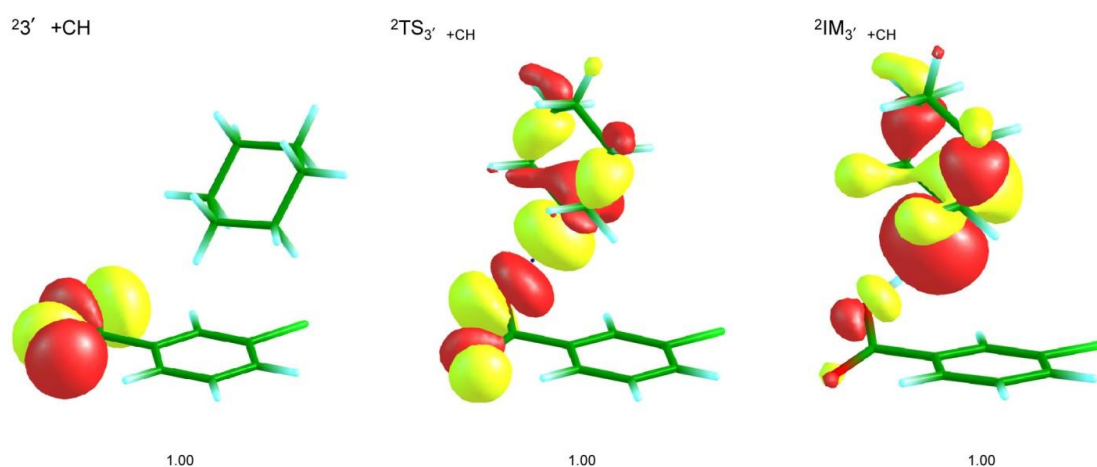

**Fig. S6** Singly-occupied natural orbitals (SNOs) of the reaction intermediates for the hydrogen atom abstraction of cyclohexane by a *mCBA*<sup>•</sup> on the doublet spin states. Calculations were performed at the UB3LYP-D3(BJ)/B1 level in solvent. Positive values represent alpha-electron occupations.

**Table S8.** Various SCF and Gibbs free energies of the reaction intermediates for the hydrogen atom abstraction of cyclohexane by a Ni<sup>III</sup>-OH species on the doublet spin states. Calculations were performed at the UB3LYP-D3(BJ)/B2//B1 level in solvent.

|                                    | OPT/B1       | $\Delta E$  | OPT/B1+ZPE   | $\Delta E$  | SPE/B2       | $\Delta E$  | SPE/B2+ZPE   | $\Delta E$  | $G$          | $\Delta G$   |
|------------------------------------|--------------|-------------|--------------|-------------|--------------|-------------|--------------|-------------|--------------|--------------|
| <sup>2</sup> 3''+CH                | -2898.534439 | <b>0.0</b>  | -2897.746137 | <b>0.0</b>  | -2899.039090 | <b>0.0</b>  | -2898.250788 | <b>0.0</b>  | -2897.842742 | <b>0.0</b>   |
| <sup>2</sup> TS <sub>3</sub> ''+CH | -2898.518863 | <b>9.8</b>  | -2897.736216 | <b>6.2</b>  | -2899.020969 | <b>11.4</b> | -2898.238322 | <b>7.8</b>  | -2897.834281 | <b>5.3</b>   |
| <sup>2</sup> IM <sub>3</sub> ''+CH | -2898.545108 | <b>-6.7</b> | -2897.760107 | <b>-8.8</b> | -2899.046853 | <b>-4.9</b> | -2898.261852 | <b>-6.9</b> | -2897.860183 | <b>-10.9</b> |

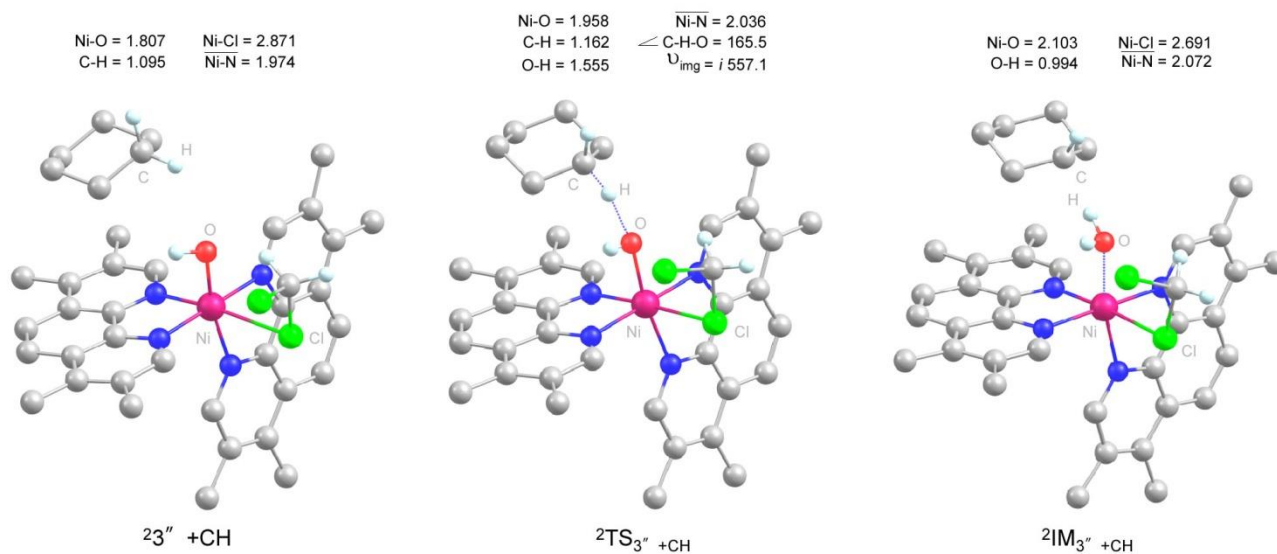

**Fig. S7** The geometric information of the reaction intermediates in the hydrogen atom abstraction of cyclohexane by a Ni<sup>III</sup>-OH species on the doublet spin states. Calculations were performed at the UB3LYP-D3(BJ)/B1 level in solvent. Lengths are in Å units, bond angles are in ° units and imaginary frequency is in cm<sup>-1</sup> units. Hydrogen atoms of the supporting ligand and cyclohexane are omitted for clarity.

**Table S9.** Mulliken spin densities and charges of the reaction intermediates in the hydrogen atom abstraction of cyclohexane by a Ni<sup>III</sup>-OH species on the doublet spin states. Calculations were performed at the UB3LYP-D3(BJ)/B1 level in solvent.

|                                    | charge |        |       |      |       |                                 | Spin density |        |       |       |       |                                 |
|------------------------------------|--------|--------|-------|------|-------|---------------------------------|--------------|--------|-------|-------|-------|---------------------------------|
|                                    | Ni     | Ligand | OH    | H    | Sub-H | CH <sub>2</sub> Cl <sub>2</sub> | Ni           | Ligand | OH    | H     | Sub-H | CH <sub>2</sub> Cl <sub>2</sub> |
| <sup>2</sup> 3''+CH                | 0.62   | 1.52   | -0.25 | 0.10 | -0.11 | 0.12                            | 0.84         | 0.18   | -0.04 | 0.00  | 0.00  | 0.03                            |
| <sup>2</sup> TS <sub>3</sub> ''+CH | 0.58   | 1.20   | -0.18 | 0.20 | 0.04  | 0.15                            | 1.43         | 0.24   | -0.39 | 0.00  | -0.31 | 0.02                            |
| <sup>2</sup> IM <sub>3</sub> ''+CH | 0.55   | 1.06   | -0.22 | 0.36 | 0.08  | 0.17                            | 1.61         | 0.32   | 0.00  | -0.05 | -0.91 | 0.03                            |

$33'' + \text{CH}$

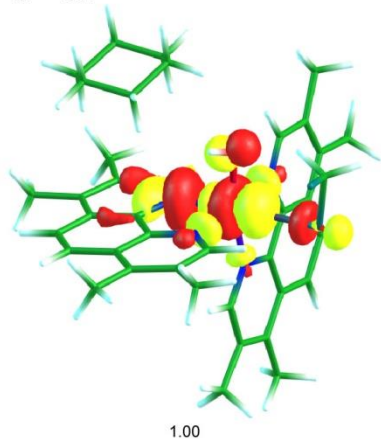

1.00

$\text{TS}_{33''} + \text{CH}$

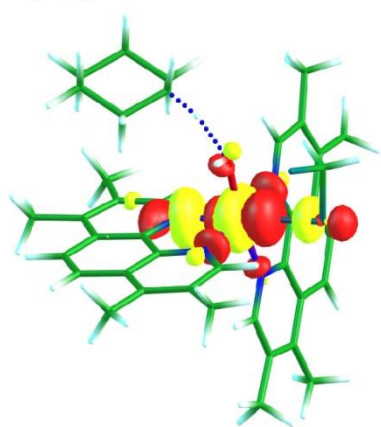

1.00

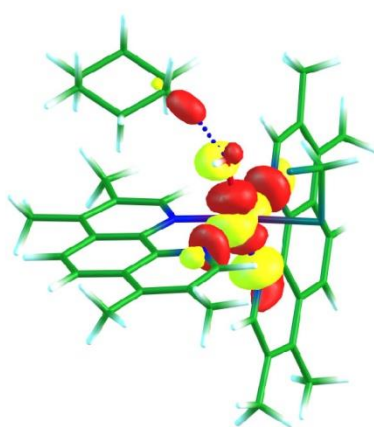

0.83

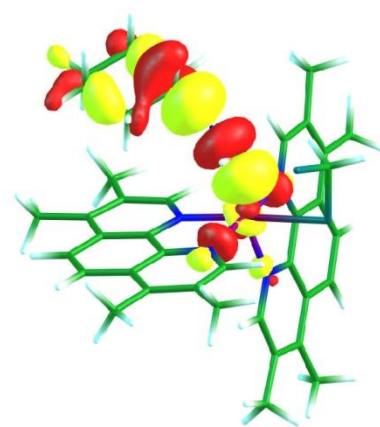

-0.83

$\text{IM}_{33''} + \text{CH}$

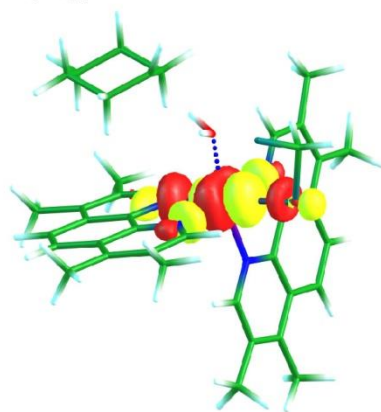

1.00

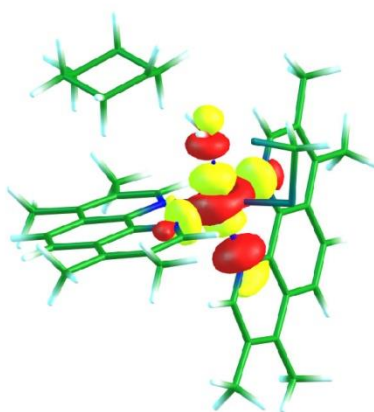

1.00

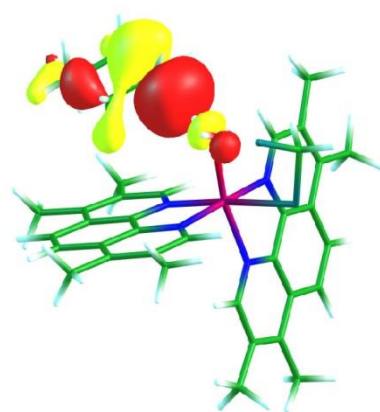

-1.00

**Fig. S8** Singly-occupied natural orbitals (SNOs) of the reaction intermediates in the hydrogen atom abstraction of cyclohexane by a  $\text{Ni}^{\text{III}}\text{-OH}$  species on the doublet spin states. Calculations were performed at the UB3LYP-D3(BJ)/B1 level in solvent. Positive values represent alpha-electron occupations.

## Part IV. Reactions of R<sup>•</sup> with *m*CPBA and dichloromethane

**Table S10.** Various SCF and Gibbs free energies of the reaction intermediates in reactions of carbon-centered R<sup>•</sup> species with *m*CPBA on the doublet spin states. Calculations were performed at the UB3LYP-D3(BJ)/B2//B1 level in solvent.

|                               | OPT/B1       | $\Delta E$   | OPT/B1+ZPE   | $\Delta E$   | SPE/B2       | $\Delta E$   | SPE/B2+ZPE   | $\Delta E$   | $G$          | $\Delta G$   |
|-------------------------------|--------------|--------------|--------------|--------------|--------------|--------------|--------------|--------------|--------------|--------------|
| <sup>2</sup> IM'              | -1190.854607 | <b>0.0</b>   | -1190.588376 | <b>0.0</b>   | -1191.064282 | <b>0.0</b>   | -1190.798051 | <b>0.0</b>   | -1190.641442 | <b>0.0</b>   |
| <sup>2</sup> TS <sub>OH</sub> | -1190.838858 | <b>9.9</b>   | -1190.574995 | <b>8.4</b>   | -1191.046627 | <b>11.1</b>  | -1190.782764 | <b>9.6</b>   | -1190.625609 | <b>9.9</b>   |
| <sup>2</sup> PC <sub>OH</sub> | -1190.945309 | <b>-56.9</b> | -1190.675829 | <b>-54.9</b> | -1191.153879 | <b>-56.2</b> | -1190.884399 | <b>-54.2</b> | -1190.729622 | <b>-55.3</b> |

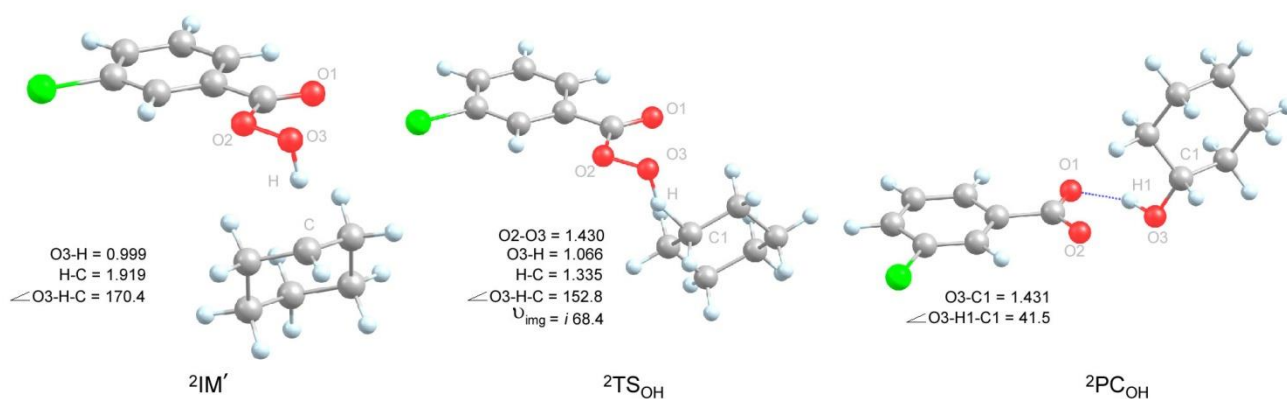

**Fig. S9** The geometric information of the reaction intermediates in reactions of carbon-centered R<sup>•</sup> species with *m*CPBA on the doublet spin states. Calculations were done at the UB3LYP-D3(BJ)/B1 level in solvent. Lengths are in Å units, bond angles are in ° units and imaginary frequency is in cm<sup>-1</sup> units.

**Table S11.** Mulliken spin densities and charges of the reaction intermediates in reactions of carbon-centered R<sup>•</sup> species with *m*CPBA on the doublet spin states. Calculations were performed at the UB3LYP-D3(BJ)/B1 level in solvent.

|                               | charge   |       |      |       | Spin density |      |      |       |
|-------------------------------|----------|-------|------|-------|--------------|------|------|-------|
|                               | mCPBA-OH | O     | H    | Sub-H | mCPBA-OH     | O    | H    | Sub-H |
| <sup>2</sup> IM'              | -0.08    | -0.33 | 0.36 | 0.05  | 0.00         | 0.05 | 0.04 | 0.91  |
| <sup>2</sup> TS <sub>OH</sub> | -0.08    | -0.31 | 0.36 | 0.04  | 0.02         | 0.24 | 0.01 | 0.72  |
| <sup>2</sup> PC <sub>OH</sub> | -0.30    | -0.44 | 0.37 | 0.38  | 0.58         | 0.38 | 0.00 | 0.05  |

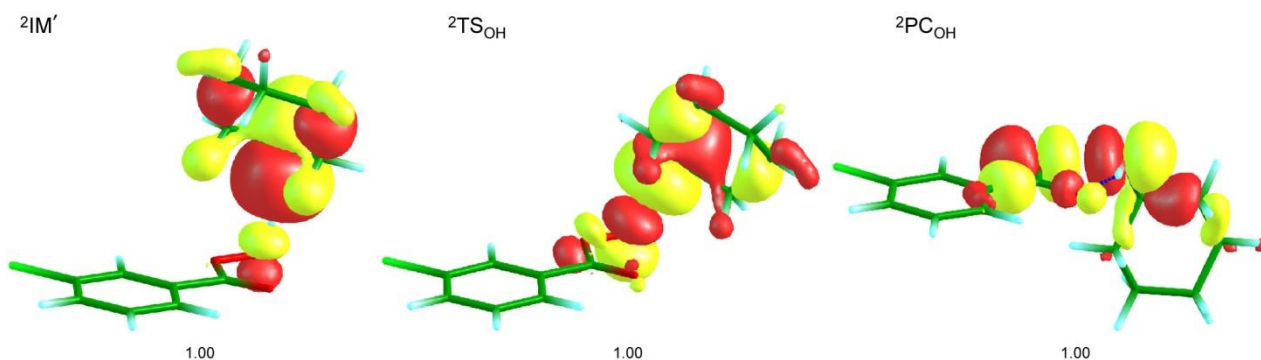

**Fig. S10** Singly-occupied natural orbitals (SNOs) of the reaction intermediates in reactions of carbon-centered  $R^\bullet$  radical with *m*CPBA on the doublet spin states. Calculations were performed at the UB3LYP-D3(BJ)/B1 level in solvent. Positive values represent alpha-electron occupations.

**Table S12.** Various SCF and Gibbs free energies of the reaction intermediates in reactions of carbon-centered  $R^\bullet$  radical with dichloromethane on the doublet spin states. Calculations were performed at the UB3LYP-D3(BJ)/B2//B1 level in solvent.

|             | OPT/B1       | $\Delta E$  | OPT/B1+ZPE   | $\Delta E$  | SPE/B2       | $\Delta E$  | SPE/B2+ZPE   | $\Delta E$  | $G$          | $\Delta G$  |
|-------------|--------------|-------------|--------------|-------------|--------------|-------------|--------------|-------------|--------------|-------------|
| $^2IM''$    | -1194.967400 | <b>0.0</b>  | -1194.781541 | <b>0.0</b>  | -1195.085048 | <b>0.0</b>  | -1194.899189 | <b>0.0</b>  | -1194.830850 | <b>0.0</b>  |
| $^2TS_{Cl}$ | -1194.951977 | <b>9.7</b>  | -1194.765715 | <b>9.9</b>  | -1195.068520 | <b>10.4</b> | -1194.882258 | <b>10.6</b> | -1194.807449 | <b>14.7</b> |
| $^2PC_{Cl}$ | -1194.977337 | <b>-6.2</b> | -1194.792351 | <b>-6.8</b> | -1195.095126 | <b>-6.3</b> | -1194.910139 | <b>-6.9</b> | -1194.840732 | <b>-6.2</b> |

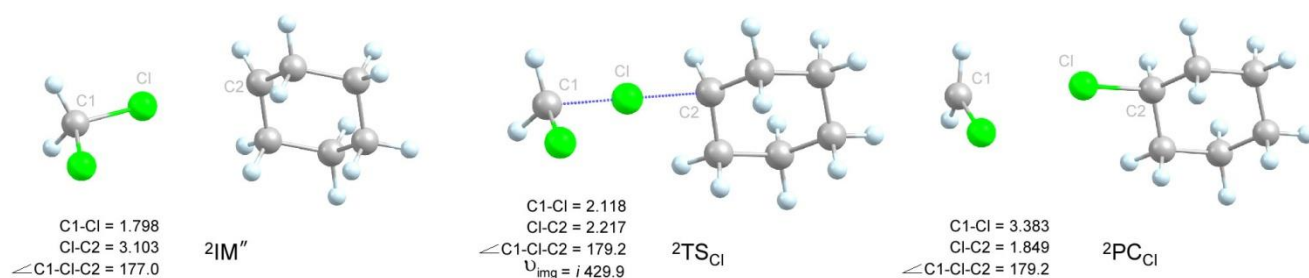

**Fig. S11** The geometric information of the reaction intermediates in reactions of carbon-centered  $R^\bullet$  radical with dichloromethane on the doublet spin states. Calculations were performed at the UB3LYP-D3(BJ)/B1 level in solvent. Lengths are in Å units, bond angles are in  $^\circ$  units and imaginary frequency is in  $cm^{-1}$  units.

**Table S13.** Mulliken spin densities and charges of the reaction intermediates in reactions of carbon-centered R<sup>•</sup> radical with dichloromethane on the doublet spin states. Calculations were performed at the UB3LYP-D3(BJ)/B1 level in solvent.

|                               | charge |                    |       | Spin density |                    |       |
|-------------------------------|--------|--------------------|-------|--------------|--------------------|-------|
|                               | Sub-H  | CH <sub>2</sub> Cl | Cl    | Sub-H        | CH <sub>2</sub> Cl | Cl    |
| <sup>2</sup> IM''             | 0.03   | 0.02               | -0.04 | 0.97         | 0.02               | 0.01  |
| <sup>2</sup> TS <sub>Cl</sub> | 0.18   | 0.00               | -0.18 | 0.57         | 0.53               | -0.10 |
| <sup>2</sup> PC <sub>Cl</sub> | 0.14   | 0.01               | -0.15 | 0.01         | 0.99               | 0.00  |

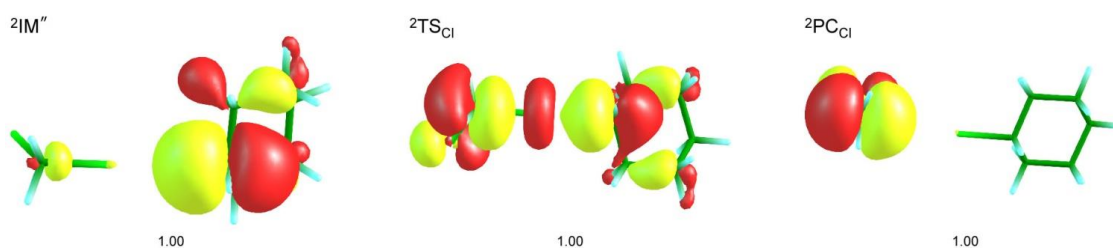

**Fig. S12** Singly-occupied natural orbitals (SNOs) of the reaction intermediates in reactions of carbon-centered R<sup>•</sup> radical with dichloromethane on the doublet spin states. Calculations were performed at the UB3LYP-D3(BJ)/B1 level in solvent. Positive values represent alpha-electron occupations.



## Part V. Robust oxidative ability of a Ni<sup>II</sup>-*m*CPBA complex in hydroxylation

**Table S14.** Various SCF and Gibbs free energies of reaction intermediates of hydroxylation of cyclohexane by a Ni<sup>II</sup>-*m*CPBA complex, on the singlet and triplet spin states. Calculations were performed at the UB3LYP-D3(BJ)/B2//B1 level in solvent.

|                                 | OPT/B1                    | $\Delta E$   | OPT/B1+ZPE   | $\Delta E$   | SPE/B2       | $\Delta E$   | SPE/B2+ZPE   | $\Delta E$   | $G$          | $\Delta G$   |
|---------------------------------|---------------------------|--------------|--------------|--------------|--------------|--------------|--------------|--------------|--------------|--------------|
| <sup>1</sup> 2+CH               | -3778.344156 <sup>a</sup> | <b>8.9</b>   | -3777.458579 | <b>9.2</b>   | -3778.984643 | <b>10.7</b>  | -3778.099066 | <b>11.0</b>  | -3777.570948 | <b>9.3</b>   |
| <sup>3</sup> 2+CH               | -3778.358304              | <b>0.0</b>   | -3777.473263 | <b>0.0</b>   | -3779.001646 | <b>0.0</b>   | -3778.116605 | <b>0.0</b>   | -3777.585817 | <b>0.0</b>   |
| <sup>1</sup> TS <sub>2+CH</sub> | -3778.304227              | <b>33.9</b>  | -3777.425577 | <b>29.9</b>  | -3778.950650 | <b>32.0</b>  | -3778.072000 | <b>28.0</b>  | -3777.536868 | <b>30.7</b>  |
| <sup>3</sup> TS <sub>2+CH</sub> | -3778.326773              | <b>19.8</b>  | -3777.447284 | <b>16.3</b>  | -3778.974803 | <b>16.8</b>  | -3778.095316 | <b>13.4</b>  | -3777.560438 | <b>15.9</b>  |
| <sup>1</sup> PC <sub>2+CH</sub> | -3778.458327              | <b>-62.8</b> | -3777.570522 | <b>-61.0</b> | -3779.103717 | <b>-64.1</b> | -3778.215912 | <b>-62.3</b> | -3777.681804 | <b>-60.2</b> |
| <sup>3</sup> PC <sub>2+CH</sub> | -3778.479073              | <b>-75.8</b> | -3777.591984 | <b>-74.5</b> | -3779.126182 | <b>-78.1</b> | -3778.239093 | <b>-76.9</b> | -3777.703794 | <b>-74.0</b> |

a. Absolute energies are in au units and the relative ones are in kcal mol<sup>-1</sup> units

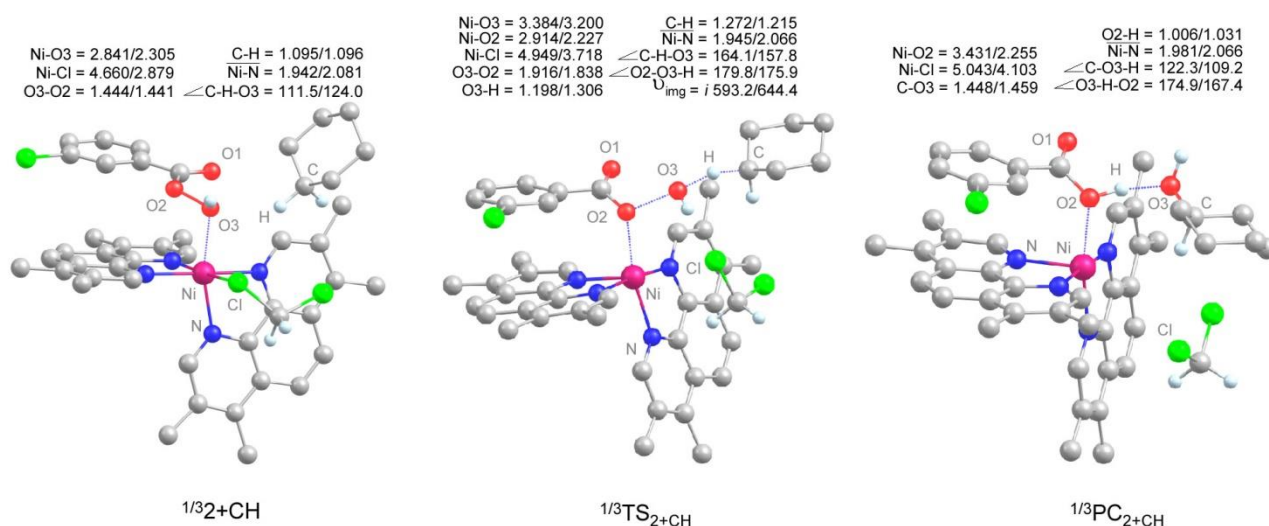

**Fig. S13** The geometric information of reaction intermediates of hydroxylation of cyclohexane by a Ni<sup>II</sup>-*m*CPBA complex on the singlet and triplet spin states. Calculations were performed at the UB3LYP-D3(BJ)/B1 level in solvent. Lengths are in Å units, bond angles are in ° units and imaginary frequency is in cm<sup>-1</sup> units. Hydrogen atoms of the supporting ligand and cyclohexane are omitted for clarity.



**Table S15.** Mulliken spin densities and charges of reaction intermediates of hydroxylation of cyclohexane by a Ni<sup>II</sup>-*m*CPBA complex on the singlet and triplet spin states. Calculations were performed at the UB3LYP-D3(BJ)/B1 level in solvent.

|                                       | charge |        |          |       |                                 |      |       | Spin density |        |          |      |                                 |      |       |
|---------------------------------------|--------|--------|----------|-------|---------------------------------|------|-------|--------------|--------|----------|------|---------------------------------|------|-------|
|                                       | Ni     | Ligand | mCPBA-OH | OH    | CH <sub>2</sub> Cl <sub>2</sub> | H    | Sub-H | Ni           | Ligand | mCPBA-OH | OH   | CH <sub>2</sub> Cl <sub>2</sub> | H    | Sub-H |
| <sup>1</sup> <b>2+CH</b>              | 0.66   | 1.22   | -0.01    | 0.10  | 0.05                            | 0.07 | -0.08 | 0.00         | 0.00   | 0.00     | 0.00 | 0.00                            | 0.00 | 0.00  |
| <sup>3</sup> <b>2+CH</b>              | 0.63   | 1.07   | 0.06     | 0.12  | 0.12                            | 0.07 | -0.08 | 1.63         | 0.33   | 0.00     | 0.02 | 0.02                            | 0.00 | 0.00  |
| <sup>1</sup> <b>TS<sub>2+CH</sub></b> | 0.67   | 1.23   | -0.02    | 0.10  | 0.05                            | 0.09 | -0.11 | 0.00         | 0.00   | 0.00     | 0.00 | 0.00                            | 0.00 | 0.00  |
| <sup>3</sup> <b>TS<sub>2+CH</sub></b> | 0.73   | 1.01   | -0.20    | 0.00  | 0.06                            | 0.27 | 0.15  | 1.64         | 0.32   | 0.05     | 0.00 | 0.00                            | 0.00 | -0.01 |
| <sup>1</sup> <b>PC<sub>2+CH</sub></b> | 0.68   | 1.23   | -0.39    | -0.20 | 0.02                            | 0.33 | 0.33  | 0.00         | 0.00   | 0.00     | 0.00 | 0.00                            | 0.00 | 0.00  |
| <sup>3</sup> <b>PC<sub>2+CH</sub></b> | 0.76   | 1.00   | -0.33    | -0.17 | 0.02                            | 0.36 | 0.37  | 1.64         | 0.33   | 0.03     | 0.00 | 0.00                            | 0.00 | 0.00  |

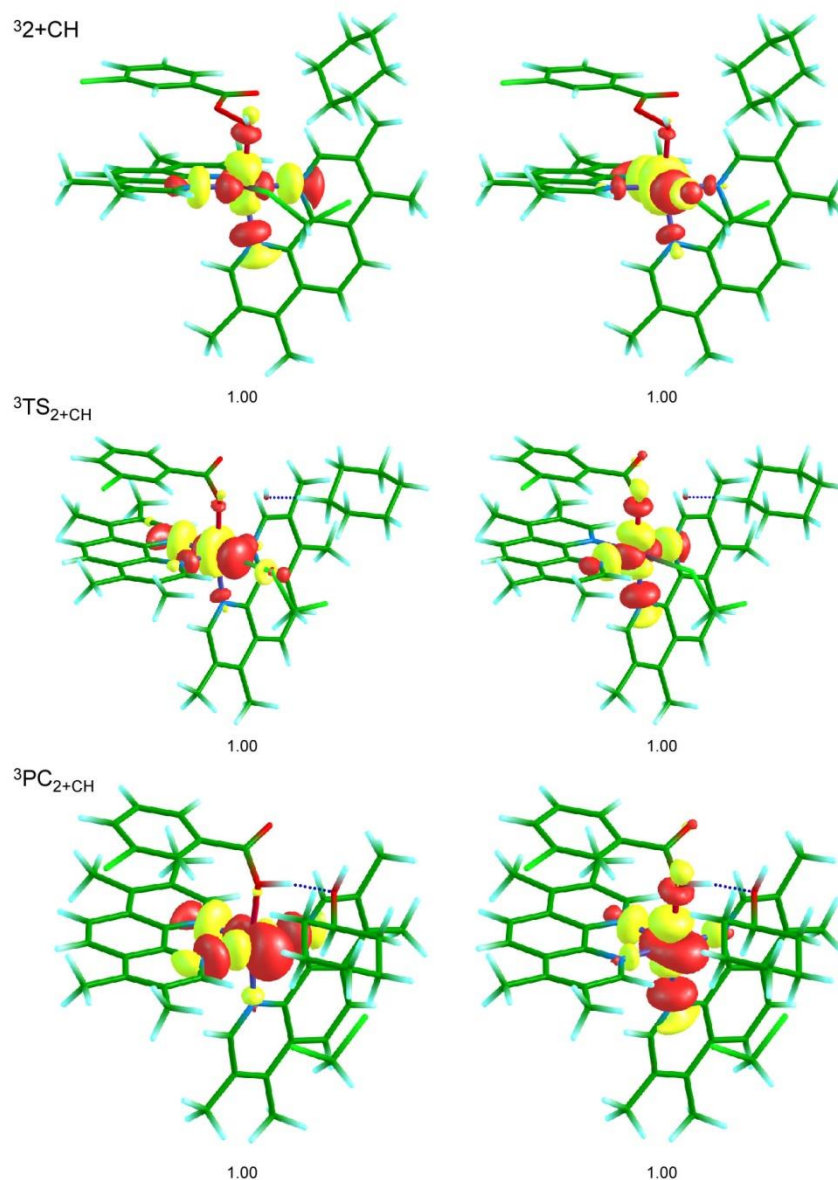

**Fig. S14** Singly-occupied natural orbitals (SNOs) of reaction intermediates of hydroxylation of cyclohexane by a  $\text{Ni}^{\text{II}}\text{-mCPBA}$  complex on the singlet and triplet spin states. Calculations were performed at the UB3LYP-D3(BJ)/B1 level in solvent. Positive values represent alpha-electron occupations.

## Part VI. C-H bond activation by the Ni<sup>III</sup>-O<sup>•</sup> species

**Table S16.** Various SCF and Gibbs free energies of the reaction intermediates in hydroxylation of CHA by a Ni<sup>III</sup>-O<sup>•</sup> species on the triplet spin states. Calculations were performed at the UB3LYP-D3(BJ)/B2//B1 level in solvent.

|                                 | OPT/B1                    | $\Delta E$   | OPT/B1+ZPE   | $\Delta E$   | SPE/B2       | $\Delta E$   | SPE/B2+ZPE   | $\Delta E$   | $G$          | $\Delta G$   |
|---------------------------------|---------------------------|--------------|--------------|--------------|--------------|--------------|--------------|--------------|--------------|--------------|
| <sup>3</sup> 4+CH               | -2897.850075 <sup>a</sup> | <b>0.0</b>   | -2897.073966 | <b>0.0</b>   | -2898.352245 | <b>0.0</b>   | -2897.576136 | <b>0.0</b>   | -2897.174894 | <b>0.0</b>   |
| <sup>3</sup> TS <sub>4+CH</sub> | -2897.853310              | <b>-2.0</b>  | -2897.083565 | <b>-6.0</b>  | -2898.355513 | <b>-2.1</b>  | -2897.585768 | <b>-6.0</b>  | -2897.180406 | <b>-3.5</b>  |
| <sup>3</sup> PC <sub>4+CH</sub> | -2897.993519              | <b>-90.0</b> | -2897.214681 | <b>-88.3</b> | -2898.491934 | <b>-87.7</b> | -2897.713097 | <b>-85.9</b> | -2897.313210 | <b>-86.8</b> |

a. Absolute energies are in au units and the relative ones are in kcal mol<sup>-1</sup> units

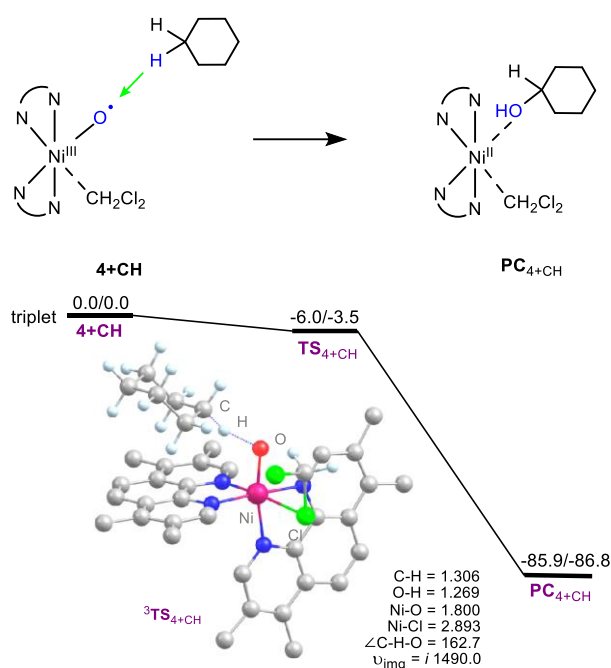

**Fig. S15** Energy profiles (in kcal mol<sup>-1</sup>) for hydroxylation of CHA by a Ni<sup>III</sup>-O<sup>•</sup> species on the triplet spin states. Calculations were performed at the UB3LYP-D3(BJ)/B2//B1 level in solvent. The geometric information of the transition states is presented. Hydrogen atoms of the supporting ligand are omitted for clarity. Lengths are in Å units, angles is in ° unit, and the imaginary frequency is in cm<sup>-1</sup> units.

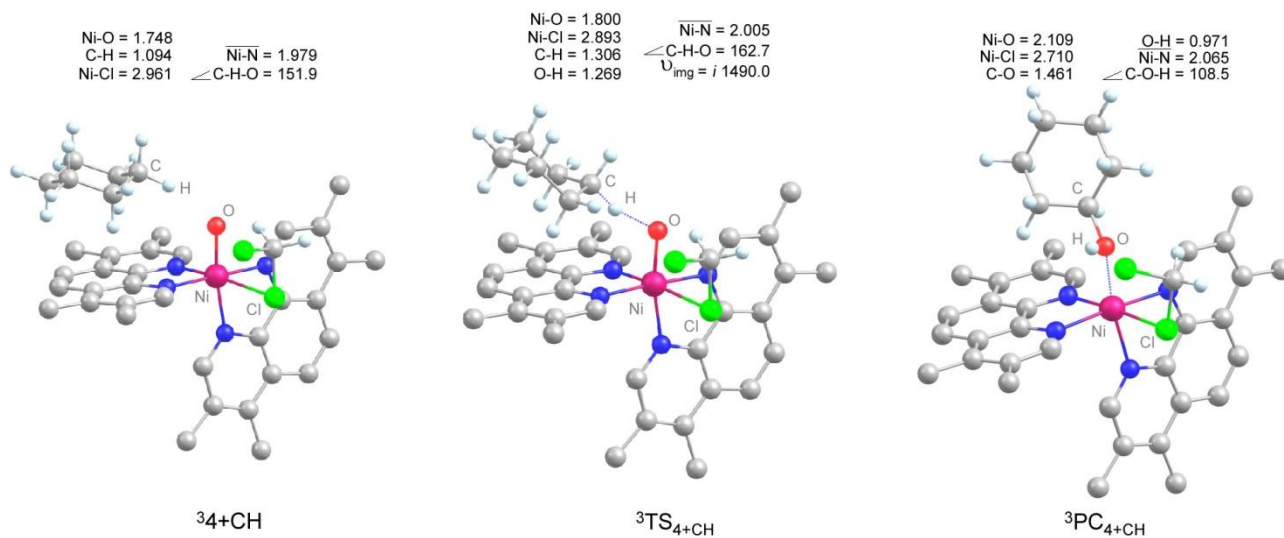

**Fig. S16** The geometric information of the reaction intermediates of hydroxylation of CHA by a  $\text{Ni}^{\text{III}}\text{-O}^\bullet$  species on the triplet spin states. Calculations were performed at the UB3LYP-D3(BJ)/B1 level in solvent. Lengths are in Å units, bond angles are in ° units and imaginary frequency is in  $\text{cm}^{-1}$  units. Hydrogen atoms of the supporting ligand are omitted for clarity.

**Table S17.** Mulliken spin densities and charges of the reaction intermediates for hydroxylation of CHA by a  $\text{Ni}^{\text{III}}\text{-O}^\bullet$  species on the triplet spin states. Calculations were performed at the UB3LYP-D3(BJ)/B1 level in solvent.

|                        | charge |        |       |                          |      |       | Spin density |        |      |                          |       |       |
|------------------------|--------|--------|-------|--------------------------|------|-------|--------------|--------|------|--------------------------|-------|-------|
|                        | Ni     | Ligand | O     | $\text{CH}_2\text{Cl}_2$ | H    | Sub-H | Ni           | Ligand | O    | $\text{CH}_2\text{Cl}_2$ | H     | Sub-H |
| $^3\mathbf{4+CH}$      | 0.67   | 1.57   | -0.34 | 0.12                     | 0.10 | -0.11 | 0.72         | 0.24   | 1.02 | 0.02                     | 0.00  | 0.00  |
| $^3\mathbf{TS}_{4+CH}$ | 0.66   | 1.50   | -0.44 | 0.11                     | 0.18 | -0.01 | 0.76         | 0.21   | 0.79 | 0.02                     | -0.03 | 0.24  |
| $^3\mathbf{PC}_{4+CH}$ | 0.56   | 1.06   | -0.55 | 0.17                     | 0.36 | 0.41  | 1.61         | 0.32   | 0.04 | 0.03                     | 0.00  | 0.00  |

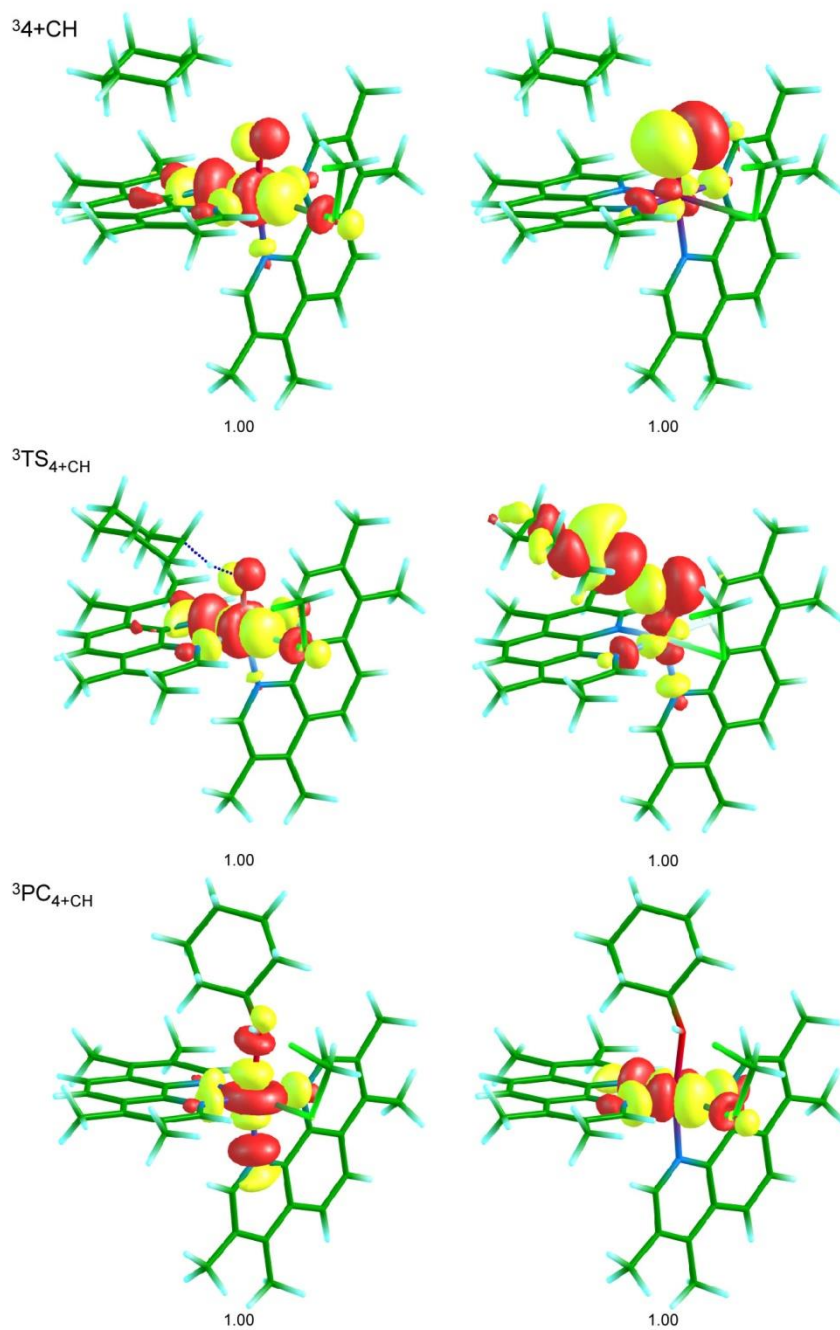

**Fig. S17** Singly-occupied natural orbitals (SNOs) of the reaction intermediates for hydroxylation of CHA by a  $Ni^{III}-O^{\bullet}$  species on the triplet spin states. Calculations were at the UB3LYP-D3(BJ)/B1 level in solvent. Positive values represent alpha-electron occupations.

## PART VII. Cartesian coordinates

<sup>1</sup>I

|    |              |              |              |                |              |              |              |
|----|--------------|--------------|--------------|----------------|--------------|--------------|--------------|
| Ni | -0.111674000 | 9.972307000  | 8.010846000  | H              | -3.464259000 | 12.292123000 | 4.557992000  |
| N  | 0.172478000  | 9.019660000  | 9.641503000  | H              | -2.787333000 | 12.161681000 | 2.930460000  |
| N  | -0.127923000 | 7.634416000  | 7.290886000  | C              | -0.085842000 | 12.375663000 | 3.911692000  |
| N  | -0.269089000 | 10.979920000 | 6.360505000  | C              | 0.032572000  | 13.119208000 | 2.610499000  |
| N  | 1.809445000  | 10.058841000 | 7.642784000  | H              | 0.642512000  | 14.020108000 | 2.735521000  |
| C  | 0.349119000  | 9.713259000  | 10.762779000 | H              | -0.937892000 | 13.421152000 | 2.220919000  |
| H  | 0.351656000  | 10.797889000 | 10.653271000 | H              | 0.524158000  | 12.498652000 | 1.853776000  |
| C  | 0.555268000  | 9.109441000  | 12.015856000 | C              | 1.087420000  | 11.899178000 | 4.562492000  |
| C  | 0.757633000  | 10.006903000 | 13.210396000 | C              | 2.423337000  | 12.072759000 | 4.061854000  |
| H  | 0.743459000  | 11.054946000 | 12.904267000 | H              | 2.569014000  | 12.600049000 | 3.127028000  |
| H  | 1.716758000  | 9.811489000  | 13.700283000 | C              | 3.510920000  | 11.590872000 | 4.734186000  |
| H  | -0.028843000 | 9.862520000  | 13.958252000 | H              | 4.500693000  | 11.744027000 | 4.321756000  |
| C  | 0.563905000  | 7.716803000  | 12.090019000 | C              | 3.375685000  | 10.884923000 | 5.978225000  |
| C  | 0.768318000  | 6.996432000  | 13.395144000 | C              | 4.463580000  | 10.358870000 | 6.730462000  |
| H  | -0.084539000 | 6.346922000  | 13.618142000 | C              | 5.870310000  | 10.531907000 | 6.229480000  |
| H  | 0.889235000  | 7.688480000  | 14.226633000 | H              | 5.986169000  | 10.080782000 | 5.238350000  |
| H  | 1.657874000  | 6.359041000  | 13.353113000 | H              | 6.601748000  | 10.076636000 | 6.894650000  |
| C  | 0.378463000  | 6.970391000  | 10.890238000 | H              | 6.116622000  | 11.594504000 | 6.131670000  |
| C  | 0.382714000  | 5.535764000  | 10.864528000 | C              | 4.176254000  | 9.692773000  | 7.924538000  |
| H  | 0.521511000  | 4.995468000  | 11.792607000 | C              | 5.245948000  | 9.097478000  | 8.804864000  |
| C  | 0.217841000  | 4.840137000  | 9.703927000  | H              | 4.803529000  | 8.624613000  | 9.684234000  |
| H  | 0.227388000  | 3.757281000  | 9.729078000  | H              | 5.946822000  | 9.862606000  | 9.152952000  |
| C  | 0.036820000  | 5.509911000  | 8.449016000  | H              | 5.826083000  | 8.338022000  | 8.271242000  |
| C  | -0.128457000 | 4.814072000  | 7.216361000  | C              | 2.832752000  | 9.570713000  | 8.333324000  |
| C  | -0.127532000 | 3.308193000  | 7.201111000  | H              | 2.597227000  | 9.059255000  | 9.257393000  |
| H  | -0.925093000 | 2.910777000  | 7.837676000  | C              | 2.072954000  | 10.707498000 | 6.479848000  |
| H  | 0.819166000  | 2.913642000  | 7.585341000  | C              | 0.939429000  | 11.209926000 | 5.779670000  |
| H  | -0.272025000 | 2.911458000  | 6.197506000  | Cl             | -2.307412000 | 10.093629000 | 8.507906000  |
| C  | -0.286588000 | 5.561768000  | 6.050191000  | Cl             | 0.842142000  | 13.041908000 | 9.830881000  |
| C  | -0.468462000 | 4.937863000  | 4.690006000  |                |              |              |              |
| H  | -1.364698000 | 4.310048000  | 4.651512000  | <sup>3</sup> I |              |              |              |
| H  | 0.383977000  | 4.306554000  | 4.418688000  |                |              |              |              |
| H  | -0.569510000 | 5.710133000  | 3.923914000  | Ni             | -0.215959000 | 10.230980000 | 8.301068000  |
| C  | -0.273812000 | 6.970720000  | 6.158674000  | N              | 0.136420000  | 9.188071000  | 10.094010000 |
| H  | -0.391625000 | 7.576182000  | 5.261682000  | N              | -0.229755000 | 8.195577000  | 7.621933000  |
| C  | 0.024999000  | 6.926990000  | 8.432711000  | N              | -0.272445000 | 10.977467000 | 6.334811000  |
| C  | 0.188432000  | 7.659849000  | 9.668266000  | N              | 1.860839000  | 10.205604000 | 7.775823000  |
| C  | -1.355978000 | 11.429696000 | 5.742183000  | C              | 0.313292000  | 9.703280000  | 11.301937000 |
| H  | -2.295685000 | 11.229506000 | 6.242356000  | H              | 0.263631000  | 10.786699000 | 11.355078000 |
| C  | -1.319507000 | 12.131313000 | 4.519288000  | C              | 0.561270000  | 8.930240000  | 12.455543000 |
| C  | -2.626794000 | 12.591059000 | 3.924472000  | C              | 0.746799000  | 9.641371000  | 13.772169000 |
| H  | -2.656761000 | 13.680339000 | 3.821028000  | H              | 0.664225000  | 10.722187000 | 13.639000000 |
|    |              |              |              | H              | 1.728786000  | 9.430873000  | 14.207983000 |

|   |              |              |              |               |              |              |              |
|---|--------------|--------------|--------------|---------------|--------------|--------------|--------------|
| H | -0.008345000 | 9.335567000  | 14.503485000 | H             | 6.614830000  | 9.914957000  | 6.893196000  |
| C | 0.626788000  | 7.542368000  | 12.325805000 | H             | 6.144733000  | 11.255856000 | 5.844592000  |
| C | 0.888972000  | 6.644885000  | 13.505134000 | C             | 4.225283000  | 9.809012000  | 8.049652000  |
| H | 0.060043000  | 5.944383000  | 13.652156000 | C             | 5.307986000  | 9.342249000  | 8.989485000  |
| H | 1.017884000  | 7.209634000  | 14.426876000 | H             | 4.883094000  | 9.064028000  | 9.956622000  |
| H | 1.792678000  | 6.046871000  | 13.346918000 | H             | 6.053793000  | 10.124221000 | 9.164873000  |
| C | 0.438209000  | 6.974694000  | 11.032844000 | H             | 5.835970000  | 8.469265000  | 8.592454000  |
| C | 0.487987000  | 5.563611000  | 10.772786000 | C             | 2.891960000  | 9.821236000  | 8.509590000  |
| H | 0.674427000  | 4.883204000  | 11.594797000 | H             | 2.665768000  | 9.503303000  | 9.522389000  |
| C | 0.307192000  | 5.060375000  | 9.517240000  | C             | 2.084310000  | 10.617978000 | 6.506611000  |
| H | 0.353140000  | 3.989117000  | 9.363394000  | C             | 0.941823000  | 11.035045000 | 5.735164000  |
| C | 0.057336000  | 5.917158000  | 8.392873000  | Cl            | -2.657034000 | 10.125764000 | 8.563755000  |
| C | -0.133322000 | 5.436848000  | 7.065605000  | Cl            | 0.091952000  | 12.463388000 | 9.282195000  |
| C | -0.077437000 | 3.958147000  | 6.790416000  |               |              |              |              |
| H | -0.824805000 | 3.422938000  | 7.385407000  | <sup>51</sup> |              |              |              |
| H | 0.902383000  | 3.549352000  | 7.059786000  | Ni            | -0.596126000 | 10.594781000 | 8.511435000  |
| H | -0.258932000 | 3.730807000  | 5.741308000  | N             | -0.243462000 | 9.445735000  | 10.249017000 |
| C | -0.367376000 | 6.367508000  | 6.052264000  | N             | -0.424443000 | 8.569964000  | 7.718394000  |
| C | -0.578685000 | 5.977894000  | 4.611162000  | N             | -0.521023000 | 11.339713000 | 6.535785000  |
| H | -1.450397000 | 5.326019000  | 4.494408000  | N             | 1.517231000  | 10.373172000 | 7.992124000  |
| H | 0.287106000  | 5.442223000  | 4.208687000  | C             | -0.239298000 | 9.867372000  | 11.506921000 |
| H | -0.739683000 | 6.864136000  | 3.993113000  | H             | -0.648124000 | 10.860094000 | 11.665307000 |
| C | -0.406274000 | 7.735230000  | 6.394465000  | C             | 0.286707000  | 9.123065000  | 12.586949000 |
| H | -0.591704000 | 8.479028000  | 5.626059000  | C             | 0.211810000  | 9.712534000  | 13.972557000 |
| C | 0.001413000  | 7.311137000  | 8.619836000  | H             | -0.257019000 | 10.698437000 | 13.944896000 |
| C | 0.192745000  | 7.842081000  | 9.944952000  | H             | 1.206152000  | 9.826174000  | 14.415575000 |
| C | -1.340376000 | 11.358011000 | 5.649234000  | H             | -0.377601000 | 9.081114000  | 14.645447000 |
| H | -2.282892000 | 11.283291000 | 6.183184000  | C             | 0.875053000  | 7.887425000  | 12.318465000 |
| C | -1.292837000 | 11.820686000 | 4.317354000  | C             | 1.492653000  | 7.047525000  | 13.401141000 |
| C | -2.582900000 | 12.224334000 | 3.649269000  | H             | 1.097066000  | 6.027471000  | 13.376970000 |
| H | -2.562007000 | 13.273604000 | 3.337645000  | H             | 1.307639000  | 7.458242000  | 14.392139000 |
| H | -3.425043000 | 12.095411000 | 4.332485000  | H             | 2.577438000  | 6.977632000  | 13.261793000 |
| H | -2.779804000 | 11.621682000 | 2.756660000  | C             | 0.901442000  | 7.427754000  | 10.964514000 |
| C | -0.054332000 | 11.881380000 | 3.676917000  | C             | 1.537645000  | 6.236218000  | 10.545181000 |
| C | 0.084272000  | 12.358204000 | 2.256325000  | H             | 2.020347000  | 5.599110000  | 11.275979000 |
| H | 0.732147000  | 13.239747000 | 2.204195000  | C             | 1.607276000  | 5.883585000  | 9.195344000  |
| H | -0.876929000 | 12.622413000 | 1.818789000  | H             | 2.156443000  | 4.990249000  | 8.923137000  |
| H | 0.539976000  | 11.585273000 | 1.628480000  | C             | 0.986850000  | 6.646641000  | 8.184600000  |
| C | 1.102823000  | 11.478036000 | 4.403449000  | C             | 1.081325000  | 6.350647000  | 6.781040000  |
| C | 2.429549000  | 11.496421000 | 3.854964000  | C             | 1.940239000  | 5.206929000  | 6.323568000  |
| H | 2.573190000  | 11.833576000 | 2.835537000  | H             | 1.569544000  | 4.248812000  | 6.708710000  |
| C | 3.512383000  | 11.102184000 | 4.586211000  | H             | 2.969041000  | 5.318665000  | 6.685871000  |
| H | 4.496427000  | 11.133240000 | 4.134222000  | H             | 1.976803000  | 5.135499000  | 5.237124000  |
| C | 3.379501000  | 10.648506000 | 5.941791000  | C             | 0.353568000  | 7.151168000  | 5.894208000  |
| C | 4.479734000  | 10.228502000 | 6.743070000  | C             | 0.363608000  | 6.931919000  | 4.403251000  |
| C | 5.871385000  | 10.246773000 | 6.170410000  | H             | 0.038865000  | 5.921036000  | 4.137296000  |
| H | 5.939825000  | 9.594760000  | 5.293000000  |               |              |              |              |

|    |              |              |              |   |              |              |              |
|----|--------------|--------------|--------------|---|--------------|--------------|--------------|
| H  | 1.368984000  | 7.074985000  | 3.993706000  | N | 2.417239000  | 10.067739000 | 7.371049000  |
| H  | -0.298440000 | 7.643340000  | 3.904752000  | C | 0.898948000  | 9.211755000  | 10.189320000 |
| C  | -0.408808000 | 8.212403000  | 6.404946000  | H | 1.554785000  | 10.063886000 | 10.076790000 |
| H  | -1.044736000 | 8.795180000  | 5.749817000  | C | 0.536910000  | 8.781758000  | 11.480478000 |
| C  | 0.256048000  | 7.809513000  | 8.581829000  | C | 1.081182000  | 9.544713000  | 12.660867000 |
| C  | 0.298177000  | 8.240530000  | 9.965026000  | H | 1.692492000  | 10.385893000 | 12.329254000 |
| C  | -1.506042000 | 11.903167000 | 5.848092000  | H | 1.701902000  | 8.905338000  | 13.296075000 |
| H  | -2.377150000 | 12.185761000 | 6.430187000  | H | 0.272065000  | 9.941713000  | 13.281188000 |
| C  | -1.477975000 | 12.103206000 | 4.449649000  | C | -0.300147000 | 7.668992000  | 11.615646000 |
| C  | -2.656784000 | 12.776574000 | 3.793959000  | C | -0.705438000 | 7.132467000  | 12.957297000 |
| H  | -2.359528000 | 13.700400000 | 3.287137000  | H | -1.794555000 | 7.161983000  | 13.065047000 |
| H  | -3.413946000 | 13.033002000 | 4.537869000  | H | -0.265660000 | 7.698174000  | 13.776098000 |
| H  | -3.125627000 | 12.128195000 | 3.047080000  | H | -0.397281000 | 6.086842000  | 13.061005000 |
| C  | -0.372307000 | 11.643356000 | 3.734398000  | C | -0.792767000 | 7.052525000  | 10.429556000 |
| C  | -0.278790000 | 11.777051000 | 2.240314000  | C | -1.682143000 | 5.924057000  | 10.402070000 |
| H  | 0.660493000  | 12.258022000 | 1.950216000  | H | -1.990695000 | 5.476412000  | 11.338127000 |
| H  | -1.099380000 | 12.363407000 | 1.830758000  | C | -2.157168000 | 5.413439000  | 9.227070000  |
| H  | -0.298060000 | 10.790521000 | 1.763393000  | H | -2.827171000 | 4.563621000  | 9.250962000  |
| C  | 0.687667000  | 11.010642000 | 4.456047000  | C | -1.814870000 | 5.995670000  | 7.959416000  |
| C  | 1.820925000  | 10.423446000 | 3.846080000  | C | -2.309000000 | 5.546206000  | 6.701715000  |
| H  | 1.933876000  | 10.464322000 | 2.769688000  | C | -3.255990000 | 4.383567000  | 6.647582000  |
| C  | 2.778732000  | 9.737392000  | 4.596491000  | H | -4.153425000 | 4.600982000  | 7.235386000  |
| H  | 3.595628000  | 9.255300000  | 4.073016000  | H | -2.793648000 | 3.489287000  | 7.077987000  |
| C  | 2.718398000  | 9.658409000  | 6.002872000  | H | -3.564464000 | 4.150566000  | 5.630578000  |
| C  | 3.649228000  | 8.915206000  | 6.808078000  | C | -1.887911000 | 6.218927000  | 5.550532000  |
| C  | 4.714625000  | 8.095496000  | 6.138779000  | C | -2.335427000 | 5.823376000  | 4.167168000  |
| H  | 4.275132000  | 7.399055000  | 5.415274000  | H | -3.422390000 | 5.903221000  | 4.066667000  |
| H  | 5.287770000  | 7.510456000  | 6.857283000  | H | -2.057094000 | 4.790325000  | 3.938889000  |
| H  | 5.420148000  | 8.727811000  | 5.585162000  | H | -1.881641000 | 6.469083000  | 3.412878000  |
| C  | 3.516479000  | 8.991883000  | 8.197945000  | C | -1.026619000 | 7.326577000  | 5.680613000  |
| C  | 4.439596000  | 8.269804000  | 9.145079000  | H | -0.696942000 | 7.853850000  | 4.795360000  |
| H  | 4.187837000  | 8.503386000  | 10.181933000 | C | -0.949369000 | 7.102798000  | 7.974210000  |
| H  | 5.487177000  | 8.540218000  | 8.979574000  | C | -0.405269000 | 7.592514000  | 9.191092000  |
| H  | 4.354663000  | 7.184942000  | 9.021774000  | C | -0.562979000 | 10.400099000 | 4.845975000  |
| C  | 2.472306000  | 9.756837000  | 8.740939000  | H | -1.461535000 | 9.871724000  | 5.138625000  |
| H  | 2.395541000  | 9.898283000  | 9.812060000  | C | -0.582966000 | 11.266016000 | 3.734170000  |
| C  | 1.637414000  | 10.323625000 | 6.661927000  | C | -1.865305000 | 11.376903000 | 2.949522000  |
| C  | 0.574888000  | 10.912821000 | 5.870458000  | H | -2.207186000 | 12.414386000 | 2.891728000  |
| Cl | -3.029436000 | 10.544880000 | 8.608381000  | H | -2.655517000 | 10.787666000 | 3.418754000  |
| Cl | -0.315366000 | 12.738393000 | 9.628198000  | H | -1.737451000 | 11.013951000 | 1.924678000  |
|    |              |              |              | C | 0.573430000  | 11.980064000 | 3.403035000  |
|    |              |              |              | C | 0.635328000  | 12.891915000 | 2.211531000  |
| Ni | 0.678777000  | 9.208060000  | 7.239486000  | H | 0.785767000  | 13.929421000 | 2.529649000  |
| N  | 0.470229000  | 8.627080000  | 9.072869000  | H | -0.273734000 | 12.850104000 | 1.614844000  |
| N  | -0.590821000 | 7.783827000  | 6.851042000  | H | 1.478750000  | 12.625631000 | 1.566777000  |
| N  | 0.515287000  | 10.219718000 | 5.605657000  | C | 1.708603000  | 11.849754000 | 4.254210000  |
|    |              |              |              | C | 2.947497000  | 12.559522000 | 4.088704000  |



|    |              |              |              |   |              |              |              |
|----|--------------|--------------|--------------|---|--------------|--------------|--------------|
| H  | 3.059054000  | 13.231146000 | 3.246486000  | C | 0.083836000  | 10.129949000 | 10.944016000 |
| C  | 3.985039000  | 12.408193000 | 4.966034000  | H | 0.342738000  | 11.183022000 | 10.958777000 |
| H  | 4.904562000  | 12.955309000 | 4.799211000  | C | -0.035043000 | 9.419715000  | 12.154699000 |
| C  | 3.884235000  | 11.549284000 | 6.114301000  | C | 0.195340000  | 10.157931000 | 13.448011000 |
| C  | 4.918567000  | 11.347334000 | 7.072999000  | H | 0.442806000  | 11.204224000 | 13.257188000 |
| C  | 6.225306000  | 12.070892000 | 6.923720000  | H | 1.018731000  | 9.716079000  | 14.017420000 |
| H  | 6.693254000  | 11.826947000 | 5.964347000  | H | -0.694578000 | 10.134284000 | 14.084534000 |
| H  | 6.927442000  | 11.820412000 | 7.716278000  | C | -0.361588000 | 8.062144000  | 12.102902000 |
| H  | 6.065935000  | 13.154227000 | 6.939855000  | C | -0.521976000 | 7.233533000  | 13.345776000 |
| C  | 4.674701000  | 10.463161000 | 8.128452000  | H | -1.528262000 | 6.803898000  | 13.388773000 |
| C  | 5.697337000  | 10.162436000 | 9.193039000  | H | -0.363021000 | 7.815952000  | 14.251129000 |
| H  | 5.307154000  | 9.440347000  | 9.912955000  | H | 0.187521000  | 6.399558000  | 13.349813000 |
| H  | 5.970059000  | 11.069130000 | 9.742284000  | C | -0.557112000 | 7.461295000  | 10.825819000 |
| H  | 6.613432000  | 9.748045000  | 8.762162000  | C | -0.887858000 | 6.075990000  | 10.643303000 |
| C  | 3.410329000  | 9.850997000  | 8.230923000  | H | -0.977494000 | 5.437913000  | 11.512690000 |
| H  | 3.211965000  | 9.168792000  | 9.047005000  | C | -1.108008000 | 5.549985000  | 9.403922000  |
| C  | 2.669263000  | 10.866980000 | 6.296757000  | H | -1.366924000 | 4.502972000  | 9.310546000  |
| C  | 1.615319000  | 10.976922000 | 5.351046000  | C | -1.022637000 | 6.356712000  | 8.220611000  |
| C  | -3.289821000 | 9.336464000  | 7.628850000  | C | -1.299255000 | 5.871778000  | 6.910254000  |
| C  | -4.112364000 | 8.401903000  | 8.438983000  | C | -1.692122000 | 4.434647000  | 6.717400000  |
| C  | -4.011009000 | 8.338361000  | 9.834860000  | H | -2.603145000 | 4.209886000  | 7.280866000  |
| C  | -4.776796000 | 7.398235000  | 10.514936000 | H | -0.907532000 | 3.765773000  | 7.085537000  |
| C  | -5.639406000 | 6.532472000  | 9.844134000  | H | -1.875665000 | 4.196909000  | 5.671564000  |
| C  | -5.736655000 | 6.615788000  | 8.453161000  | C | -1.211259000 | 6.763467000  | 5.836926000  |
| C  | -4.975416000 | 7.542808000  | 7.747401000  | C | -1.508102000 | 6.364736000  | 4.414722000  |
| O  | -3.292532000 | 9.412866000  | 6.419379000  | H | -2.536073000 | 6.003031000  | 4.312033000  |
| O  | -2.492618000 | 10.084732000 | 8.440724000  | H | -0.841924000 | 5.566211000  | 4.074216000  |
| Cl | -4.625061000 | 7.281309000  | 12.259934000 | H | -1.384219000 | 7.215613000  | 3.741690000  |
| H  | -3.342501000 | 8.992916000  | 10.377755000 | C | -0.849711000 | 8.098287000  | 6.099604000  |
| H  | -6.221344000 | 5.805810000  | 10.398698000 | H | -0.781459000 | 8.815498000  | 5.289566000  |
| H  | -6.410513000 | 5.950410000  | 7.924506000  | C | -0.677343000 | 7.715292000  | 8.374312000  |
| H  | -5.030346000 | 7.608410000  | 6.667522000  | C | -0.433290000 | 8.269171000  | 9.676306000  |
| O  | -1.652531000 | 10.945265000 | 7.642566000  | C | -0.924865000 | 11.789973000 | 5.271966000  |
| H  | -1.276250000 | 11.483076000 | 8.368181000  | H | -1.906905000 | 11.793801000 | 5.731811000  |
| Cl | 2.761950000  | 12.598017000 | 10.301507000 | C | -0.740758000 | 12.298312000 | 3.971275000  |
| C  | 1.355820000  | 13.159442000 | 9.350866000  | C | -1.932969000 | 12.872370000 | 3.249911000  |
| H  | 1.419642000  | 12.730445000 | 8.355455000  | H | -1.779197000 | 13.927030000 | 3.000987000  |
| H  | 1.361864000  | 14.244992000 | 9.334012000  | H | -2.829100000 | 12.801474000 | 3.869804000  |
| Cl | -0.205279000 | 12.632812000 | 10.082359000 | H | -2.128428000 | 12.339115000 | 2.314497000  |
|    |              |              |              | C | 0.536471000  | 12.245327000 | 3.406052000  |
|    |              |              |              | C | 0.815211000  | 12.768673000 | 2.024801000  |
|    |              |              |              | H | 1.589624000  | 13.542106000 | 2.053674000  |
| Ni | -0.026053000 | 10.455341000 | 7.874398000  | H | -0.071760000 | 13.196815000 | 1.561964000  |
| N  | -0.108903000 | 9.588109000  | 9.746460000  | H | 1.182820000  | 11.967206000 | 1.375323000  |
| N  | -0.598937000 | 8.561125000  | 7.317539000  | C | 1.593134000  | 11.667602000 | 4.168754000  |
| N  | 0.056913000  | 11.264670000 | 5.997924000  | C | 2.941570000  | 11.534595000 | 3.692542000  |
| N  | 1.974923000  | 10.139850000 | 7.497052000  | H | 3.187976000  | 11.897699000 | 2.702632000  |

|                               |              |              |              |   |              |              |              |
|-------------------------------|--------------|--------------|--------------|---|--------------|--------------|--------------|
| C                             | 3.916366000  | 10.957255000 | 4.454072000  | H | 1.454586000  | 10.217830000 | 10.121255000 |
| H                             | 4.920007000  | 10.873159000 | 4.056475000  | C | 0.650417000  | 8.786438000  | 11.523245000 |
| C                             | 3.643466000  | 10.454520000 | 5.771236000  | C | 1.217963000  | 9.530200000  | 12.703392000 |
| C                             | 4.621660000  | 9.834674000  | 6.602307000  | H | 1.748368000  | 10.426031000 | 12.376796000 |
| C                             | 6.031874000  | 9.682865000  | 6.104521000  | H | 1.919439000  | 8.904947000  | 13.263697000 |
| H                             | 6.052682000  | 9.112528000  | 5.170220000  | H | 0.424921000  | 9.840412000  | 13.390003000 |
| H                             | 6.668482000  | 9.173010000  | 6.824906000  | C | -0.104370000 | 7.612399000  | 11.652601000 |
| H                             | 6.474427000  | 10.662590000 | 5.895412000  | C | -0.388041000 | 6.993436000  | 12.986888000 |
| C                             | 4.232622000  | 9.382919000  | 7.867032000  | H | -1.468085000 | 6.958804000  | 13.163324000 |
| C                             | 5.183127000  | 8.713549000  | 8.826034000  | H | 0.075609000  | 7.542529000  | 13.803256000 |
| H                             | 4.672134000  | 8.449010000  | 9.754150000  | H | -0.021359000 | 5.961988000  | 13.014247000 |
| H                             | 6.021908000  | 9.369094000  | 9.079401000  | C | -0.640412000 | 7.019018000  | 10.470094000 |
| H                             | 5.599854000  | 7.796078000  | 8.398878000  | C | -1.472215000 | 5.854846000  | 10.449685000 |
| C                             | 2.892577000  | 9.562786000  | 8.262138000  | H | -1.678041000 | 5.336687000  | 11.376795000 |
| H                             | 2.560418000  | 9.225469000  | 9.238556000  | C | -2.035007000 | 5.394675000  | 9.286789000  |
| C                             | 2.328681000  | 10.582331000 | 6.264077000  | H | -2.653241000 | 4.507743000  | 9.321504000  |
| C                             | 1.302826000  | 11.190139000 | 5.462910000  | C | -1.821882000 | 6.052390000  | 8.032416000  |
| C                             | -3.461788000 | 9.451977000  | 7.643100000  | C | -2.409707000 | 5.662823000  | 6.791417000  |
| C                             | -3.982430000 | 8.176960000  | 8.188304000  | C | -3.345973000 | 4.497672000  | 6.699404000  |
| C                             | -3.914883000 | 7.870694000  | 9.555556000  | H | -3.826626000 | 4.272253000  | 7.649548000  |
| C                             | -4.337261000 | 6.616358000  | 9.977057000  | H | -2.794224000 | 3.605659000  | 6.376903000  |
| C                             | -4.819468000 | 5.666937000  | 9.074092000  | H | -4.126415000 | 4.679732000  | 5.958724000  |
| C                             | -4.889430000 | 5.991111000  | 7.718002000  | C | -2.062922000 | 6.383383000  | 5.639941000  |
| C                             | -4.473092000 | 7.241615000  | 7.269207000  | C | -2.608071000 | 6.030265000  | 4.283701000  |
| O                             | -3.479435000 | 9.813026000  | 6.493150000  | H | -3.695173000 | 6.161916000  | 4.256655000  |
| O                             | -2.859268000 | 10.170866000 | 8.662605000  | H | -2.397240000 | 4.987301000  | 4.030037000  |
| Cl                            | -4.239879000 | 6.216210000  | 11.681358000 | H | -2.173908000 | 6.665743000  | 3.510032000  |
| H                             | -3.530363000 | 8.583570000  | 10.272411000 | C | -1.199891000 | 7.484423000  | 5.754371000  |
| H                             | -5.133852000 | 4.691965000  | 9.427702000  | H | -0.941160000 | 8.055022000  | 4.873291000  |
| H                             | -5.265039000 | 5.258624000  | 7.012212000  | C | -0.958818000 | 7.165367000  | 8.029891000  |
| H                             | -4.505369000 | 7.499848000  | 6.217809000  | C | -0.362317000 | 7.626710000  | 9.231602000  |
| O                             | -2.078202000 | 11.238216000 | 8.092790000  | C | -0.583720000 | 10.514579000 | 4.912077000  |
| H                             | -2.197155000 | 11.937498000 | 8.772313000  | H | -1.524581000 | 10.116398000 | 5.285903000  |
| Cl                            | 1.056767000  | 12.840595000 | 8.772500000  | C | -0.540479000 | 11.289759000 | 3.736559000  |
| C                             | -0.161832000 | 14.166672000 | 8.782382000  | C | -1.822721000 | 11.462059000 | 2.963928000  |
| H                             | -0.545146000 | 14.275596000 | 7.772130000  | H | -2.053615000 | 12.520142000 | 2.811523000  |
| H                             | 0.336387000  | 15.062780000 | 9.139495000  | H | -2.656668000 | 11.006237000 | 3.500777000  |
| Cl                            | -1.532112000 | 13.811448000 | 9.882080000  | H | -1.757412000 | 10.991622000 | 1.977420000  |
|                               |              |              |              | C | 0.670087000  | 11.873830000 | 3.340816000  |
|                               |              |              |              | C | 0.782530000  | 12.687100000 | 2.085241000  |
|                               |              |              |              | H | 0.889232000  | 13.750623000 | 2.328632000  |
|                               |              |              |              | H | -0.091779000 | 12.574275000 | 1.447028000  |
|                               |              |              |              | H | 1.666076000  | 12.394784000 | 1.511003000  |
|                               |              |              |              | C | 1.802219000  | 11.723149000 | 4.194867000  |
|                               |              |              |              | C | 3.083767000  | 12.339901000 | 3.993668000  |
|                               |              |              |              | H | 3.243948000  | 12.942364000 | 3.108250000  |
|                               |              |              |              | C | 4.102236000  | 12.191850000 | 4.895768000  |
| <sup>1</sup> TS <sub>23</sub> |              |              |              |   |              |              |              |
| Ni                            | 0.544821000  | 9.415129000  | 7.340656000  |   |              |              |              |
| N                             | 0.434609000  | 8.722368000  | 9.124475000  |   |              |              |              |
| N                             | -0.661519000 | 7.872283000  | 6.909569000  |   |              |              |              |
| N                             | 0.502017000  | 10.289908000 | 5.646969000  |   |              |              |              |
| N                             | 2.390429000  | 10.094024000 | 7.417731000  |   |              |              |              |
| C                             | 0.889134000  | 9.302806000  | 10.239286000 |   |              |              |              |

|    |              |              |              |   |              |              |              |
|----|--------------|--------------|--------------|---|--------------|--------------|--------------|
| H  | 5.055386000  | 12.667142000 | 4.700916000  | C | 0.372747000  | 9.686603000  | 12.198551000 |
| C  | 3.940742000  | 11.425865000 | 6.100262000  | C | 0.741529000  | 10.480098000 | 13.425077000 |
| C  | 4.947673000  | 11.238695000 | 7.091105000  | H | 1.060769000  | 11.487939000 | 13.153122000 |
| C  | 6.286953000  | 11.892660000 | 6.927330000  | H | 1.558969000  | 10.004024000 | 13.974774000 |
| H  | 6.801811000  | 11.489557000 | 6.048061000  | H | -0.108832000 | 10.569565000 | 14.107797000 |
| H  | 6.927488000  | 11.741376000 | 7.793481000  | C | -0.072836000 | 8.361755000  | 12.254521000 |
| H  | 6.171417000  | 12.969292000 | 6.769368000  | C | -0.222589000 | 7.631010000  | 13.557816000 |
| C  | 4.648746000  | 10.423933000 | 8.191047000  | H | -1.256150000 | 7.295543000  | 13.692367000 |
| C  | 5.651600000  | 10.118129000 | 9.273105000  | H | 0.045342000  | 8.252007000  | 14.410013000 |
| H  | 5.228525000  | 9.438303000  | 10.014965000 | H | 0.412373000  | 6.739103000  | 13.573653000 |
| H  | 5.959041000  | 11.031406000 | 9.792046000  | C | -0.389844000 | 7.698615000  | 11.033717000 |
| H  | 6.550559000  | 9.651632000  | 8.860416000  | C | -0.845105000 | 6.338553000  | 10.956914000 |
| C  | 3.357094000  | 9.880259000  | 8.310770000  | H | -0.961897000 | 5.772168000  | 11.871958000 |
| H  | 3.121181000  | 9.253395000  | 9.158724000  | C | -1.136170000 | 5.745125000  | 9.762337000  |
| C  | 2.691080000  | 10.818022000 | 6.305471000  | H | -1.484957000 | 4.720584000  | 9.752015000  |
| C  | 1.656475000  | 10.935010000 | 5.347683000  | C | -1.004217000 | 6.451708000  | 8.520117000  |
| C  | -3.440568000 | 9.730660000  | 7.517813000  | C | -1.329204000 | 5.898760000  | 7.247336000  |
| C  | -4.143956000 | 8.625941000  | 8.279032000  | C | -1.837378000 | 4.488058000  | 7.159603000  |
| C  | -3.949713000 | 8.494027000  | 9.661044000  | H | -2.743497000 | 4.369553000  | 7.760514000  |
| C  | -4.521976000 | 7.410988000  | 10.314294000 | H | -1.092812000 | 3.785429000  | 7.548060000  |
| C  | -5.306141000 | 6.475443000  | 9.633087000  | H | -2.073566000 | 4.200627000  | 6.137225000  |
| C  | -5.520464000 | 6.639362000  | 8.260581000  | C | -1.180397000 | 6.702701000  | 6.113705000  |
| C  | -4.943800000 | 7.707547000  | 7.580892000  | C | -1.537730000 | 6.235649000  | 4.727301000  |
| O  | -3.220166000 | 9.592360000  | 6.307317000  | H | -2.601976000 | 5.987249000  | 4.664481000  |
| O  | -3.146868000 | 10.730448000 | 8.275073000  | H | -0.970499000 | 5.344629000  | 4.442805000  |
| Cl | -4.244554000 | 7.205578000  | 12.035881000 | H | -1.332225000 | 7.016025000  | 3.991925000  |
| H  | -3.347212000 | 9.216191000  | 10.195954000 | C | -0.708106000 | 8.020741000  | 6.276994000  |
| H  | -5.745431000 | 5.641482000  | 10.167823000 | H | -0.592964000 | 8.670940000  | 5.417701000  |
| H  | -6.136480000 | 5.922450000  | 7.728827000  | C | -0.556571000 | 7.786160000  | 8.572581000  |
| H  | -5.085924000 | 7.840530000  | 6.515024000  | C | -0.254337000 | 8.410846000  | 9.824604000  |
| O  | -0.766559000 | 10.722517000 | 7.820313000  | C | -0.937039000 | 11.730135000 | 5.482096000  |
| H  | -1.137006000 | 10.477504000 | 8.685236000  | H | -1.888894000 | 11.721065000 | 5.997335000  |
| Cl | 2.146149000  | 12.899616000 | 9.430602000  | C | -0.818282000 | 12.219324000 | 4.165056000  |
| C  | 0.371243000  | 13.184462000 | 9.384343000  | C | -2.053389000 | 12.770420000 | 3.500372000  |
| H  | -0.020275000 | 12.689058000 | 8.499804000  | H | -1.929075000 | 13.827328000 | 3.244947000  |
| H  | 0.201748000  | 14.256616000 | 9.402169000  | H | -2.917604000 | 12.682874000 | 4.161296000  |
| Cl | -0.466237000 | 12.459894000 | 10.799358000 | H | -2.280692000 | 12.231463000 | 2.575692000  |
|    |              |              |              | C | 0.428235000  | 12.173178000 | 3.532087000  |
|    |              |              |              | C | 0.628427000  | 12.682190000 | 2.133468000  |
|    |              |              |              | H | 1.404811000  | 13.453724000 | 2.112781000  |
| Ni | 0.118333000  | 10.467479000 | 7.966769000  | H | -0.282259000 | 13.107153000 | 1.716497000  |
| N  | 0.164494000  | 9.704860000  | 9.800561000  | H | 0.959069000  | 11.872438000 | 1.474272000  |
| N  | -0.412336000 | 8.541272000  | 7.458380000  | C | 1.532065000  | 11.616767000 | 4.243070000  |
| N  | 0.093454000  | 11.221668000 | 6.147585000  | C | 2.861751000  | 11.485004000 | 3.714401000  |
| N  | 2.051461000  | 10.155746000 | 7.568869000  | H | 3.063339000  | 11.831967000 | 2.708626000  |
| C  | 0.470868000  | 10.313294000 | 10.943238000 | C | 3.873994000  | 10.929172000 | 4.445149000  |
| H  | 0.805162000  | 11.340969000 | 10.872132000 | H | 4.861204000  | 10.848271000 | 4.007682000  |

<sup>3</sup>TS<sub>23</sub>

|    |              |              |              |   |              |              |              |
|----|--------------|--------------|--------------|---|--------------|--------------|--------------|
| C  | 3.662803000  | 10.446318000 | 5.781734000  | C | -0.411457000 | 9.998705000  | 12.928380000 |
| C  | 4.670188000  | 9.851588000  | 6.595783000  | H | -0.287049000 | 11.062854000 | 12.723946000 |
| C  | 6.064066000  | 9.698833000  | 6.058316000  | H | 0.451124000  | 9.664659000  | 13.512806000 |
| H  | 6.058489000  | 9.102505000  | 5.140150000  | H | -1.306219000 | 9.870249000  | 13.543141000 |
| H  | 6.729354000  | 9.216508000  | 6.771378000  | C | -0.681122000 | 7.828064000  | 11.608190000 |
| H  | 6.486982000  | 10.677124000 | 5.806531000  | C | -0.794101000 | 7.011219000  | 12.860800000 |
| C  | 4.321352000  | 9.424746000  | 7.882405000  | H | -1.773843000 | 6.523261000  | 12.903754000 |
| C  | 5.306740000  | 8.783912000  | 8.825476000  | H | -0.678690000 | 7.616493000  | 13.756949000 |
| H  | 4.827656000  | 8.532851000  | 9.773850000  | H | -0.035608000 | 6.222466000  | 12.877794000 |
| H  | 6.145088000  | 9.453783000  | 9.038926000  | C | -0.751867000 | 7.180845000  | 10.340294000 |
| H  | 5.718829000  | 7.862717000  | 8.402358000  | C | -0.919420000 | 5.768917000  | 10.134003000 |
| C  | 2.993620000  | 9.598449000  | 8.320175000  | H | -1.002182000 | 5.120058000  | 10.996709000 |
| H  | 2.697591000  | 9.275008000  | 9.311059000  | C | -0.982365000 | 5.225871000  | 8.881483000  |
| C  | 2.367367000  | 10.573471000 | 6.315136000  | H | -1.112692000 | 4.156274000  | 8.784359000  |
| C  | 1.313138000  | 11.153327000 | 5.552054000  | C | -0.889483000 | 6.031717000  | 7.692809000  |
| C  | -3.445476000 | 9.327707000  | 7.399590000  | C | -0.973544000 | 5.559006000  | 6.352327000  |
| C  | -4.156415000 | 8.016725000  | 7.588933000  | C | -1.155747000 | 4.107260000  | 6.024843000  |
| C  | -4.148601000 | 7.353124000  | 8.822170000  | H | -1.261767000 | 3.478829000  | 6.906132000  |
| C  | -4.758137000 | 6.105885000  | 8.912135000  | H | -0.300648000 | 3.741493000  | 5.446066000  |
| C  | -5.375718000 | 5.513506000  | 7.810037000  | H | -2.043407000 | 3.970195000  | 5.399000000  |
| C  | -5.376947000 | 6.190675000  | 6.588231000  | C | -0.885916000 | 6.492007000  | 5.307078000  |
| C  | -4.771838000 | 7.439387000  | 6.472075000  | C | -0.960787000 | 6.071477000  | 3.865526000  |
| O  | -3.206043000 | 9.796231000  | 6.298460000  | H | -1.922376000 | 5.595949000  | 3.645946000  |
| O  | -3.116358000 | 9.856991000  | 8.569352000  | H | -0.177757000 | 5.344356000  | 3.628081000  |
| Cl | -4.723242000 | 5.248840000  | 10.445043000 | H | -0.845089000 | 6.927770000  | 3.198940000  |
| H  | -3.661598000 | 7.790383000  | 9.683338000  | C | -0.736068000 | 7.856121000  | 5.607082000  |
| H  | -5.840119000 | 4.538905000  | 7.904995000  | H | -0.687784000 | 8.592800000  | 4.816147000  |
| H  | -5.850733000 | 5.734214000  | 5.725918000  | C | -0.724536000 | 7.416654000  | 7.884615000  |
| H  | -4.755053000 | 7.970275000  | 5.527977000  | C | -0.659325000 | 7.975659000  | 9.187222000  |
| O  | -1.694389000 | 11.028447000 | 8.246000000  | C | -1.439550000 | 11.358102000 | 5.008786000  |
| H  | -1.798214000 | 11.336362000 | 9.166508000  | H | -2.434358000 | 11.195624000 | 5.401380000  |
| Cl | 1.011555000  | 12.994587000 | 8.695225000  | C | -1.219041000 | 11.959579000 | 3.751891000  |
| C  | -0.496908000 | 13.962065000 | 8.931704000  | C | -2.424113000 | 12.389574000 | 2.956151000  |
| H  | -1.134360000 | 13.788046000 | 8.069913000  | H | -2.409430000 | 13.467786000 | 2.770717000  |
| H  | -0.197445000 | 15.000748000 | 9.032300000  | H | -3.345482000 | 12.151892000 | 3.490352000  |
| Cl | -1.375783000 | 13.467418000 | 10.405695000 | H | -2.455749000 | 11.885565000 | 1.985589000  |
|    |              |              |              | C | 0.093009000  | 12.134047000 | 3.293309000  |
|    |              |              |              | C | 0.394286000  | 12.774444000 | 1.969864000  |
|    |              |              |              | H | 1.029046000  | 13.655802000 | 2.107574000  |
|    |              |              |              | H | -0.507719000 | 13.083971000 | 1.446630000  |
|    |              |              |              | H | 0.941009000  | 12.078343000 | 1.325067000  |
|    |              |              |              | C | 1.166819000  | 11.683396000 | 4.115321000  |
|    |              |              |              | C | 2.563179000  | 11.782124000 | 3.788903000  |
|    |              |              |              | H | 2.850752000  | 12.235643000 | 2.848612000  |
|    |              |              |              | C | 3.533966000  | 11.316936000 | 4.632206000  |
|    |              |              |              | H | 4.573948000  | 11.410121000 | 4.345473000  |
|    |              |              |              | C | 3.213597000  | 10.700489000 | 5.890838000  |
| Ni | -0.516569000 | 10.159627000 | 7.525941000  |   |              |              |              |
| N  | -0.527482000 | 9.321787000  | 9.259335000  |   |              |              |              |
| N  | -0.660745000 | 8.299058000  | 6.857020000  |   |              |              |              |
| N  | -0.432843000 | 10.936686000 | 5.762428000  |   |              |              |              |
| N  | 1.423428000  | 10.035001000 | 7.373407000  |   |              |              |              |
| C  | -0.472838000 | 9.935954000  | 10.431979000 |   |              |              |              |
| H  | -0.387113000 | 11.014458000 | 10.401149000 |   |              |              |              |
| C  | -0.523721000 | 9.220185000  | 11.644469000 |   |              |              |              |

|    |              |              |              |   |              |              |              |
|----|--------------|--------------|--------------|---|--------------|--------------|--------------|
| C  | 4.164250000  | 10.185279000 | 6.818803000  | H | 0.046314000  | 11.454805000 | 12.940322000 |
| C  | 5.629612000  | 10.284926000 | 6.511628000  | H | 0.814422000  | 10.031219000 | 13.654402000 |
| H  | 5.861752000  | 9.761080000  | 5.578551000  | H | -0.938028000 | 10.229157000 | 13.749317000 |
| H  | 6.245718000  | 9.860725000  | 7.301336000  | C | -0.426048000 | 8.268829000  | 11.718864000 |
| H  | 5.920634000  | 11.331830000 | 6.377341000  | C | -0.495488000 | 7.408191000  | 12.946724000 |
| C  | 3.692819000  | 9.599226000  | 7.999207000  | H | -1.499406000 | 6.984754000  | 13.061254000 |
| C  | 4.607678000  | 9.027262000  | 9.050299000  | H | -0.258907000 | 7.965822000  | 13.850478000 |
| H  | 4.033537000  | 8.608950000  | 9.878675000  | H | 0.202985000  | 6.569590000  | 12.869852000 |
| H  | 5.267509000  | 9.799756000  | 9.456257000  | C | -0.588319000 | 7.679125000  | 10.431672000 |
| H  | 5.235530000  | 8.232076000  | 8.638134000  | C | -0.840811000 | 6.282194000  | 10.209377000 |
| C  | 2.304371000  | 9.547800000  | 8.236269000  | H | -0.897470000 | 5.618531000  | 11.062634000 |
| H  | 1.922755000  | 9.109177000  | 9.146588000  | C | -1.032068000 | 5.776327000  | 8.955487000  |
| C  | 1.851115000  | 10.603639000 | 6.218222000  | H | -1.235515000 | 4.720016000  | 8.836639000  |
| C  | 0.847918000  | 11.089337000 | 5.346653000  | C | -0.995564000 | 6.616474000  | 7.792402000  |
| C  | -3.209981000 | 9.439791000  | 7.356821000  | C | -1.241820000 | 6.163837000  | 6.463324000  |
| C  | -3.687952000 | 8.682626000  | 8.548954000  | C | -1.546587000 | 4.713470000  | 6.220853000  |
| C  | -3.651017000 | 9.260863000  | 9.823758000  | H | -2.444636000 | 4.415458000  | 6.771989000  |
| C  | -4.045866000 | 8.496059000  | 10.915792000 | H | -0.725457000 | 4.081880000  | 6.574783000  |
| C  | -4.454660000 | 7.169780000  | 10.769795000 | H | -1.709665000 | 4.498081000  | 5.166978000  |
| C  | -4.492359000 | 6.608180000  | 9.491694000  | C | -1.207343000 | 7.098457000  | 5.423675000  |
| C  | -4.129021000 | 7.363366000  | 8.380518000  | C | -1.476336000 | 6.732493000  | 3.987351000  |
| O  | -3.565713000 | 9.168281000  | 6.219954000  | H | -2.474649000 | 6.300418000  | 3.868919000  |
| O  | -2.367068000 | 10.457003000 | 7.617913000  | H | -0.752869000 | 5.997065000  | 3.622204000  |
| Cl | -4.010466000 | 9.209177000  | 12.520885000 | H | -1.413998000 | 7.613270000  | 3.345311000  |
| H  | -3.318540000 | 10.282856000 | 9.948005000  | C | -0.906695000 | 8.443499000  | 5.729141000  |
| H  | -4.738499000 | 6.589556000  | 11.640052000 | H | -0.860956000 | 9.188045000  | 4.941638000  |
| H  | -4.805482000 | 5.576955000  | 9.371038000  | C | -0.723327000 | 7.984467000  | 7.985897000  |
| H  | -4.152847000 | 6.938616000  | 7.383846000  | C | -0.519007000 | 8.512661000  | 9.298666000  |
| O  | -0.280042000 | 11.818089000 | 8.249203000  | C | -0.731226000 | 12.247021000 | 5.244746000  |
| H  | -1.184675000 | 12.175434000 | 8.269396000  | H | -1.689714000 | 12.399542000 | 5.729426000  |
| Cl | 2.687855000  | 11.518948000 | 10.974184000 | C | -0.448365000 | 12.750944000 | 3.958583000  |
| C  | 1.882325000  | 12.931243000 | 10.207660000 | C | -1.525191000 | 13.526230000 | 3.244302000  |
| H  | 1.451332000  | 12.604004000 | 9.264305000  | H | -1.197170000 | 14.545816000 | 3.020045000  |
| H  | 2.621129000  | 13.719123000 | 10.096571000 | H | -2.425935000 | 13.589830000 | 3.857500000  |
| Cl | 0.534066000  | 13.562283000 | 11.210342000 | H | -1.794806000 | 13.049878000 | 2.296781000  |
| 3  |              |              |              | C | 0.812375000  | 12.512380000 | 3.396581000  |
|    |              |              |              | C | 1.182416000  | 13.016205000 | 2.031267000  |
| Ni | -0.094096000 | 10.730685000 | 7.685042000  | H | 2.071823000  | 13.652292000 | 2.084880000  |
| N  | -0.276135000 | 9.845959000  | 9.405120000  | H | 0.381007000  | 13.592726000 | 1.574095000  |
| N  | -0.670507000 | 8.864993000  | 6.960517000  | H | 1.422043000  | 12.179562000 | 1.366398000  |
| N  | 0.156053000  | 11.554753000 | 5.943459000  | C | 1.764755000  | 11.766979000 | 4.151755000  |
| N  | 1.796761000  | 10.180730000 | 7.457849000  | C | 3.094382000  | 11.440577000 | 3.714310000  |
| C  | -0.146529000 | 10.396872000 | 10.607707000 | H | 3.422462000  | 11.772768000 | 2.737156000  |
| H  | 0.028477000  | 11.464297000 | 10.638497000 | C | 3.953134000  | 10.723930000 | 4.500622000  |
| C  | -0.220489000 | 9.651271000  | 11.798490000 | H | 4.946741000  | 10.502240000 | 4.131635000  |
| C  | -0.065951000 | 10.381901000 | 13.106929000 | C | 3.575201000  | 10.257442000 | 5.807211000  |
|    |              |              |              | C | 4.418778000  | 9.514087000  | 6.682121000  |

|                               |              |              |              |   |              |              |              |
|-------------------------------|--------------|--------------|--------------|---|--------------|--------------|--------------|
| C                             | 5.813689000  | 9.165022000  | 6.250631000  | H | 0.819555000  | 10.078846000 | 13.840204000 |
| H                             | 5.792725000  | 8.560720000  | 5.337726000  | H | -0.913955000 | 10.418459000 | 13.866371000 |
| H                             | 6.353170000  | 8.607356000  | 7.013296000  | C | -0.476277000 | 8.325299000  | 11.946103000 |
| H                             | 6.383347000  | 10.072530000 | 6.025233000  | C | -0.640882000 | 7.526167000  | 13.204151000 |
| C                             | 3.910784000  | 9.132822000  | 7.929553000  | H | -1.675484000 | 7.179055000  | 13.298772000 |
| C                             | 4.716737000  | 8.349660000  | 8.933721000  | H | -0.397683000 | 8.107932000  | 14.090451000 |
| H                             | 4.132033000  | 8.158266000  | 9.835535000  | H | 0.001922000  | 6.641012000  | 13.191019000 |
| H                             | 5.619976000  | 8.892767000  | 9.227666000  | C | -0.636809000 | 7.697797000  | 10.674292000 |
| H                             | 5.029533000  | 7.384223000  | 8.524566000  | C | -0.948253000 | 6.317893000  | 10.498995000 |
| C                             | 2.591439000  | 9.491311000  | 8.269159000  | H | -1.047373000 | 5.682277000  | 11.369578000 |
| H                             | 2.182485000  | 9.205712000  | 9.230208000  | C | -1.132010000 | 5.753002000  | 9.243756000  |
| C                             | 2.275258000  | 10.564656000 | 6.244205000  | H | -1.341859000 | 4.693962000  | 9.184309000  |
| C                             | 1.385382000  | 11.310660000 | 5.424809000  | C | -1.051823000 | 6.531997000  | 8.060420000  |
| C                             | -3.851965000 | 8.856390000  | 8.555241000  | C | -1.298264000 | 6.039112000  | 6.738267000  |
| C                             | -4.108943000 | 7.496801000  | 9.024304000  | C | -1.574326000 | 4.592985000  | 6.467472000  |
| C                             | -3.996022000 | 7.225818000  | 10.392746000 | H | -1.863471000 | 4.034724000  | 7.355185000  |
| C                             | -4.196294000 | 5.920507000  | 10.825226000 | H | -0.671845000 | 4.125762000  | 6.054145000  |
| C                             | -4.508846000 | 4.899093000  | 9.926435000  | H | -2.361361000 | 4.478720000  | 5.719350000  |
| C                             | -4.624676000 | 5.190948000  | 8.564632000  | C | -1.230125000 | 6.949566000  | 5.668189000  |
| C                             | -4.423201000 | 6.488663000  | 8.104595000  | C | -1.489238000 | 6.527457000  | 4.249930000  |
| O                             | -3.944556000 | 9.230890000  | 7.342418000  | H | -2.509006000 | 6.145772000  | 4.133934000  |
| O                             | -3.485173000 | 9.823955000  | 9.287012000  | H | -0.805854000 | 5.728456000  | 3.945871000  |
| Cl                            | -4.025965000 | 5.546124000  | 12.528718000 | H | -1.362877000 | 7.366715000  | 3.564289000  |
| H                             | -3.751712000 | 8.016992000  | 11.091374000 | C | -0.902426000 | 8.285800000  | 5.937149000  |
| H                             | -4.657426000 | 3.888088000  | 10.287387000 | H | -0.841616000 | 9.010139000  | 5.133153000  |
| H                             | -4.874138000 | 4.397911000  | 7.868630000  | C | -0.724257000 | 7.905596000  | 8.206210000  |
| H                             | -4.497529000 | 6.722994000  | 7.048443000  | C | -0.500165000 | 8.480235000  | 9.508234000  |
| O                             | -1.681165000 | 11.564185000 | 7.827750000  | C | -0.804712000 | 12.173051000 | 5.400391000  |
| Cl                            | 1.128533000  | 13.131718000 | 8.691911000  | H | -1.727817000 | 12.327267000 | 5.950046000  |
| C                             | -0.391188000 | 14.066061000 | 8.993663000  | C | -0.593998000 | 12.677059000 | 4.100761000  |
| H                             | -1.180755000 | 13.506660000 | 8.494070000  | C | -1.707785000 | 13.453478000 | 3.446627000  |
| H                             | -0.236392000 | 15.070226000 | 8.611443000  | H | -1.388086000 | 14.467848000 | 3.189316000  |
| Cl                            | -0.776328000 | 14.161015000 | 10.735590000 | H | -2.567188000 | 13.530443000 | 4.115274000  |
| H                             | -2.266899000 | 11.066544000 | 8.425380000  | H | -2.041296000 | 12.968522000 | 2.523948000  |
|                               |              |              |              | C | 0.633705000  | 12.437198000 | 3.471480000  |
| <sup>3</sup> TS <sub>34</sub> |              |              |              | C | 0.929296000  | 12.940204000 | 2.087055000  |
| Ni                            | -0.057932000 | 10.658884000 | 7.807631000  | H | 1.784933000  | 13.623669000 | 2.101767000  |
| N                             | -0.188639000 | 9.790282000  | 9.562213000  | H | 0.083335000  | 13.468066000 | 1.651605000  |
| N                             | -0.637720000 | 8.740684000  | 7.162930000  | H | 1.190135000  | 12.109485000 | 1.423340000  |
| N                             | 0.117025000  | 11.477319000 | 6.048584000  | C | 1.628109000  | 11.696678000 | 4.175961000  |
| N                             | 1.853272000  | 10.104811000 | 7.476173000  | C | 2.935062000  | 11.383384000 | 3.667033000  |
| C                             | -0.048229000 | 10.378899000 | 10.750187000 | H | 3.207200000  | 11.720952000 | 2.674698000  |
| H                             | 0.182109000  | 11.436265000 | 10.736572000 | C | 3.841603000  | 10.675016000 | 4.405574000  |
| C                             | -0.185091000 | 9.696158000  | 11.970519000 | H | 4.816649000  | 10.463274000 | 3.984921000  |
| C                             | -0.012700000 | 10.472350000 | 13.248759000 | C | 3.537750000  | 10.204291000 | 5.729514000  |
| H                             | 0.189529000  | 11.523747000 | 13.037416000 | C | 4.438102000  | 9.470447000  | 6.554601000  |
|                               |              |              |              | C | 5.812134000  | 9.140412000  | 6.045112000  |

|    |              |              |              |   |              |              |              |
|----|--------------|--------------|--------------|---|--------------|--------------|--------------|
| H  | 5.749690000  | 8.546058000  | 5.127630000  | H | -2.405965000 | 8.688996000  | 12.563077000 |
| H  | 6.397024000  | 8.580263000  | 6.771840000  | C | -1.034053000 | 7.092042000  | 10.602691000 |
| H  | 6.360792000  | 10.055941000 | 5.800543000  | C | -1.224681000 | 6.090407000  | 11.704785000 |
| C  | 4.005783000  | 9.081778000  | 7.827209000  | H | -2.108504000 | 5.473422000  | 11.508264000 |
| C  | 4.876654000  | 8.309022000  | 8.784223000  | H | -1.353549000 | 6.565526000  | 12.675056000 |
| H  | 4.341346000  | 8.101538000  | 9.712975000  | H | -0.365452000 | 5.415629000  | 11.766353000 |
| H  | 5.782799000  | 8.868161000  | 9.036785000  | C | -0.759293000 | 6.637062000  | 9.280634000  |
| H  | 5.188512000  | 7.352083000  | 8.354728000  | C | -0.666703000 | 5.258156000  | 8.887695000  |
| C  | 2.702127000  | 9.425509000  | 8.237934000  | H | -0.790527000 | 4.488416000  | 9.639071000  |
| H  | 2.349939000  | 9.134974000  | 9.220855000  | C | -0.441598000 | 4.893369000  | 7.590257000  |
| C  | 2.259502000  | 10.495604000 | 6.239376000  | H | -0.397220000 | 3.840577000  | 7.343906000  |
| C  | 1.318394000  | 11.236600000 | 5.467466000  | C | -0.283662000 | 5.865808000  | 6.542236000  |
| C  | -3.569065000 | 9.190716000  | 7.981685000  | C | -0.092693000 | 5.568426000  | 5.163359000  |
| C  | -3.948677000 | 7.815809000  | 8.471252000  | C | -0.045961000 | 4.157476000  | 4.658608000  |
| C  | -3.921328000 | 7.506142000  | 9.824612000  | H | 0.196852000  | 3.437443000  | 5.438367000  |
| C  | -4.164654000 | 6.184186000  | 10.217617000 | H | 0.687825000  | 4.051095000  | 3.857117000  |
| C  | -4.437137000 | 5.166960000  | 9.271479000  | H | -1.027298000 | 3.899036000  | 4.242885000  |
| C  | -4.498580000 | 5.499215000  | 7.926951000  | C | -0.009613000 | 6.635435000  | 4.257798000  |
| C  | -4.259457000 | 6.818543000  | 7.520706000  | C | 0.133096000  | 6.408400000  | 2.778105000  |
| O  | -3.598457000 | 9.420607000  | 6.766223000  | H | -0.669627000 | 5.762184000  | 2.409622000  |
| O  | -3.166475000 | 9.994849000  | 8.911839000  | H | 1.081949000  | 5.915915000  | 2.541662000  |
| Cl | -4.173575000 | 5.779686000  | 11.902895000 | H | 0.097961000  | 7.352442000  | 2.231294000  |
| H  | -3.694264000 | 8.273558000  | 10.552573000 | C | -0.105044000 | 7.954211000  | 4.736782000  |
| H  | -4.615660000 | 4.153498000  | 9.610289000  | H | -0.056053000 | 8.792008000  | 4.051351000  |
| H  | -4.730836000 | 4.736001000  | 7.193444000  | C | -0.366004000 | 7.222265000  | 6.914440000  |
| H  | -4.309620000 | 7.105695000  | 6.477442000  | C | -0.595796000 | 7.598041000  | 8.268863000  |
| O  | -1.568800000 | 11.532003000 | 8.082361000  | C | -1.068866000 | 11.656382000 | 4.635337000  |
| Cl | 1.330940000  | 13.099558000 | 8.765887000  | H | -2.094252000 | 11.545003000 | 4.966084000  |
| C  | -0.200991000 | 13.997811000 | 9.095394000  | C | -0.747220000 | 12.401472000 | 3.484313000  |
| H  | -0.991614000 | 13.384251000 | 8.658262000  | C | -1.873741000 | 13.015712000 | 2.694409000  |
| H  | -0.099693000 | 14.990617000 | 8.668065000  | H | -1.776339000 | 14.104369000 | 2.647138000  |
| Cl | -0.512229000 | 14.157312000 | 10.851288000 | H | -2.837945000 | 12.783328000 | 3.150248000  |
| H  | -2.416418000 | 10.797902000 | 8.504824000  | H | -1.887500000 | 12.639470000 | 1.666926000  |
|    |              |              |              | C | 0.599450000  | 12.553442000 | 3.126515000  |
|    |              |              |              | C | 1.016664000  | 13.349597000 | 1.923903000  |
| Ni | -0.410142000 | 10.027844000 | 6.970325000  | H | 1.618665000  | 14.212078000 | 2.229633000  |
| N  | -0.686924000 | 8.927055000  | 8.522304000  | H | 0.164390000  | 13.717017000 | 1.356177000  |
| N  | -0.274707000 | 8.236655000  | 6.021890000  | H | 1.635769000  | 12.742497000 | 1.255982000  |
| N  | -0.140770000 | 11.068306000 | 5.379456000  | C | 1.594423000  | 11.947033000 | 3.946040000  |
| N  | 1.585353000  | 9.936954000  | 7.008545000  | C | 3.012870000  | 12.050450000 | 3.735720000  |
| C  | -0.959906000 | 9.355029000  | 9.747044000  | H | 3.377538000  | 12.610990000 | 2.884055000  |
| H  | -1.050070000 | 10.428058000 | 9.863248000  | C | 3.910489000  | 11.470722000 | 4.588397000  |
| C  | -1.139417000 | 8.470674000  | 10.828421000 | H | 4.970496000  | 11.582917000 | 4.397701000  |
| C  | -1.447589000 | 9.054794000  | 12.182526000 | C | 3.487127000  | 10.721987000 | 5.740437000  |
| H  | -1.499591000 | 10.143760000 | 12.130175000 | C | 4.361483000  | 10.113870000 | 6.686307000  |
| H  | -0.677762000 | 8.788798000  | 12.913324000 | C | 5.847249000  | 10.223725000 | 6.498655000  |
|    |              |              |              | H | 6.142955000  | 9.816533000  | 5.526440000  |

|    |              |              |              |   |              |              |              |
|----|--------------|--------------|--------------|---|--------------|--------------|--------------|
| H  | 6.400382000  | 9.693635000  | 7.271103000  | C | -0.439211000 | 8.324230000  | 11.820623000 |
| H  | 6.157316000  | 11.273953000 | 6.518367000  | C | -0.613321000 | 7.494300000  | 13.058227000 |
| C  | 3.799680000  | 9.436459000  | 7.775589000  | H | -1.624846000 | 7.075935000  | 13.093100000 |
| C  | 4.632254000  | 8.772244000  | 8.841461000  | H | -0.450554000 | 8.070590000  | 13.966365000 |
| H  | 3.995886000  | 8.306794000  | 9.596540000  | H | 0.086355000  | 6.652440000  | 13.057816000 |
| H  | 5.278885000  | 9.496398000  | 9.346019000  | C | -0.587144000 | 7.716537000  | 10.540499000 |
| H  | 5.273724000  | 7.994759000  | 8.415799000  | C | -0.894506000 | 6.328113000  | 10.336794000 |
| C  | 2.396512000  | 9.375412000  | 7.892971000  | H | -1.006335000 | 5.685099000  | 11.200236000 |
| H  | 1.936835000  | 8.864830000  | 8.730467000  | C | -1.068329000 | 5.806285000  | 9.087232000  |
| C  | 2.102425000  | 10.601460000 | 5.948562000  | H | -1.316412000 | 4.758165000  | 8.981115000  |
| C  | 1.169434000  | 11.209088000 | 5.063063000  | C | -0.967961000 | 6.622498000  | 7.911321000  |
| C  | -3.198218000 | 6.611518000  | 4.073460000  | C | -1.204879000 | 6.157574000  | 6.584971000  |
| C  | -3.460294000 | 7.132837000  | 5.441814000  | C | -1.561379000 | 4.716729000  | 6.359919000  |
| C  | -3.572075000 | 8.506068000  | 5.685822000  | H | -2.486829000 | 4.469268000  | 6.890047000  |
| C  | -3.813339000 | 8.935831000  | 6.989050000  | H | -0.777266000 | 4.059607000  | 6.749308000  |
| C  | -3.935699000 | 8.034498000  | 8.050402000  | H | -1.703168000 | 4.488235000  | 5.305743000  |
| C  | -3.820844000 | 6.669601000  | 7.790183000  | C | -1.117445000 | 7.072947000  | 5.532147000  |
| C  | -3.583212000 | 6.216653000  | 6.493069000  | C | -1.384166000 | 6.696746000  | 4.098455000  |
| O  | -3.081256000 | 5.430715000  | 3.798937000  | H | -2.403804000 | 6.319100000  | 3.975054000  |
| O  | -3.088473000 | 7.589830000  | 3.153298000  | H | -0.697859000 | 5.916464000  | 3.755896000  |
| Cl | -3.943228000 | 10.647940000 | 7.300217000  | H | -1.265914000 | 7.561284000  | 3.442393000  |
| H  | -3.475019000 | 9.218286000  | 4.877571000  | C | -0.777426000 | 8.411214000  | 5.821061000  |
| H  | -4.112703000 | 8.398426000  | 9.055567000  | H | -0.700042000 | 9.140696000  | 5.022830000  |
| H  | -3.910360000 | 5.960420000  | 8.605046000  | C | -0.644601000 | 7.981130000  | 8.089307000  |
| H  | -3.486470000 | 5.159034000  | 6.279860000  | C | -0.444049000 | 8.522127000  | 9.394634000  |
| O  | -1.418349000 | 11.206747000 | 7.596428000  | C | -0.766606000 | 12.194363000 | 5.348460000  |
| H  | -2.945459000 | 7.166369000  | 2.289860000  | H | -1.719089000 | 12.340824000 | 5.846680000  |
| Cl | 1.410599000  | 13.897828000 | 7.111171000  | C | -0.542442000 | 12.693611000 | 4.051417000  |
| C  | 0.475468000  | 13.381104000 | 8.550551000  | C | -1.662260000 | 13.436477000 | 3.370154000  |
| H  | -0.388213000 | 12.810381000 | 8.202256000  | H | -1.364305000 | 14.459726000 | 3.122937000  |
| H  | 0.194884000  | 14.269294000 | 9.109440000  | H | -2.541992000 | 13.487922000 | 4.014127000  |
| Cl | 1.426728000  | 12.316132000 | 9.638050000  | H | -1.954142000 | 12.941302000 | 2.439256000  |
|    |              |              |              | C | 0.703953000  | 12.479930000 | 3.446247000  |
|    |              |              |              | C | 1.011918000  | 12.981021000 | 2.065645000  |
|    |              |              |              | H | 1.879524000  | 13.648506000 | 2.085907000  |
| Ni | 0.014404000  | 10.709531000 | 7.761601000  | H | 0.176873000  | 13.523434000 | 1.627798000  |
| N  | -0.133736000 | 9.842526000  | 9.488037000  | H | 1.261150000  | 12.145268000 | 1.403403000  |
| N  | -0.546570000 | 8.841149000  | 7.050081000  | C | 1.699732000  | 11.762594000 | 4.171079000  |
| N  | 0.163004000  | 11.525800000 | 6.023029000  | C | 3.018763000  | 11.461146000 | 3.685734000  |
| N  | 1.885337000  | 10.187628000 | 7.475462000  | H | 3.302400000  | 11.796746000 | 2.696206000  |
| C  | -0.000024000 | 10.410938000 | 10.683489000 | C | 3.919586000  | 10.763112000 | 4.440872000  |
| H  | 0.235994000  | 11.466739000 | 10.699168000 | H | 4.902607000  | 10.557963000 | 4.036126000  |
| C  | -0.148221000 | 9.692796000  | 11.882908000 | C | 3.598674000  | 10.291654000 | 5.761010000  |
| C  | 0.017202000  | 10.436959000 | 13.182424000 | C | 4.483426000  | 9.559126000  | 6.604331000  |
| H  | 0.227868000  | 11.492419000 | 13.000614000 | C | 5.866156000  | 9.230864000  | 6.121946000  |
| H  | 0.841339000  | 10.024248000 | 13.771913000 | H | 5.819147000  | 8.616331000  | 5.216781000  |
| H  | -0.890041000 | 10.374143000 | 13.790441000 | H | 6.445593000  | 8.691337000  | 6.867998000  |



|                    |              |              |              |                                  |              |              |              |
|--------------------|--------------|--------------|--------------|----------------------------------|--------------|--------------|--------------|
| H                  | 6.409175000  | 10.145996000 | 5.864527000  | O                                | -2.015352000 | 9.490691000  | 7.886498000  |
| C                  | 4.025090000  | 9.165661000  | 7.867671000  | C                                | -6.844987000 | 12.190768000 | 9.812354000  |
| C                  | 4.877275000  | 8.389399000  | 8.837963000  | C                                | -8.170528000 | 11.593382000 | 10.305129000 |
| H                  | 4.324868000  | 8.176083000  | 9.754912000  | C                                | -9.007155000 | 11.049693000 | 9.138563000  |
| H                  | 5.777141000  | 8.949497000  | 9.109526000  | C                                | -8.211477000 | 10.032419000 | 8.309635000  |
| H                  | 5.197501000  | 7.435825000  | 8.407620000  | C                                | -6.884604000 | 10.626770000 | 7.819113000  |
| C                  | 2.713991000  | 9.503642000  | 8.257219000  | C                                | -6.050704000 | 11.169903000 | 8.986844000  |
| H                  | 2.340996000  | 9.208022000  | 9.229552000  | H                                | -6.247007000 | 12.541494000 | 10.661777000 |
| C                  | 2.312321000  | 10.579581000 | 6.245008000  | H                                | -7.055853000 | 13.072486000 | 9.190614000  |
| C                  | 1.379296000  | 11.305670000 | 5.459840000  | H                                | -7.954107000 | 10.772602000 | 11.003653000 |
| C                  | -3.735010000 | 8.735721000  | 8.008153000  | H                                | -8.740939000 | 12.342393000 | 10.866966000 |
| C                  | -4.134095000 | 7.460998000  | 8.664687000  | H                                | -9.932274000 | 10.595817000 | 9.513172000  |
| C                  | -4.053656000 | 7.311157000  | 10.053778000 | H                                | -9.306685000 | 11.886493000 | 8.491645000  |
| C                  | -4.351570000 | 6.072096000  | 10.610352000 | H                                | -8.003298000 | 9.151119000  | 8.930776000  |
| C                  | -4.732698000 | 4.987516000  | 9.822437000  | H                                | -8.807995000 | 9.681238000  | 7.459262000  |
| C                  | -4.820712000 | 5.155708000  | 8.437760000  | H                                | -6.316381000 | 9.877267000  | 7.259812000  |
| C                  | -4.520368000 | 6.385041000  | 7.857404000  | H                                | -7.097214000 | 11.447381000 | 7.119167000  |
| O                  | -3.699103000 | 8.892265000  | 6.798018000  | H                                | -5.761492000 | 10.335200000 | 9.638754000  |
| O                  | -3.375211000 | 9.684923000  | 8.884450000  | H                                | -5.118958000 | 11.613437000 | 8.616150000  |
| Cl                 | -4.205908000 | 5.862859000  | 12.350801000 |                                  |              |              |              |
| H                  | -3.744237000 | 8.138681000  | 10.677967000 | <sup>2</sup> TS <sub>3'+CH</sub> |              |              |              |
| H                  | -4.954012000 | 4.030969000  | 10.281242000 | C                                | -3.625222000 | 9.759149000  | 7.319548000  |
| H                  | -5.122602000 | 4.318606000  | 7.817327000  | C                                | -4.286595000 | 8.425567000  | 7.411127000  |
| H                  | -4.567158000 | 6.526319000  | 6.784083000  | C                                | -4.595988000 | 7.860297000  | 8.653440000  |
| O                  | -1.561105000 | 11.465569000 | 8.045849000  | C                                | -5.205425000 | 6.611261000  | 8.687817000  |
| Cl                 | 1.264910000  | 13.121534000 | 8.707570000  | C                                | -5.517642000 | 5.918193000  | 7.518592000  |
| C                  | -0.205465000 | 14.127008000 | 9.023321000  | C                                | -5.193090000 | 6.489370000  | 6.286842000  |
| H                  | -1.020431000 | 13.652213000 | 8.484025000  | C                                | -4.569329000 | 7.733152000  | 6.228775000  |
| H                  | 0.014830000  | 15.135082000 | 8.686000000  | O                                | -2.828080000 | 10.041968000 | 6.427500000  |
| Cl                 | -0.623942000 | 14.167880000 | 10.756389000 | Cl                               | -5.598362000 | 5.894355000  | 10.246290000 |
| H                  | -2.935279000 | 10.420365000 | 8.392620000  | H                                | -4.357746000 | 8.381554000  | 9.571609000  |
| <sup>3</sup> 3'+CH |              |              |              | H                                | -6.001510000 | 4.950107000  | 7.572468000  |
| C                  | -2.745287000 | 8.905938000  | 7.031672000  | H                                | -5.431164000 | 5.956116000  | 5.372890000  |
| C                  | -3.984927000 | 8.184501000  | 7.342220000  | H                                | -4.309386000 | 8.183102000  | 5.277587000  |
| C                  | -4.388906000 | 8.076690000  | 8.677594000  | O                                | -3.878485000 | 10.665691000 | 8.243238000  |
| C                  | -5.579532000 | 7.418102000  | 8.955691000  | C                                | -6.464678000 | 12.097744000 | 9.591313000  |
| C                  | -6.360566000 | 6.867383000  | 7.938225000  | C                                | -7.922678000 | 12.350651000 | 10.043037000 |
| C                  | -5.938448000 | 6.979533000  | 6.612256000  | C                                | -8.919855000 | 11.844316000 | 8.995633000  |
| C                  | -4.751071000 | 7.638633000  | 6.306244000  | C                                | -8.692644000 | 10.362912000 | 8.676746000  |
| O                  | -2.257577000 | 9.037016000  | 5.869440000  | C                                | -7.236793000 | 10.104586000 | 8.219169000  |
| Cl                 | -6.125563000 | 7.299341000  | 10.619669000 | C                                | -6.278364000 | 10.627189000 | 9.271212000  |
| H                  | -3.788415000 | 8.506873000  | 9.469960000  | H                                | -5.764138000 | 12.420984000 | 10.367375000 |
| H                  | -7.287787000 | 6.362539000  | 8.181867000  | H                                | -6.261338000 | 12.694852000 | 8.693622000  |
| H                  | -6.545574000 | 6.554197000  | 5.821253000  | H                                | -8.098022000 | 11.835021000 | 10.996009000 |
| H                  | -4.418307000 | 7.738801000  | 5.279218000  | H                                | -8.060793000 | 13.421617000 | 10.228549000 |
|                    |              |              |              | H                                | -9.945825000 | 11.997794000 | 9.350178000  |

|                               |              |              |              |                           |              |              |              |
|-------------------------------|--------------|--------------|--------------|---------------------------|--------------|--------------|--------------|
| H                             | -8.810888000 | 12.434185000 | 8.075596000  | C                         | -6.132604000 | -1.302610000 | -1.431178000 |
| H                             | -8.898383000 | 9.759401000  | 9.570211000  | C                         | -6.923873000 | -1.089053000 | -0.301547000 |
| H                             | -9.379771000 | 10.021068000 | 7.894849000  | C                         | -6.348626000 | -0.656475000 | 0.889400000  |
| H                             | -7.082616000 | 9.037388000  | 8.039717000  | O                         | -5.063888000 | 0.263537000  | 3.250519000  |
| H                             | -7.062847000 | 10.627903000 | 7.270490000  | O                         | -3.061040000 | 0.219525000  | 2.156463000  |
| H                             | -6.260973000 | 9.999669000  | 10.170498000 | Cl                        | -3.756127000 | -1.341452000 | -2.768329000 |
| H                             | -5.160337000 | 10.532938000 | 8.843268000  | H                         | -3.091737000 | -0.476307000 | -0.126825000 |
| $^3\text{IM}_{3^++\text{CH}}$ |              |              |              | H                         | -6.572600000 | -1.638062000 | -2.362951000 |
| C                             | -3.624763000 | 9.854540000  | 7.202662000  | H                         | -7.993062000 | -1.261431000 | -0.357994000 |
| C                             | -4.280019000 | 8.518560000  | 7.356405000  | H                         | -6.950555000 | -0.483776000 | 1.773279000  |
| C                             | -4.470564000 | 7.945227000  | 8.619269000  | O                         | -2.489182000 | 0.680967000  | 3.391711000  |
| C                             | -5.099027000 | 6.707500000  | 8.706973000  | H                         | -2.621008000 | 1.667189000  | 3.298144000  |
| C                             | -5.544708000 | 6.032794000  | 7.571618000  | C                         | -3.011985000 | 3.468311000  | 1.363667000  |
| C                             | -5.334775000 | 6.609539000  | 6.317515000  | C                         | -3.692514000 | 4.749301000  | 0.810046000  |
| C                             | -4.694515000 | 7.840757000  | 6.205207000  | C                         | -5.099572000 | 4.915832000  | 1.396498000  |
| O                             | -2.938531000 | 10.147202000 | 6.243915000  | C                         | -5.073910000 | 4.942892000  | 2.929846000  |
| Cl                            | -5.343587000 | 5.985577000  | 10.292654000 | C                         | -4.396934000 | 3.665078000  | 3.495399000  |
| H                             | -4.125751000 | 8.441760000  | 9.517679000  | C                         | -3.050975000 | 3.485478000  | 2.862281000  |
| H                             | -6.040466000 | 5.074054000  | 7.667354000  | H                         | -1.987283000 | 3.383795000  | 0.989888000  |
| H                             | -5.675235000 | 6.090001000  | 5.428448000  | H                         | -3.570164000 | 2.603930000  | 0.978020000  |
| H                             | -4.523405000 | 8.295158000  | 5.236423000  | H                         | -3.080723000 | 5.621842000  | 1.071851000  |
| O                             | -3.824526000 | 10.744764000 | 8.194188000  | H                         | -3.730446000 | 4.698518000  | -0.283973000 |
| C                             | -6.502215000 | 11.911052000 | 9.770127000  | H                         | -5.558475000 | 5.834415000  | 1.013031000  |
| C                             | -7.978083000 | 12.348494000 | 9.974335000  | H                         | -5.731663000 | 4.082151000  | 1.060440000  |
| C                             | -8.854478000 | 11.879881000 | 8.806384000  | H                         | -4.517208000 | 5.825140000  | 3.270706000  |
| C                             | -8.760405000 | 10.363112000 | 8.600821000  | H                         | -6.089165000 | 5.027164000  | 3.333720000  |
| C                             | -7.287489000 | 9.918815000  | 8.394769000  | H                         | -4.321259000 | 3.722961000  | 4.585443000  |
| C                             | -6.443385000 | 10.434862000 | 9.519754000  | H                         | -5.041087000 | 2.807887000  | 3.259148000  |
| H                             | -5.894415000 | 12.198555000 | 10.633279000 | H                         | -2.181417000 | 3.880771000  | 3.387500000  |
| H                             | -6.110300000 | 12.453216000 | 8.897028000  | $^2\text{TS}_{\text{OH}}$ |              |              |              |
| H                             | -8.352489000 | 11.914954000 | 10.910310000 | C                         | -4.860340000 | 0.319791000  | 1.673171000  |
| H                             | -8.024498000 | 13.438010000 | 10.082526000 | C                         | -5.135604000 | -0.616968000 | 0.548109000  |
| H                             | -9.896926000 | 12.170257000 | 8.980729000  | C                         | -4.136724000 | -1.423253000 | -0.014306000 |
| H                             | -8.534085000 | 12.389760000 | 7.887346000  | C                         | -4.476990000 | -2.269792000 | -1.063262000 |
| H                             | -9.167276000 | 9.848837000  | 9.480760000  | C                         | -5.777851000 | -2.334189000 | -1.562001000 |
| H                             | -9.360394000 | 10.049658000 | 7.738980000  | C                         | -6.761674000 | -1.525893000 | -0.990685000 |
| H                             | -7.222392000 | 8.831070000  | 8.308604000  | C                         | -6.446723000 | -0.669334000 | 0.059886000  |
| H                             | -6.939399000 | 10.342436000 | 7.441151000  | O                         | -5.689053000 | 1.014692000  | 2.216689000  |
| H                             | -6.259143000 | 9.775508000  | 10.366745000 | O                         | -3.530158000 | 0.300676000  | 1.994973000  |
| H                             | -4.591722000 | 10.484192000 | 8.761235000  | Cl                        | -3.231509000 | -3.286933000 | -1.778531000 |
| $^2\text{IM}'$                |              |              |              | H                         | -3.121527000 | -1.390756000 | 0.357675000  |
| C                             | -4.414725000 | 0.039136000  | 2.254962000  | H                         | -6.014333000 | -3.003904000 | -2.380482000 |
| C                             | -4.967720000 | -0.436008000 | 0.956482000  | H                         | -7.776081000 | -1.569400000 | -1.371762000 |
| C                             | -4.159261000 | -0.645925000 | -0.168972000 | H                         | -7.200380000 | -0.036392000 | 0.512459000  |
| C                             | -4.758902000 | -1.076653000 | -1.347116000 | O                         | -3.239404000 | 1.118679000  | 3.131836000  |

|                               |              |             |             |                               |              |              |              |
|-------------------------------|--------------|-------------|-------------|-------------------------------|--------------|--------------|--------------|
| H                             | -3.001244000 | 2.069005000 | 2.712435000 | H                             | -4.577566000 | 6.038532000  | 4.506361000  |
| C                             | -3.587527000 | 3.681464000 | 1.231654000 | H                             | -5.617071000 | 5.621512000  | 3.146670000  |
| C                             | -3.902412000 | 5.193566000 | 1.097627000 | H                             | -3.384361000 | 3.875382000  | 4.311090000  |
| C                             | -4.906372000 | 5.640980000 | 2.166882000 | H                             | -5.111144000 | 3.578642000  | 4.464276000  |
| C                             | -4.413251000 | 5.306791000 | 3.580282000 | H                             | -4.090107000 | 2.157765000  | 2.659548000  |
| C                             | -4.090389000 | 3.798915000 | 3.715297000 | H                             | -5.313816000 | 3.251693000  | 2.008137000  |
| C                             | -3.118400000 | 3.396695000 | 2.637554000 | H                             | -2.286637000 | 3.691491000  | 1.943726000  |
| H                             | -2.841630000 | 3.379568000 | 0.489837000 |                               |              |              |              |
| H                             | -4.508312000 | 3.120701000 | 1.031209000 |                               |              |              |              |
| H                             | -2.971779000 | 5.765391000 | 1.204165000 |                               |              |              |              |
| H                             | -4.289205000 | 5.394361000 | 0.092088000 |                               |              |              |              |
| H                             | -5.091818000 | 6.717676000 | 2.078815000 |                               |              |              |              |
| H                             | -5.867387000 | 5.138778000 | 1.991290000 |                               |              |              |              |
| H                             | -3.510099000 | 5.890785000 | 3.800118000 |                               |              |              |              |
| H                             | -5.163671000 | 5.586259000 | 4.328348000 |                               |              |              |              |
| H                             | -3.690464000 | 3.583330000 | 4.711254000 |                               |              |              |              |
| H                             | -5.012629000 | 3.219845000 | 3.593473000 |                               |              |              |              |
| H                             | -2.074753000 | 3.666934000 | 2.833462000 |                               |              |              |              |
|                               |              |             |             |                               |              |              |              |
| <sup>3</sup> PC <sub>OH</sub> |              |             |             | <sup>3</sup> IM''             |              |              |              |
|                               |              |             |             | C                             | -4.414725000 | 0.039136000  | 2.254962000  |
|                               |              |             |             | C                             | -4.967720000 | -0.436008000 | 0.956482000  |
|                               |              |             |             | C                             | -4.159261000 | -0.645925000 | -0.168972000 |
|                               |              |             |             | C                             | -4.758902000 | -1.076653000 | -1.347116000 |
|                               |              |             |             | C                             | -6.132604000 | -1.302610000 | -1.431178000 |
|                               |              |             |             | C                             | -6.923873000 | -1.089053000 | -0.301547000 |
|                               |              |             |             | C                             | -6.348626000 | -0.656475000 | 0.889400000  |
|                               |              |             |             | O                             | -5.063888000 | 0.263537000  | 3.250519000  |
|                               |              |             |             | O                             | -3.061040000 | 0.219525000  | 2.156463000  |
|                               |              |             |             | Cl                            | -3.756127000 | -1.341452000 | -2.768329000 |
|                               |              |             |             | H                             | -3.091737000 | -0.476307000 | -0.126825000 |
|                               |              |             |             | H                             | -6.572600000 | -1.638062000 | -2.362951000 |
|                               |              |             |             | H                             | -7.993062000 | -1.261431000 | -0.357994000 |
|                               |              |             |             | H                             | -6.950555000 | -0.483776000 | 1.773279000  |
|                               |              |             |             | O                             | -2.489182000 | 0.680967000  | 3.391711000  |
|                               |              |             |             | H                             | -2.621008000 | 1.667189000  | 3.298144000  |
|                               |              |             |             | C                             | -3.011985000 | 3.468311000  | 1.363667000  |
|                               |              |             |             | C                             | -3.692514000 | 4.749301000  | 0.810046000  |
|                               |              |             |             | C                             | -5.099572000 | 4.915832000  | 1.396498000  |
|                               |              |             |             | C                             | -5.073910000 | 4.942892000  | 2.929846000  |
|                               |              |             |             | C                             | -4.396934000 | 3.665078000  | 3.495399000  |
|                               |              |             |             | C                             | -3.050975000 | 3.485478000  | 2.862281000  |
|                               |              |             |             | H                             | -1.987283000 | 3.383795000  | 0.989888000  |
|                               |              |             |             | H                             | -3.570164000 | 2.603930000  | 0.978020000  |
|                               |              |             |             | H                             | -3.080723000 | 5.621842000  | 1.071851000  |
|                               |              |             |             | H                             | -3.730446000 | 4.698518000  | -0.283973000 |
|                               |              |             |             | H                             | -5.558475000 | 5.834415000  | 1.013031000  |
|                               |              |             |             | H                             | -5.731663000 | 4.082151000  | 1.060440000  |
|                               |              |             |             | H                             | -4.517208000 | 5.825140000  | 3.270706000  |
|                               |              |             |             | H                             | -6.089165000 | 5.027164000  | 3.333720000  |
|                               |              |             |             | H                             | -4.321259000 | 3.722961000  | 4.585443000  |
|                               |              |             |             | H                             | -5.041087000 | 2.807887000  | 3.259148000  |
|                               |              |             |             | H                             | -2.181417000 | 3.880771000  | 3.387500000  |
|                               |              |             |             |                               |              |              |              |
|                               |              |             |             | <sup>2</sup> TS <sub>Cl</sub> |              |              |              |
|                               |              |             |             | C                             | -4.860340000 | 0.319791000  | 1.673171000  |
|                               |              |             |             | C                             | -5.135604000 | -0.616968000 | 0.548109000  |

|                    |              |              |              |                    |              |              |              |
|--------------------|--------------|--------------|--------------|--------------------|--------------|--------------|--------------|
| C                  | -4.136724000 | -1.423253000 | -0.014306000 | H                  | -6.935534000 | -0.083991000 | -0.819764000 |
| C                  | -4.476990000 | -2.269792000 | -1.063262000 | O                  | -3.247199000 | 3.131884000  | 0.255918000  |
| C                  | -5.777851000 | -2.334189000 | -1.562001000 | H                  | -4.171558000 | 2.865353000  | -0.038340000 |
| C                  | -6.761674000 | -1.525893000 | -0.990685000 | C                  | -3.561580000 | 5.293182000  | 1.255934000  |
| C                  | -6.446723000 | -0.669334000 | 0.059886000  | C                  | -3.583365000 | 6.074949000  | 2.577981000  |
| O                  | -5.689053000 | 1.014692000  | 2.216689000  | C                  | -4.607102000 | 5.490915000  | 3.558064000  |
| O                  | -3.530158000 | 0.300676000  | 1.994973000  | C                  | -4.348635000 | 3.998389000  | 3.799825000  |
| Cl                 | -3.231509000 | -3.286933000 | -1.778531000 | C                  | -4.325382000 | 3.210994000  | 2.482710000  |
| H                  | -3.121527000 | -1.390756000 | 0.357675000  | C                  | -3.292041000 | 3.798441000  | 1.521285000  |
| H                  | -6.014333000 | -3.003904000 | -2.380482000 | H                  | -2.798047000 | 5.684514000  | 0.577357000  |
| H                  | -7.776081000 | -1.569400000 | -1.371762000 | H                  | -4.531837000 | 5.385753000  | 0.751746000  |
| H                  | -7.200380000 | -0.036392000 | 0.512459000  | H                  | -2.584180000 | 6.044111000  | 3.032005000  |
| O                  | -3.239404000 | 1.118679000  | 3.131836000  | H                  | -3.803624000 | 7.127562000  | 2.369744000  |
| H                  | -3.001244000 | 2.069005000  | 2.712435000  | H                  | -4.577566000 | 6.038532000  | 4.506361000  |
| C                  | -3.587527000 | 3.681464000  | 1.231654000  | H                  | -5.617071000 | 5.621512000  | 3.146670000  |
| C                  | -3.902412000 | 5.193566000  | 1.097627000  | H                  | -3.384361000 | 3.875382000  | 4.311090000  |
| C                  | -4.906372000 | 5.640980000  | 2.166882000  | H                  | -5.111144000 | 3.578642000  | 4.464276000  |
| C                  | -4.413251000 | 5.306791000  | 3.580282000  | H                  | -4.090107000 | 2.157765000  | 2.659548000  |
| C                  | -4.090389000 | 3.798915000  | 3.715297000  | H                  | -5.313816000 | 3.251693000  | 2.008137000  |
| C                  | -3.118400000 | 3.396695000  | 2.637554000  | H                  | -2.286637000 | 3.691491000  | 1.943726000  |
| H                  | -2.841630000 | 3.379568000  | 0.489837000  |                    |              |              |              |
| H                  | -4.508312000 | 3.120701000  | 1.031209000  |                    |              |              |              |
| H                  | -2.971779000 | 5.765391000  | 1.204165000  |                    |              |              |              |
| H                  | -4.289205000 | 5.394361000  | 0.092088000  | <sup>12</sup> C+CH |              |              |              |
| H                  | -5.091818000 | 6.717676000  | 2.078815000  | Ni                 | 0.051461000  | 8.897042000  | 7.164197000  |
| H                  | -5.867387000 | 5.138778000  | 1.991290000  | N                  | 0.099347000  | 8.356315000  | 9.023827000  |
| H                  | -3.510099000 | 5.890785000  | 3.800118000  | N                  | -0.903771000 | 7.216103000  | 6.908625000  |
| H                  | -5.163671000 | 5.586259000  | 4.328348000  | N                  | -0.422491000 | 9.794077000  | 5.512868000  |
| H                  | -3.690464000 | 3.583330000  | 4.711254000  | N                  | 1.534000000  | 10.151171000 | 7.188456000  |
| H                  | -5.012629000 | 3.219845000  | 3.593473000  | C                  | 0.469406000  | 9.060332000  | 10.091242000 |
| H                  | -2.074753000 | 3.666934000  | 2.833462000  | H                  | 0.894423000  | 10.037637000 | 9.909519000  |
|                    |              |              |              | C                  | 0.319071000  | 8.603471000  | 11.415172000 |
| <sup>238</sup> PCl |              |              |              | C                  | 0.781986000  | 9.501515000  | 12.533264000 |
|                    |              |              |              | H                  | 1.199036000  | 10.429050000 | 12.137341000 |
|                    |              |              |              | H                  | 1.553212000  | 9.015484000  | 13.138337000 |
| C                  | -4.556418000 | 0.757593000  | 0.046682000  | H                  | -0.045795000 | 9.764184000  | 13.198799000 |
| C                  | -5.034564000 | -0.663269000 | -0.013446000 | C                  | -0.242763000 | 7.342309000  | 11.638195000 |
| C                  | -4.213245000 | -1.715199000 | 0.408471000  | C                  | -0.421130000 | 6.777832000  | 13.017348000 |
| C                  | -4.702830000 | -3.014114000 | 0.334096000  | H                  | -1.479125000 | 6.568981000  | 13.207092000 |
| C                  | -5.982976000 | -3.287443000 | -0.147117000 | H                  | -0.063157000 | 7.456211000  | 13.789061000 |
| C                  | -6.789050000 | -2.226870000 | -0.563563000 | H                  | 0.119781000  | 5.830935000  | 13.117636000 |
| C                  | -6.321333000 | -0.916610000 | -0.499555000 | C                  | -0.678772000 | 6.593447000  | 10.507427000 |
| O                  | -5.279543000 | 1.695175000  | -0.344164000 | C                  | -1.299001000 | 5.299681000  | 10.575500000 |
| O                  | -3.366042000 | 0.916719000  | 0.532380000  | H                  | -1.427162000 | 4.829576000  | 11.541921000 |
| Cl                 | -3.679548000 | -4.346701000 | 0.861099000  | C                  | -1.744015000 | 4.658536000  | 9.454163000  |
| H                  | -3.217281000 | -1.518484000 | 0.784238000  | H                  | -2.210195000 | 3.686312000  | 9.549169000  |
| H                  | -6.340027000 | -4.309523000 | -0.194496000 | C                  | -1.632382000 | 5.253143000  | 8.151662000  |
| H                  | -7.786046000 | -2.430279000 | -0.939334000 | C                  | -2.109483000 | 4.659151000  | 6.948941000  |

|   |              |              |             |                   |              |              |              |
|---|--------------|--------------|-------------|-------------------|--------------|--------------|--------------|
| C | -2.785371000 | 3.320140000  | 6.997482000 | C                 | -4.073733000 | 7.261449000  | 10.066100000 |
| H | -3.654967000 | 3.359039000  | 7.660881000 | C                 | -4.601053000 | 6.157280000  | 10.725254000 |
| H | -2.105283000 | 2.560146000  | 7.396248000 | C                 | -5.316604000 | 5.171474000  | 10.046365000 |
| H | -3.121751000 | 2.992388000  | 6.016045000 | C                 | -5.510636000 | 5.301383000  | 8.669310000  |
| C | -1.924167000 | 5.357796000  | 5.752043000 | C                 | -4.989605000 | 6.395091000  | 7.984026000  |
| C | -2.373726000 | 4.821163000  | 4.417654000 | O                 | -3.830805000 | 8.655981000  | 6.699645000  |
| H | -3.456083000 | 4.659993000  | 4.402988000 | O                 | -2.941853000 | 9.292799000  | 8.695601000  |
| H | -1.893707000 | 3.864847000  | 4.190071000 | Cl                | -4.328650000 | 5.988975000  | 12.451001000 |
| H | -2.129359000 | 5.520052000  | 3.615337000 | H                 | -3.513382000 | 8.007654000  | 10.613306000 |
| C | -1.310620000 | 6.625622000  | 5.787595000 | H                 | -5.711985000 | 4.318098000  | 10.584590000 |
| H | -1.154884000 | 7.167120000  | 4.864473000 | H                 | -6.070259000 | 4.541557000  | 8.134873000  |
| C | -1.026066000 | 6.519041000  | 8.072576000 | H                 | -5.121572000 | 6.502181000  | 6.914243000  |
| C | -0.513851000 | 7.159976000  | 9.231581000 | O                 | -2.296137000 | 10.314906000 | 7.905153000  |
| C | -1.524051000 | 9.668740000  | 4.776974000 | H                 | -1.999064000 | 10.886198000 | 8.641718000  |
| H | -2.250936000 | 8.939315000  | 5.104851000 | Cl                | 1.013268000  | 12.868554000 | 9.404150000  |
| C | -1.790020000 | 10.459630000 | 3.641730000 | C                 | -0.470465000 | 13.306629000 | 10.301618000 |
| C | -3.058612000 | 10.189778000 | 2.873907000 | H                 | -1.074615000 | 13.953823000 | 9.672803000  |
| H | -3.669666000 | 11.092172000 | 2.781313000 | H                 | -0.183455000 | 13.782869000 | 11.234132000 |
| H | -3.657869000 | 9.428051000  | 3.376194000 | Cl                | -1.467564000 | 11.864952000 | 10.719809000 |
| H | -2.840149000 | 9.834593000  | 1.861731000 | C                 | -1.795075000 | 13.440379000 | 6.670885000  |
| C | -0.875239000 | 11.450572000 | 3.271828000 | C                 | -1.971898000 | 14.249026000 | 5.378367000  |
| C | -1.080601000 | 12.313522000 | 2.061044000 | C                 | -3.241764000 | 13.827363000 | 4.627273000  |
| H | -1.255900000 | 13.353456000 | 2.357272000 | C                 | -4.485200000 | 13.925061000 | 5.521255000  |
| H | -1.930689000 | 11.986809000 | 1.465348000 | C                 | -4.301940000 | 13.125060000 | 6.818432000  |
| H | -0.191824000 | 12.302581000 | 1.423170000 | C                 | -3.036324000 | 13.565413000 | 7.566368000  |
| C | 0.259744000  | 11.657339000 | 4.107037000 | H                 | -0.891530000 | 13.766571000 | 7.198953000  |
| C | 1.244537000  | 12.685549000 | 3.909746000 | H                 | -1.645510000 | 12.381992000 | 6.417701000  |
| H | 1.144524000  | 13.351146000 | 3.061503000 | H                 | -2.040112000 | 15.315851000 | 5.631641000  |
| C | 2.298286000  | 12.844433000 | 4.765324000 | H                 | -1.089049000 | 14.138489000 | 4.739247000  |
| H | 3.020797000  | 13.628646000 | 4.576870000 | H                 | -3.371137000 | 14.434933000 | 3.724166000  |
| C | 2.474896000  | 11.993976000 | 5.910362000 | H                 | -3.129100000 | 12.787750000 | 4.296205000  |
| C | 3.558427000  | 12.086468000 | 6.829705000 | H                 | -4.667726000 | 14.979236000 | 5.771782000  |
| C | 4.599602000  | 13.153358000 | 6.652382000 | H                 | -5.369787000 | 13.572671000 | 4.978330000  |
| H | 5.132325000  | 13.014995000 | 5.705256000 | H                 | -5.181676000 | 13.236848000 | 7.462503000  |
| H | 5.333295000  | 13.149542000 | 7.455876000 | H                 | -4.215181000 | 12.055918000 | 6.581600000  |
| H | 4.133477000  | 14.142989000 | 6.620389000 | H                 | -3.146912000 | 14.611365000 | 7.885007000  |
| C | 3.623892000  | 11.149168000 | 7.866902000 | H                 | -2.924692000 | 12.971818000 | 8.480146000  |
| C | 4.748142000  | 11.120152000 | 8.869989000 |                   |              |              |              |
| H | 4.620307000  | 10.294258000 | 9.572467000 | <sup>3</sup> 2+CH |              |              |              |
| H | 4.784936000  | 12.048522000 | 9.448357000 | Ni                | -0.700710000 | 9.912190000  | 8.223171000  |
| H | 5.717243000  | 10.997741000 | 8.377802000 | N                 | -0.628794000 | 8.763456000  | 9.974231000  |
| C | 2.589711000  | 10.201940000 | 7.997771000 | N                 | -0.930564000 | 8.009193000  | 7.406031000  |
| H | 2.632061000  | 9.472194000  | 8.795262000 | N                 | -0.787108000 | 10.955716000 | 6.443536000  |
| C | 1.506185000  | 10.998389000 | 6.124672000 | N                 | 1.336625000  | 10.175780000 | 7.887812000  |
| C | 0.429780000  | 10.812220000 | 5.216882000 | C                 | -0.515109000 | 9.156269000  | 11.238377000 |
| C | -3.695504000 | 8.490213000  | 7.891580000 | H                 | -0.409830000 | 10.223042000 | 11.404202000 |
| C | -4.270756000 | 7.372635000  | 8.683177000 |                   |              |              |              |

|   |              |              |              |    |              |              |              |
|---|--------------|--------------|--------------|----|--------------|--------------|--------------|
| C | -0.525367000 | 8.276471000  | 12.337959000 | C  | 2.889012000  | 11.162114000 | 6.312029000  |
| C | -0.405198000 | 8.854101000  | 13.724470000 | C  | 3.982450000  | 10.722311000 | 7.114370000  |
| H | -0.306645000 | 9.940811000  | 13.683610000 | C  | 5.389384000  | 11.027837000 | 6.683150000  |
| H | 0.469770000  | 8.456287000  | 14.247431000 | H  | 5.589470000  | 10.605492000 | 5.692979000  |
| H | -1.285743000 | 8.619755000  | 14.330697000 | H  | 6.127266000  | 10.628020000 | 7.375792000  |
| C | -0.648776000 | 6.906424000  | 12.093629000 | H  | 5.543608000  | 12.109593000 | 6.610376000  |
| C | -0.685746000 | 5.899473000  | 13.208140000 | C  | 3.706987000  | 10.014547000 | 8.288444000  |
| H | -1.610259000 | 5.314443000  | 13.162817000 | C  | 4.786016000  | 9.503072000  | 9.207562000  |
| H | -0.629711000 | 6.369557000  | 14.187964000 | H  | 4.350486000  | 8.985259000  | 10.064666000 |
| H | 0.148313000  | 5.195138000  | 13.121763000 | H  | 5.406203000  | 10.320381000 | 9.588036000  |
| C | -0.748468000 | 6.465841000  | 10.742144000 | H  | 5.447672000  | 8.800570000  | 8.691485000  |
| C | -0.856938000 | 5.084054000  | 10.367955000 | C  | 2.361368000  | 9.770711000  | 8.627101000  |
| H | -0.851133000 | 4.328186000  | 11.142265000 | H  | 2.114151000  | 9.229426000  | 9.534445000  |
| C | -0.978424000 | 4.703142000  | 9.063961000  | C  | 1.579544000  | 10.860181000 | 6.739934000  |
| H | -1.066049000 | 3.651073000  | 8.824759000  | C  | 0.442590000  | 11.278753000 | 5.967074000  |
| C | -1.011107000 | 5.666535000  | 8.001507000  | C  | -3.954339000 | 8.370668000  | 7.740028000  |
| C | -1.186527000 | 5.322661000  | 6.630305000  | C  | -4.245554000 | 6.951199000  | 8.043456000  |
| C | -1.332178000 | 3.879475000  | 6.239114000  | C  | -4.145786000 | 6.434539000  | 9.343837000  |
| H | -2.190307000 | 3.429988000  | 6.747977000  | C  | -4.355238000 | 5.074847000  | 9.536483000  |
| H | -0.444333000 | 3.308822000  | 6.530663000  | C  | -4.656658000 | 4.225144000  | 8.470312000  |
| H | -1.474634000 | 3.757780000  | 5.167238000  | C  | -4.759418000 | 4.756529000  | 7.183327000  |
| C | -1.228881000 | 6.351471000  | 5.684574000  | C  | -4.554738000 | 6.115802000  | 6.963043000  |
| C | -1.436052000 | 6.103805000  | 4.213165000  | O  | -4.027085000 | 8.915259000  | 6.666009000  |
| H | -2.393797000 | 5.607508000  | 4.027211000  | O  | -3.501163000 | 8.998935000  | 8.886738000  |
| H | -0.648797000 | 5.466932000  | 3.798648000  | Cl | -4.218837000 | 4.415084000  | 11.154685000 |
| H | -1.433791000 | 7.044981000  | 3.659662000  | H  | -3.900040000 | 7.070156000  | 10.183862000 |
| C | -1.088974000 | 7.679143000  | 6.130245000  | H  | -4.808175000 | 3.166652000  | 8.646398000  |
| H | -1.121233000 | 8.499922000  | 5.422780000  | H  | -4.994263000 | 4.101426000  | 6.351859000  |
| C | -0.889850000 | 7.029633000  | 8.343400000  | H  | -4.617969000 | 6.538490000  | 5.967792000  |
| C | -0.746630000 | 7.433234000  | 9.715223000  | O  | -2.952993000 | 10.285185000 | 8.538020000  |
| C | -1.861305000 | 11.299092000 | 5.742142000  | H  | -3.244895000 | 10.814458000 | 9.302613000  |
| H | -2.814933000 | 10.980907000 | 6.146678000  | Cl | -0.640113000 | 12.394085000 | 9.681797000  |
| C | -1.798050000 | 12.014568000 | 4.530757000  | C  | 0.439134000  | 13.537718000 | 8.776355000  |
| C | -3.089661000 | 12.352380000 | 3.831762000  | H  | 1.290151000  | 12.962079000 | 8.425993000  |
| H | -3.242905000 | 13.435155000 | 3.779418000  | H  | 0.725626000  | 14.306928000 | 9.487060000  |
| H | -3.939322000 | 11.921058000 | 4.364449000  | Cl | -0.373582000 | 14.293755000 | 7.391290000  |
| H | -3.103492000 | 11.967286000 | 2.807922000  | C  | -5.190506000 | 12.562674000 | 7.384565000  |
| C | -0.544663000 | 12.384215000 | 4.035488000  | C  | -6.199957000 | 13.235921000 | 6.444135000  |
| C | -0.394726000 | 13.167333000 | 2.761687000  | C  | -6.530075000 | 14.662648000 | 6.905202000  |
| H | 0.168185000  | 14.089042000 | 2.939871000  | C  | -5.258310000 | 15.508502000 | 7.059354000  |
| H | -1.357151000 | 13.438156000 | 2.331935000  | C  | -4.253016000 | 14.837004000 | 8.005276000  |
| H | 0.159287000  | 12.588407000 | 2.014979000  | C  | -3.923369000 | 13.414242000 | 7.537800000  |
| C | 0.616099000  | 11.994918000 | 4.766269000  | H  | -4.942076000 | 11.558170000 | 7.023769000  |
| C | 1.958388000  | 12.294485000 | 4.354388000  | H  | -5.653989000 | 12.431319000 | 8.373064000  |
| H | 2.116290000  | 12.846855000 | 3.436590000  | H  | -5.774803000 | 13.276619000 | 5.431259000  |
| C | 3.039157000  | 11.898985000 | 5.089028000  | H  | -7.114296000 | 12.635191000 | 6.375751000  |
| H | 4.034852000  | 12.144973000 | 4.742060000  | H  | -7.221439000 | 15.139210000 | 6.200582000  |

|                                 |              |              |              |    |              |              |              |
|---------------------------------|--------------|--------------|--------------|----|--------------|--------------|--------------|
| H                               | -7.049384000 | 14.615758000 | 7.872804000  | C  | -2.014228000 | 9.375449000  | 4.908632000  |
| H                               | -4.790291000 | 15.636562000 | 6.072754000  | H  | -2.712575000 | 8.657524000  | 5.312956000  |
| H                               | -5.509533000 | 16.512423000 | 7.420693000  | C  | -2.360802000 | 10.097279000 | 3.748386000  |
| H                               | -3.335100000 | 15.431730000 | 8.075235000  | C  | -3.689891000 | 9.797696000  | 3.105144000  |
| H                               | -4.681402000 | 14.794522000 | 9.016626000  | H  | -4.276853000 | 10.710551000 | 2.968986000  |
| H                               | -3.404295000 | 13.472908000 | 6.572378000  | H  | -4.270312000 | 9.115047000  | 3.728361000  |
| H                               | -3.217439000 | 12.945031000 | 8.231999000  | H  | -3.563218000 | 9.336217000  | 2.120239000  |
| <sup>1</sup> TS <sub>2+CH</sub> |              |              |              | C  | -1.473097000 | 11.053433000 | 3.249550000  |
|                                 |              |              |              | C  | -1.759840000 | 11.823008000 | 1.992082000  |
| Ni                              | -0.332807000 | 8.797141000  | 7.261830000  | H  | -2.034943000 | 12.858078000 | 2.227228000  |
| N                               | -0.124847000 | 8.285144000  | 9.109183000  | H  | -2.577574000 | 11.381828000 | 1.424700000  |
| N                               | -1.131130000 | 7.013464000  | 7.071642000  | H  | -0.878147000 | 11.860532000 | 1.346788000  |
| N                               | -0.882167000 | 9.568096000  | 5.578138000  | C  | -0.294538000 | 11.326153000 | 4.003466000  |
| N                               | 1.079751000  | 10.146551000 | 7.184741000  | C  | 0.658675000  | 12.353978000 | 3.687049000  |
| C                               | 0.202383000  | 9.046323000  | 10.149597000 | H  | 0.520760000  | 12.939464000 | 2.786616000  |
| H                               | 0.449646000  | 10.077485000 | 9.942138000  | C  | 1.724545000  | 12.619694000 | 4.501322000  |
| C                               | 0.228286000  | 8.577344000  | 11.477087000 | H  | 2.418807000  | 13.404050000 | 4.227359000  |
| C                               | 0.622178000  | 9.543950000  | 12.564251000 | C  | 1.942673000  | 11.890477000 | 5.720008000  |
| H                               | 0.868513000  | 10.520248000 | 12.143358000 | C  | 3.018606000  | 12.128132000 | 6.622164000  |
| H                               | 1.497327000  | 9.187122000  | 13.115278000 | C  | 4.008808000  | 13.218807000 | 6.333148000  |
| H                               | -0.189713000 | 9.682184000  | 13.284774000 | H  | 4.547735000  | 13.011912000 | 5.402125000  |
| C                               | -0.097741000 | 7.241203000  | 11.730618000 | H  | 4.741733000  | 13.330168000 | 7.129643000  |
| C                               | -0.065800000 | 6.659239000  | 13.113601000 | H  | 3.496388000  | 14.177490000 | 6.204472000  |
| H                               | -1.067822000 | 6.327837000  | 13.405272000 | C  | 3.118880000  | 11.311788000 | 7.752696000  |
| H                               | 0.284648000  | 7.375675000  | 13.853772000 | C  | 4.234889000  | 11.443006000 | 8.757508000  |
| H                               | 0.589683000  | 5.783209000  | 13.148795000 | H  | 4.131516000  | 10.699918000 | 9.550667000  |
| C                               | -0.505442000 | 6.431447000  | 10.632438000 | H  | 4.232971000  | 12.433176000 | 9.223916000  |
| C                               | -0.919753000 | 5.060388000  | 10.738263000 | H  | 5.212352000  | 11.301510000 | 8.287175000  |
| H                               | -0.883541000 | 4.573143000  | 11.703956000 | C  | 2.129556000  | 10.334973000 | 7.980917000  |
| C                               | -1.382525000 | 4.368522000  | 9.655544000  | H  | 2.208904000  | 9.695623000  | 8.849137000  |
| H                               | -1.695391000 | 3.339486000  | 9.779040000  | C  | 1.016885000  | 10.880643000 | 6.039471000  |
| C                               | -1.486125000 | 4.976228000  | 8.357951000  | C  | -0.066128000 | 10.577934000 | 5.172019000  |
| C                               | -2.011220000 | 4.328996000  | 7.205238000  | C  | -3.800898000 | 8.655411000  | 7.846169000  |
| C                               | -2.514966000 | 2.918964000  | 7.306606000  | C  | -4.135771000 | 7.394778000  | 8.610787000  |
| H                               | -3.281548000 | 2.845475000  | 8.083892000  | C  | -3.838218000 | 7.273980000  | 9.973395000  |
| H                               | -1.702720000 | 2.238815000  | 7.584523000  | C  | -4.180794000 | 6.097872000  | 10.630886000 |
| H                               | -2.945407000 | 2.567557000  | 6.371031000  | C  | -4.792715000 | 5.036036000  | 9.964588000  |
| C                               | -2.037847000 | 5.045076000  | 6.004725000  | C  | -5.080693000 | 5.171061000  | 8.605079000  |
| C                               | -2.565957000 | 4.460517000  | 4.720225000  | C  | -4.759293000 | 6.345903000  | 7.928155000  |
| H                               | -3.623827000 | 4.195993000  | 4.816561000  | O  | -4.317161000 | 8.876832000  | 6.750767000  |
| H                               | -2.022568000 | 3.553665000  | 4.439351000  | O  | -2.919324000 | 9.387356000  | 8.466847000  |
| H                               | -2.474143000 | 5.176124000  | 3.900809000  | Cl | -3.827561000 | 5.946438000  | 12.347473000 |
| C                               | -1.577065000 | 6.375624000  | 5.991468000  | H  | -3.358231000 | 8.088041000  | 10.500759000 |
| H                               | -1.579106000 | 6.926930000  | 5.061458000  | H  | -5.041935000 | 4.127205000  | 10.499705000 |
| C                               | -1.056609000 | 6.308865000  | 8.234716000  | H  | -5.561747000 | 4.353617000  | 8.078240000  |
| C                               | -0.535378000 | 7.013013000  | 9.352700000  | H  | -4.985911000 | 6.468635000  | 6.876062000  |
|                                 |              |              |              | O  | -2.797774000 | 11.090902000 | 7.599034000  |

|                                 |              |              |              |   |              |              |              |
|---------------------------------|--------------|--------------|--------------|---|--------------|--------------|--------------|
| H                               | -2.481931000 | 11.351000000 | 8.487256000  | C | -0.522922000 | 4.363362000  | 8.958807000  |
| Cl                              | 0.732971000  | 12.792286000 | 9.981969000  | H | -0.475255000 | 3.304615000  | 8.737568000  |
| C                               | -0.810620000 | 13.133823000 | 10.831635000 | C | -0.740347000 | 5.291357000  | 7.885207000  |
| H                               | -1.283689000 | 13.981995000 | 10.345747000 | C | -0.932836000 | 4.901620000  | 6.529017000  |
| H                               | -0.587620000 | 13.326934000 | 11.876611000 | C | -0.934168000 | 3.442622000  | 6.169810000  |
| Cl                              | -1.948809000 | 11.745435000 | 10.763040000 | H | -1.724965000 | 2.917722000  | 6.716250000  |
| C                               | -1.153311000 | 13.718901000 | 6.740312000  | H | 0.015848000  | 2.972897000  | 6.444293000  |
| C                               | -0.983335000 | 15.168093000 | 6.213303000  | H | -1.095766000 | 3.281430000  | 5.105876000  |
| C                               | -1.704183000 | 15.352756000 | 4.874651000  | C | -1.138589000 | 5.898122000  | 5.570293000  |
| C                               | -3.186323000 | 14.980984000 | 4.981247000  | C | -1.368388000 | 5.596465000  | 4.112243000  |
| C                               | -3.366269000 | 13.528257000 | 5.501880000  | H | -2.270892000 | 4.993340000  | 3.971289000  |
| C                               | -2.621736000 | 13.398813000 | 6.807513000  | H | -0.530247000 | 5.041536000  | 3.680141000  |
| H                               | -0.667582000 | 13.607196000 | 7.711716000  | H | -1.490103000 | 6.519341000  | 3.541470000  |
| H                               | -0.660473000 | 13.042876000 | 6.039689000  | C | -1.149653000 | 7.241351000  | 5.990060000  |
| H                               | -1.384353000 | 15.871901000 | 6.952536000  | H | -1.306907000 | 8.039414000  | 5.272316000  |
| H                               | 0.087785000  | 15.374959000 | 6.116602000  | C | -0.793039000 | 6.663572000  | 8.202360000  |
| H                               | -1.604766000 | 16.390473000 | 4.537767000  | C | -0.676242000 | 7.104149000  | 9.565387000  |
| H                               | -1.221793000 | 14.726114000 | 4.113421000  | C | -2.150885000 | 10.865513000 | 5.487394000  |
| H                               | -3.693801000 | 15.671770000 | 5.665116000  | H | -3.104658000 | 10.449733000 | 5.790013000  |
| H                               | -3.685579000 | 15.062985000 | 4.010078000  | C | -2.056509000 | 11.643712000 | 4.316628000  |
| H                               | -4.426486000 | 13.293489000 | 5.624845000  | C | -3.307675000 | 11.872586000 | 3.507357000  |
| H                               | -2.948635000 | 12.833925000 | 4.765594000  | H | -3.583184000 | 12.932190000 | 3.486865000  |
| H                               | -3.139391000 | 13.846126000 | 7.659982000  | H | -4.145271000 | 11.314608000 | 3.930780000  |
| H                               | -2.723625000 | 12.154766000 | 7.054009000  | H | -3.179777000 | 11.547566000 | 2.470610000  |
|                                 |              |              |              | C | -0.814431000 | 12.169960000 | 3.957092000  |
| <sup>3</sup> TS <sub>2+CH</sub> |              |              |              | C | -0.638433000 | 13.031932000 | 2.738455000  |
| Ni                              | -1.064358000 | 9.508647000  | 8.050073000  | H | -0.204109000 | 13.999538000 | 3.009607000  |
| N                               | -0.810125000 | 8.433863000  | 9.805416000  | H | -1.581968000 | 13.217724000 | 2.228945000  |
| N                               | -0.993359000 | 7.612051000  | 7.254586000  | H | 0.044824000  | 12.559180000 | 2.024819000  |
| N                               | -1.114612000 | 10.594991000 | 6.276190000  | C | 0.309397000  | 11.864508000 | 4.777697000  |
| N                               | 0.957770000  | 9.983084000  | 7.872191000  | C | 1.640283000  | 12.325835000 | 4.499723000  |
| C                               | -0.745129000 | 8.867177000  | 11.058876000 | H | 1.811389000  | 12.938692000 | 3.623565000  |
| H                               | -0.867860000 | 9.935065000  | 11.203466000 | C | 2.693311000  | 12.007414000 | 5.306733000  |
| C                               | -0.529144000 | 8.023454000  | 12.165556000 | H | 3.682165000  | 12.372291000 | 5.059053000  |
| C                               | -0.481492000 | 8.637670000  | 13.540696000 | C | 2.519791000  | 11.197429000 | 6.478611000  |
| H                               | -0.641379000 | 9.716631000  | 13.487170000 | C | 3.585404000  | 10.835597000 | 7.352993000  |
| H                               | 0.485940000  | 8.464976000  | 14.022574000 | C | 4.981250000  | 11.310135000 | 7.060739000  |
| H                               | -1.253156000 | 8.215387000  | 14.191689000 | H | 5.318208000  | 10.941150000 | 6.086246000  |
| C                               | -0.376689000 | 6.652700000  | 11.940114000 | H | 5.693818000  | 10.975880000 | 7.812175000  |
| C                               | -0.150126000 | 5.684191000  | 13.065803000 | H | 5.016946000  | 12.403757000 | 7.022055000  |
| H                               | -0.987871000 | 4.982365000  | 13.136108000 | C | 3.294214000  | 10.041368000 | 8.465983000  |
| H                               | -0.050160000 | 6.187361000  | 14.025517000 | C | 4.342848000  | 9.595678000  | 9.452322000  |
| H                               | 0.755733000  | 5.094209000  | 12.895149000 | H | 3.896951000  | 8.986321000  | 10.241331000 |
| C                               | -0.462628000 | 6.172333000  | 10.601806000 | H | 4.834756000  | 10.450829000 | 9.926057000  |
| C                               | -0.380672000 | 4.783206000  | 10.249156000 | H | 5.119399000  | 8.997846000  | 8.965348000  |
| H                               | -0.223621000 | 4.050689000  | 11.030530000 | C | 1.959673000  | 9.646474000  | 8.676802000  |
|                                 |              |              |              | H | 1.701040000  | 9.040125000  | 9.537630000  |



|                                  |              |              |              |   |              |              |              |
|----------------------------------|--------------|--------------|--------------|---|--------------|--------------|--------------|
| C                                | 1.218985000  | 10.740329000 | 6.777147000  | N | -0.765420000 | 9.431575000  | 5.381817000  |
| C                                | 0.109291000  | 11.070429000 | 5.925636000  | N | 1.141760000  | 10.119624000 | 7.038228000  |
| C                                | -3.966755000 | 8.619974000  | 7.650311000  | C | 0.262348000  | 9.080444000  | 10.056139000 |
| C                                | -4.013877000 | 7.232956000  | 8.206861000  | H | 0.518609000  | 10.097860000 | 9.799184000  |
| C                                | -3.841802000 | 6.991519000  | 9.575762000  | C | 0.310038000  | 8.669415000  | 11.401711000 |
| C                                | -3.884196000 | 5.677892000  | 10.031203000 | C | 0.742920000  | 9.675256000  | 12.437279000 |
| C                                | -4.066344000 | 4.606376000  | 9.156817000  | H | 0.989536000  | 10.630533000 | 11.970029000 |
| C                                | -4.237545000 | 4.864188000  | 7.794986000  | H | 1.628313000  | 9.331588000  | 12.980089000 |
| C                                | -4.221330000 | 6.171436000  | 7.317555000  | H | -0.048472000 | 9.851370000  | 13.172419000 |
| O                                | -4.488993000 | 8.927231000  | 6.593663000  | C | -0.030765000 | 7.351594000  | 11.719376000 |
| O                                | -3.258181000 | 9.456826000  | 8.426786000  | C | 0.042782000  | 6.823497000  | 13.121968000 |
| Cl                               | -3.695165000 | 5.361383000  | 11.748545000 | H | -0.941426000 | 6.474473000  | 13.449126000 |
| H                                | -3.683613000 | 7.813107000  | 10.261879000 | H | 0.388590000  | 7.576147000  | 13.827505000 |
| H                                | -4.078512000 | 3.591408000  | 9.535983000  | H | 0.724794000  | 5.968303000  | 13.173056000 |
| H                                | -4.384428000 | 4.036861000  | 7.109130000  | C | -0.482081000 | 6.504350000  | 10.667189000 |
| H                                | -4.355635000 | 6.383735000  | 6.263888000  | C | -0.929274000 | 5.152258000  | 10.849469000 |
| O                                | -3.808531000 | 11.152570000 | 7.979936000  | H | -0.897841000 | 4.718273000  | 11.840550000 |
| H                                | -3.274958000 | 11.481549000 | 8.734703000  | C | -1.413424000 | 4.413417000  | 9.808465000  |
| Cl                               | -1.701216000 | 12.389782000 | 10.312458000 | H | -1.749148000 | 3.400153000  | 9.988913000  |
| C                                | -0.209511000 | 12.964341000 | 9.473969000  | C | -1.500006000 | 4.948126000  | 8.477969000  |
| H                                | 0.410605000  | 12.094205000 | 9.283501000  | C | -2.025043000 | 4.239863000  | 7.361168000  |
| H                                | 0.270739000  | 13.681048000 | 10.133220000 | C | -2.554731000 | 2.847560000  | 7.542670000  |
| Cl                               | -0.560140000 | 13.763760000 | 7.918089000  | H | -3.306148000 | 2.824628000  | 8.337444000  |
| C                                | -5.463005000 | 13.506261000 | 6.270861000  | H | -1.749217000 | 2.166298000  | 7.837886000  |
| C                                | -5.551480000 | 14.938056000 | 5.681703000  | H | -3.009704000 | 2.459009000  | 6.633775000  |
| C                                | -5.618543000 | 15.988810000 | 6.795685000  | C | -2.019973000 | 4.876244000  | 6.116568000  |
| C                                | -4.431696000 | 15.864504000 | 7.756834000  | C | -2.537968000 | 4.219995000  | 4.863215000  |
| C                                | -4.335748000 | 14.435158000 | 8.349197000  | H | -3.603992000 | 3.988629000  | 4.954949000  |
| C                                | -4.270314000 | 13.454826000 | 7.201538000  | H | -2.012697000 | 3.283493000  | 4.654770000  |
| H                                | -5.372948000 | 12.769059000 | 5.469285000  | H | -2.412031000 | 4.876572000  | 4.000148000  |
| H                                | -6.381771000 | 13.289745000 | 6.827526000  | C | -1.530039000 | 6.192728000  | 6.026396000  |
| H                                | -4.671474000 | 15.121184000 | 5.052156000  | H | -1.499338000 | 6.679592000  | 5.061764000  |
| H                                | -6.430674000 | 14.995911000 | 5.031220000  | C | -1.046122000 | 6.263781000  | 8.280088000  |
| H                                | -5.641717000 | 16.993716000 | 6.359320000  | C | -0.519179000 | 7.023336000  | 9.361007000  |
| H                                | -6.554626000 | 15.864148000 | 7.355527000  | C | -1.847408000 | 9.157091000  | 4.657616000  |
| H                                | -3.498920000 | 16.092444000 | 7.225851000  | H | -2.503208000 | 8.380095000  | 5.019529000  |
| H                                | -4.516264000 | 16.581894000 | 8.579843000  | C | -2.207400000 | 9.862906000  | 3.491350000  |
| H                                | -3.456223000 | 14.355084000 | 8.992439000  | C | -3.477164000 | 9.457357000  | 2.787288000  |
| H                                | -5.224069000 | 14.237711000 | 8.960158000  | H | -4.124025000 | 10.320081000 | 2.606749000  |
| H                                | -3.315025000 | 13.487426000 | 6.670046000  | H | -4.035263000 | 8.740334000  | 3.391468000  |
| H                                | -4.281650000 | 12.320368000 | 7.635815000  | H | -3.261526000 | 8.996143000  | 1.817961000  |
|                                  |              |              |              | C | -1.381989000 | 10.899071000 | 3.043836000  |
|                                  |              |              |              | C | -1.686555000 | 11.675301000 | 1.795807000  |
|                                  |              |              |              | H | -1.984874000 | 12.699524000 | 2.047442000  |
|                                  |              |              |              | H | -2.490353000 | 11.221366000 | 1.219409000  |
|                                  |              |              |              | H | -0.802603000 | 11.741903000 | 1.155256000  |
|                                  |              |              |              | C | -0.249203000 | 11.240888000 | 3.838233000  |
| <sup>13</sup> PC <sub>2+CH</sub> |              |              |              |   |              |              |              |
| Ni                               | -0.241468000 | 8.700366000  | 7.142762000  |   |              |              |              |
| N                                | -0.093699000 | 8.279568000  | 9.054403000  |   |              |              |              |
| N                                | -1.089318000 | 6.891173000  | 7.070524000  |   |              |              |              |

|    |              |              |              |    |              |              |              |
|----|--------------|--------------|--------------|----|--------------|--------------|--------------|
| C  | 0.630301000  | 12.342247000 | 3.560075000  | H  | -0.969409000 | 12.910207000 | 5.721962000  |
| H  | 0.468484000  | 12.931135000 | 2.666157000  | H  | -1.310434000 | 14.754907000 | 8.135630000  |
| C  | 1.652845000  | 12.672989000 | 4.403796000  | H  | 0.149503000  | 14.571335000 | 7.171955000  |
| H  | 2.292386000  | 13.511663000 | 4.159235000  | H  | -1.184954000 | 16.595035000 | 6.475578000  |
| C  | 1.898334000  | 11.940202000 | 5.614537000  | H  | -1.033534000 | 15.430344000 | 5.162302000  |
| C  | 2.939097000  | 12.241630000 | 6.539310000  | H  | -3.462952000 | 15.764950000 | 7.001415000  |
| C  | 3.845003000  | 13.411898000 | 6.288817000  | H  | -3.383853000 | 16.235331000 | 5.308377000  |
| H  | 4.405700000  | 13.273211000 | 5.358167000  | H  | -4.557197000 | 14.025303000 | 5.596153000  |
| H  | 4.560372000  | 13.556738000 | 7.095732000  | H  | -3.092571000 | 13.866849000 | 4.621049000  |
| H  | 3.260462000  | 14.331274000 | 6.181756000  | H  | -3.361720000 | 13.180016000 | 7.585230000  |
| C  | 3.085697000  | 11.413395000 | 7.655635000  | H  | -3.041017000 | 11.547143000 | 5.293929000  |
| C  | 4.174765000  | 11.605790000 | 8.679699000  |    |              |              |              |
| H  | 4.113050000  | 10.842723000 | 9.457992000  |    |              |              |              |
| H  | 4.094800000  | 12.584476000 | 9.163157000  |    |              |              |              |
| H  | 5.166502000  | 11.543522000 | 8.222314000  | Ni | -1.389105000 | 9.753079000  | 7.464125000  |
| C  | 2.164506000  | 10.366469000 | 7.853129000  | N  | -1.323589000 | 9.036196000  | 9.391252000  |
| H  | 2.273779000  | 9.719573000  | 8.712756000  | N  | -1.080750000 | 7.761326000  | 7.042187000  |
| C  | 1.042559000  | 10.861571000 | 5.900309000  | N  | -1.322221000 | 10.507793000 | 5.531039000  |
| C  | -0.001232000 | 10.495758000 | 5.006035000  | N  | 0.602636000  | 10.313084000 | 7.392017000  |
| C  | -3.988430000 | 8.665542000  | 7.408738000  | C  | -1.490265000 | 9.689350000  | 10.534569000 |
| C  | -4.177895000 | 7.565661000  | 8.394451000  | H  | -1.713187000 | 10.747458000 | 10.452801000 |
| C  | -3.816217000 | 7.725981000  | 9.738557000  | C  | -1.388500000 | 9.082083000  | 11.800691000 |
| C  | -4.045507000 | 6.676204000  | 10.620345000 | C  | -1.605617000 | 9.931485000  | 13.025961000 |
| C  | -4.612905000 | 5.473314000  | 10.197458000 | H  | -1.843178000 | 10.959818000 | 12.745639000 |
| C  | -4.964636000 | 5.327232000  | 8.854809000  | H  | -0.713809000 | 9.954042000  | 13.660048000 |
| C  | -4.749515000 | 6.367075000  | 7.953814000  | H  | -2.431709000 | 9.549126000  | 13.633159000 |
| O  | -4.324677000 | 8.568466000  | 6.233669000  | C  | -1.096596000 | 7.716182000  | 11.862839000 |
| O  | -3.413442000 | 9.751297000  | 7.920658000  | C  | -0.970324000 | 6.991028000  | 13.172185000 |
| Cl | -3.617352000 | 6.873944000  | 12.313073000 | H  | -1.751973000 | 6.229007000  | 13.260659000 |
| H  | -3.377147000 | 8.653512000  | 10.081910000 | H  | -1.056407000 | 7.663305000  | 14.023542000 |
| H  | -4.777637000 | 4.670791000  | 10.906665000 | H  | -0.006158000 | 6.477614000  | 13.240261000 |
| H  | -5.411227000 | 4.398054000  | 8.517820000  | C  | -0.940591000 | 6.998623000  | 10.641534000 |
| H  | -5.022731000 | 6.270313000  | 6.909977000  | C  | -0.707108000 | 5.583575000  | 10.571953000 |
| O  | -3.342666000 | 11.719887000 | 6.196926000  | H  | -0.614970000 | 5.020835000  | 11.492029000 |
| H  | -3.358298000 | 10.474415000 | 7.223921000  | C  | -0.629460000 | 4.928857000  | 9.377163000  |
| Cl | 0.673917000  | 12.809643000 | 9.918458000  | H  | -0.474393000 | 3.857371000  | 9.369460000  |
| C  | -0.966492000 | 12.893022000 | 10.655765000 | C  | -0.753688000 | 5.624987000  | 8.127209000  |
| H  | -1.384220000 | 13.867369000 | 10.420190000 | C  | -0.720100000 | 4.984669000  | 6.855443000  |
| H  | -0.859760000 | 12.741048000 | 11.725832000 | C  | -0.568844000 | 3.491733000  | 6.780353000  |
| Cl | -2.064721000 | 11.636240000 | 10.009786000 | H  | -1.388781000 | 2.999460000  | 7.314025000  |
| C  | -1.395640000 | 13.130320000 | 6.706025000  | H  | 0.365076000  | 3.170641000  | 7.253010000  |
| C  | -0.943831000 | 14.535345000 | 7.123853000  | H  | -0.569787000 | 3.130389000  | 5.753988000  |
| C  | -1.483271000 | 15.592053000 | 6.151664000  | C  | -0.852124000 | 5.771589000  | 5.707121000  |
| C  | -3.011241000 | 15.505424000 | 6.034574000  | C  | -0.846206000 | 5.196195000  | 4.314794000  |
| C  | -3.465178000 | 14.093894000 | 5.631119000  | H  | -1.678679000 | 4.499795000  | 4.171949000  |
| C  | -2.914989000 | 13.044465000 | 6.594631000  | H  | 0.079396000  | 4.650104000  | 4.109653000  |
| H  | -1.032954000 | 12.371158000 | 7.404130000  | H  | -0.941371000 | 5.988497000  | 3.569343000  |

|    |              |              |              |    |              |              |              |
|----|--------------|--------------|--------------|----|--------------|--------------|--------------|
| C  | -1.022051000 | 7.160051000  | 5.860574000  | H  | -4.158368000 | 3.812266000  | 9.470173000  |
| H  | -1.132899000 | 7.798190000  | 4.990066000  | H  | -4.189702000 | 3.834157000  | 6.985557000  |
| C  | -0.947681000 | 7.019964000  | 8.169281000  | H  | -4.228862000 | 6.007287000  | 5.762392000  |
| C  | -1.061563000 | 7.705050000  | 9.427894000  | O  | -4.290625000 | 11.866258000 | 6.883392000  |
| C  | -2.293503000 | 10.605355000 | 4.627733000  | H  | -3.970689000 | 10.412049000 | 7.145538000  |
| H  | -3.267615000 | 10.232157000 | 4.919215000  | Cl | -0.094437000 | 12.996078000 | 9.618351000  |
| C  | -2.110978000 | 11.140113000 | 3.337846000  | C  | 0.656087000  | 13.796724000 | 8.198334000  |
| C  | -3.299777000 | 11.197100000 | 2.412956000  | H  | 1.506608000  | 13.196330000 | 7.888868000  |
| H  | -3.524739000 | 12.226226000 | 2.116087000  | H  | 0.951258000  | 14.797746000 | 8.498302000  |
| H  | -4.186622000 | 10.787263000 | 2.900634000  | Cl | -0.467037000 | 13.937004000 | 6.810906000  |
| H  | -3.122927000 | 10.622286000 | 1.498619000  | C  | -4.121522000 | 14.145882000 | 7.766187000  |
| C  | -0.841531000 | 11.593383000 | 2.974026000  | C  | -3.637593000 | 14.995636000 | 8.951293000  |
| C  | -0.565087000 | 12.180674000 | 1.618620000  | C  | -4.249266000 | 14.514845000 | 10.274073000 |
| H  | -0.206787000 | 13.211379000 | 1.711121000  | C  | -3.965307000 | 13.025232000 | 10.507809000 |
| H  | -1.451248000 | 12.187669000 | 0.987042000  | C  | -4.448253000 | 12.172933000 | 9.324466000  |
| H  | 0.214985000  | 11.612012000 | 1.101983000  | C  | -3.838168000 | 12.669040000 | 8.014322000  |
| C  | 0.210848000  | 11.490292000 | 3.929285000  | H  | -3.636261000 | 14.458464000 | 6.836067000  |
| C  | 1.554835000  | 11.927714000 | 3.675953000  | H  | -5.204508000 | 14.281756000 | 7.634791000  |
| H  | 1.794743000  | 12.353881000 | 2.709877000  | H  | -2.544044000 | 14.932442000 | 9.012746000  |
| C  | 2.533649000  | 11.822850000 | 4.620548000  | H  | -3.883520000 | 16.047610000 | 8.773866000  |
| H  | 3.533980000  | 12.166998000 | 4.389782000  | H  | -3.858175000 | 15.108226000 | 11.107588000 |
| C  | 2.266247000  | 11.268551000 | 5.917315000  | H  | -5.335543000 | 14.675571000 | 10.251942000 |
| C  | 3.248262000  | 11.148183000 | 6.944278000  | H  | -2.884481000 | 12.884288000 | 10.638836000 |
| C  | 4.656330000  | 11.605865000 | 6.684968000  | H  | -4.442351000 | 12.679124000 | 11.430494000 |
| H  | 5.088304000  | 11.061230000 | 5.839074000  | H  | -4.195165000 | 11.118477000 | 9.475809000  |
| H  | 5.301682000  | 11.455051000 | 7.548077000  | H  | -5.542659000 | 12.236256000 | 9.250038000  |
| H  | 4.676007000  | 12.670159000 | 6.428652000  | H  | -2.755709000 | 12.512993000 | 8.027509000  |
| C  | 2.862939000  | 10.605719000 | 8.174538000  | H  | -5.242837000 | 12.006847000 | 6.764500000  |
| C  | 3.812552000  | 10.441484000 | 9.332865000  |    |              |              |              |
| H  | 3.299986000  | 10.002583000 | 10.191430000 |    |              |              |              |
| H  | 4.228444000  | 11.404019000 | 9.646227000  |    |              |              |              |
| H  | 4.651530000  | 9.788962000  | 9.072503000  | Ni | -0.036487000 | 10.703312000 | 7.661109000  |
| C  | 1.523819000  | 10.202436000 | 8.340209000  | N  | -0.246375000 | 9.834105000  | 9.378751000  |
| H  | 1.195076000  | 9.785974000  | 9.285556000  | N  | -0.627591000 | 8.856614000  | 6.924871000  |
| C  | 0.952372000  | 10.831714000 | 6.189495000  | N  | 0.164892000  | 11.560404000 | 5.945465000  |
| C  | -0.078520000 | 10.940683000 | 5.194769000  | N  | 1.846600000  | 10.182338000 | 7.413779000  |
| C  | -4.177007000 | 8.460882000  | 6.807915000  | C  | -0.093142000 | 10.386873000 | 10.578453000 |
| C  | -4.161374000 | 7.184385000  | 7.559464000  | H  | 0.219398000  | 11.422507000 | 10.602181000 |
| C  | -4.136528000 | 7.181409000  | 8.960561000  | C  | -0.318381000 | 9.680042000  | 11.772784000 |
| C  | -4.157215000 | 5.960081000  | 9.625051000  | C  | -0.112649000 | 10.405123000 | 13.077322000 |
| C  | -4.162161000 | 4.750895000  | 8.928662000  | H  | 0.180701000  | 11.441692000 | 12.901508000 |
| C  | -4.182348000 | 4.770509000  | 7.532565000  | H  | 0.670369000  | 9.929052000  | 13.675272000 |
| C  | -4.200650000 | 5.980899000  | 6.845235000  | H  | -1.029110000 | 10.411381000 | 13.674641000 |
| O  | -4.623780000 | 8.595945000  | 5.685481000  | C  | -0.724452000 | 8.342211000  | 11.698878000 |
| O  | -3.629657000 | 9.504300000  | 7.494861000  | C  | -0.989880000 | 7.527471000  | 12.931287000 |
| Cl | -4.179482000 | 5.941248000  | 11.380507000 | H  | -2.028324000 | 7.180377000  | 12.943533000 |
| H  | -4.115252000 | 8.113158000  | 9.510161000  | H  | -0.811219000 | 8.092549000  | 13.843485000 |

<sup>3</sup>4+CH

|   |              |              |              |                                 |              |              |              |
|---|--------------|--------------|--------------|---------------------------------|--------------|--------------|--------------|
| H | -0.350494000 | 6.639024000  | 12.950082000 | H                               | 5.688709000  | 8.897296000  | 9.133142000  |
| C | -0.895588000 | 7.751787000  | 10.413475000 | H                               | 5.139925000  | 7.410385000  | 8.354058000  |
| C | -1.317922000 | 6.395459000  | 10.197728000 | C                               | 2.651534000  | 9.471896000  | 8.195954000  |
| H | -1.512417000 | 5.764804000  | 11.055875000 | H                               | 2.244260000  | 9.135955000  | 9.141604000  |
| C | -1.482825000 | 5.884832000  | 8.941904000  | C                               | 2.315131000  | 10.624073000 | 6.216082000  |
| H | -1.808788000 | 4.858939000  | 8.825831000  | C                               | 1.404451000  | 11.372626000 | 5.423025000  |
| C | -1.254037000 | 6.681266000  | 7.768864000  | O                               | -1.603297000 | 11.448446000 | 7.890278000  |
| C | -1.463722000 | 6.227790000  | 6.434010000  | Cl                              | 1.227751000  | 13.155429000 | 8.672902000  |
| C | -1.939017000 | 4.823758000  | 6.193389000  | C                               | -0.275920000 | 14.085942000 | 9.047642000  |
| H | -2.943602000 | 4.687633000  | 6.609764000  | H                               | -1.091089000 | 13.556229000 | 8.560795000  |
| H | -1.282159000 | 4.099931000  | 6.684820000  | H                               | -0.131655000 | 15.098282000 | 8.683209000  |
| H | -1.978937000 | 4.580555000  | 5.133696000  | Cl                              | -0.605489000 | 14.141280000 | 10.801377000 |
| C | -1.252253000 | 7.126147000  | 5.382769000  | C                               | -4.552586000 | 9.359120000  | 6.200263000  |
| C | -1.479846000 | 6.762084000  | 3.939197000  | C                               | -5.306308000 | 8.033167000  | 6.374701000  |
| H | -2.517891000 | 6.460448000  | 3.769151000  | C                               | -4.875222000 | 7.305060000  | 7.655298000  |
| H | -0.838626000 | 5.930529000  | 3.631584000  | C                               | -5.002102000 | 8.201397000  | 8.895180000  |
| H | -1.265952000 | 7.611240000  | 3.287297000  | C                               | -4.259384000 | 9.532179000  | 8.709159000  |
| C | -0.826099000 | 8.436217000  | 5.685525000  | C                               | -4.708101000 | 10.257830000 | 7.434334000  |
| H | -0.653891000 | 9.154046000  | 4.891039000  | H                               | -4.904248000 | 9.879884000  | 5.301690000  |
| C | -0.836447000 | 8.012128000  | 7.959346000  | H                               | -3.485727000 | 9.149860000  | 6.042772000  |
| C | -0.649029000 | 8.540581000  | 9.273748000  | H                               | -6.384669000 | 8.239185000  | 6.422625000  |
| C | -0.747581000 | 12.236918000 | 5.256618000  | H                               | -5.148166000 | 7.387354000  | 5.502498000  |
| H | -1.721866000 | 12.347073000 | 5.721710000  | H                               | -5.462067000 | 6.388529000  | 7.787964000  |
| C | -0.480218000 | 12.784242000 | 3.987437000  | H                               | -3.830160000 | 6.993950000  | 7.549882000  |
| C | -1.583578000 | 13.534560000 | 3.287563000  | H                               | -6.064883000 | 8.407903000  | 9.083083000  |
| H | -1.294318000 | 14.571551000 | 3.092267000  | H                               | -4.621658000 | 7.675902000  | 9.779381000  |
| H | -2.489923000 | 13.546917000 | 3.895631000  | H                               | -4.404794000 | 10.174382000 | 9.586031000  |
| H | -1.827992000 | 13.071854000 | 2.326738000  | H                               | -3.181832000 | 9.340158000  | 8.640044000  |
| C | 0.792485000  | 12.609783000 | 3.426427000  | H                               | -5.762871000 | 10.549872000 | 7.535797000  |
| C | 1.146991000  | 13.163916000 | 2.077308000  | H                               | -4.128654000 | 11.178093000 | 7.307984000  |
| H | 2.017297000  | 13.823925000 | 2.150278000  |                                 |              |              |              |
| H | 0.328880000  | 13.729107000 | 1.636176000  | <sup>3</sup> TS <sub>4+CH</sub> |              |              |              |
| H | 1.411395000  | 12.353640000 | 1.389474000  | Ni                              | -0.184833000 | 10.487298000 | 7.221958000  |
| C | 1.768337000  | 11.877978000 | 4.163963000  | N                               | -0.484132000 | 9.512322000  | 8.919907000  |
| C | 3.107504000  | 11.605858000 | 3.717876000  | N                               | -0.556205000 | 8.624782000  | 6.400307000  |
| H | 3.424814000  | 11.979438000 | 2.752459000  | N                               | 0.197299000  | 11.462263000 | 5.559913000  |
| C | 3.986049000  | 10.886900000 | 4.479600000  | N                               | 1.797217000  | 10.176802000 | 7.222185000  |
| H | 4.985085000  | 10.704528000 | 4.104079000  | C                               | -0.421240000 | 9.991473000  | 10.157429000 |
| C | 3.620438000  | 10.363049000 | 5.767816000  | H                               | -0.155117000 | 11.035460000 | 10.259476000 |
| C | 4.479546000  | 9.603033000  | 6.613287000  | C                               | -0.698276000 | 9.214385000  | 11.297564000 |
| C | 5.882185000  | 9.304497000  | 6.169880000  | C                               | -0.611924000 | 9.874049000  | 12.649229000 |
| H | 5.875788000  | 8.745368000  | 5.228449000  | H                               | -0.312919000 | 10.919326000 | 12.550749000 |
| H | 6.431868000  | 8.721799000  | 6.905965000  | H                               | 0.118095000  | 9.372147000  | 13.291305000 |
| H | 6.432584000  | 10.233978000 | 5.990667000  | H                               | -1.577857000 | 9.847807000  | 13.162745000 |
| C | 3.978373000  | 9.156059000  | 7.841917000  | C                               | -1.069319000 | 7.876643000  | 11.124793000 |
| C | 4.800881000  | 8.345511000  | 8.809879000  | C                               | -1.420712000 | 6.995327000  | 12.288762000 |
| H | 4.218977000  | 8.094782000  | 9.698755000  |                                 |              |              |              |

|   |              |              |              |                                 |              |              |              |
|---|--------------|--------------|--------------|---------------------------------|--------------|--------------|--------------|
| H | -2.453111000 | 6.640644000  | 12.199691000 | C                               | 4.711642000  | 8.589796000  | 8.971179000  |
| H | -1.322731000 | 7.514484000  | 13.239846000 | H                               | 4.036896000  | 8.218761000  | 9.745282000  |
| H | -0.774961000 | 6.111788000  | 12.315215000 | H                               | 5.468620000  | 9.213956000  | 9.455778000  |
| C | -1.128159000 | 7.353909000  | 9.800191000  | H                               | 5.225307000  | 7.729223000  | 8.532024000  |
| C | -1.502954000 | 6.003307000  | 9.485968000  | C                               | 2.559334000  | 9.512462000  | 8.082217000  |
| H | -1.754762000 | 5.327785000  | 10.293597000 | H                               | 2.058757000  | 9.074452000  | 8.937335000  |
| C | -1.550167000 | 5.552934000  | 8.197423000  | C                               | 2.379919000  | 10.739566000 | 6.131215000  |
| H | -1.840770000 | 4.527630000  | 8.005772000  | C                               | 1.515807000  | 11.434815000 | 5.236038000  |
| C | -1.225721000 | 6.405523000  | 7.088176000  | O                               | -1.871981000 | 11.109610000 | 7.140881000  |
| C | -1.267572000 | 5.996045000  | 5.723686000  | Cl                              | 0.551508000  | 12.981542000 | 8.488213000  |
| C | -1.658415000 | 4.585424000  | 5.383284000  | C                               | -1.129801000 | 13.619733000 | 8.687069000  |
| H | -2.663762000 | 4.363961000  | 5.756311000  | H                               | -1.754048000 | 12.983558000 | 8.060240000  |
| H | -0.973700000 | 3.871368000  | 5.852486000  | H                               | -1.116115000 | 14.666475000 | 8.399853000  |
| H | -1.650142000 | 4.405258000  | 4.310225000  | Cl                              | -1.697224000 | 13.490761000 | 10.376502000 |
| C | -0.945681000 | 6.933043000  | 4.736651000  | C                               | -4.216289000 | 8.783856000  | 7.658692000  |
| C | -0.959505000 | 6.608539000  | 3.265347000  | C                               | -5.561408000 | 8.256667000  | 8.228790000  |
| H | -1.954547000 | 6.292700000  | 2.937027000  | C                               | -5.553202000 | 8.289986000  | 9.760892000  |
| H | -0.262545000 | 5.798278000  | 3.030372000  | C                               | -5.262830000 | 9.698863000  | 10.289350000 |
| H | -0.671893000 | 7.480383000  | 2.674239000  | C                               | -3.917857000 | 10.233067000 | 9.725128000  |
| C | -0.599225000 | 8.241252000  | 5.134058000  | C                               | -3.970994000 | 10.159144000 | 8.222694000  |
| H | -0.356409000 | 8.993742000  | 4.391217000  | H                               | -4.237915000 | 8.796407000  | 6.565537000  |
| C | -0.858446000 | 7.735544000  | 7.373022000  | H                               | -3.425574000 | 8.097008000  | 7.973771000  |
| C | -0.816789000 | 8.210483000  | 8.724780000  | H                               | -6.382883000 | 8.875030000  | 7.847279000  |
| C | -0.660654000 | 12.089777000 | 4.766394000  | H                               | -5.723008000 | 7.239058000  | 7.857469000  |
| H | -1.694962000 | 12.072065000 | 5.091904000  | H                               | -6.516471000 | 7.937632000  | 10.146561000 |
| C | -0.263113000 | 12.740320000 | 3.581476000  | H                               | -4.787725000 | 7.596155000  | 10.134626000 |
| C | -1.320586000 | 13.422418000 | 2.752108000  | H                               | -6.072328000 | 10.379386000 | 9.999098000  |
| H | -1.121864000 | 14.494489000 | 2.658200000  | H                               | -5.209372000 | 9.707029000  | 11.383260000 |
| H | -2.305346000 | 13.302010000 | 3.207553000  | H                               | -3.731434000 | 11.253288000 | 10.069835000 |
| H | -1.363331000 | 13.005072000 | 1.741471000  | H                               | -3.115985000 | 9.595958000  | 10.107527000 |
| C | 1.090064000  | 12.728649000 | 3.223735000  | H                               | -4.581146000 | 10.940462000 | 7.760845000  |
| C | 1.587446000  | 13.401121000 | 1.976141000  | H                               | -2.796373000 | 10.533290000 | 7.791299000  |
| H | 2.339799000  | 14.157784000 | 2.221433000  |                                 |              |              |              |
| H | 0.786006000  | 13.887707000 | 1.424131000  | <sup>3</sup> PC <sub>4+CH</sub> |              |              |              |
| H | 2.065018000  | 12.673158000 | 1.311854000  | Ni                              | -0.209302000 | 10.339630000 | 7.855576000  |
| C | 2.012985000  | 12.054540000 | 4.075478000  | N                               | -0.201715000 | 9.168202000  | 9.569938000  |
| C | 3.426184000  | 11.956643000 | 3.833877000  | N                               | -0.660632000 | 8.525571000  | 6.995786000  |
| H | 3.841217000  | 12.422092000 | 2.948622000  | N                               | -0.071214000 | 11.441765000 | 6.106997000  |
| C | 4.256461000  | 11.291121000 | 4.691134000  | N                               | 1.823030000  | 10.149503000 | 7.499459000  |
| H | 5.315475000  | 11.241071000 | 4.470676000  | C                               | 0.032937000  | 9.505169000  | 10.833402000 |
| C | 3.761369000  | 10.652635000 | 5.879616000  | H                               | 0.246521000  | 10.551879000 | 11.019023000 |
| C | 4.571388000  | 9.942273000  | 6.811953000  | C                               | 0.015095000  | 8.593287000  | 11.906193000 |
| C | 6.050668000  | 9.829977000  | 6.577032000  | C                               | 0.294760000  | 9.109147000  | 13.294174000 |
| H | 6.250922000  | 9.320199000  | 5.628751000  | H                               | 0.487812000  | 10.183682000 | 13.274894000 |
| H | 6.552218000  | 9.278475000  | 7.369600000  | H                               | 1.168573000  | 8.618365000  | 13.733858000 |
| H | 6.506479000  | 10.823454000 | 6.513169000  | H                               | -0.553088000 | 8.932320000  | 13.963182000 |
| C | 3.951910000  | 9.365024000  | 7.925698000  |                                 |              |              |              |

|   |              |              |              |    |              |              |              |
|---|--------------|--------------|--------------|----|--------------|--------------|--------------|
| C | -0.266138000 | 7.251940000  | 11.635090000 | H  | 6.342319000  | 10.813868000 | 6.001064000  |
| C | -0.313374000 | 6.215952000  | 12.722908000 | C  | 4.077611000  | 9.354090000  | 7.816750000  |
| H | -1.300485000 | 5.743660000  | 12.763104000 | C  | 5.014231000  | 8.590695000  | 8.717403000  |
| H | -0.103671000 | 6.641575000  | 13.702149000 | H  | 4.490783000  | 8.240865000  | 9.609747000  |
| H | 0.417673000  | 5.422755000  | 12.534857000 | H  | 5.852772000  | 9.213947000  | 9.042939000  |
| C | -0.515653000 | 6.872336000  | 10.284329000 | H  | 5.432119000  | 7.716131000  | 8.209164000  |
| C | -0.819101000 | 5.527281000  | 9.883391000  | C  | 2.733354000  | 9.498245000  | 8.211642000  |
| H | -0.860726000 | 4.750662000  | 10.636723000 | H  | 2.392518000  | 9.064714000  | 9.145569000  |
| C | -1.060996000 | 5.205626000  | 8.579686000  | C  | 2.192507000  | 10.710266000 | 6.321189000  |
| H | -1.291081000 | 4.179871000  | 8.320245000  | C  | 1.179120000  | 11.407167000 | 5.577480000  |
| C | -1.019692000 | 6.196131000  | 7.541614000  | O  | -2.221408000 | 10.878138000 | 8.187349000  |
| C | -1.282930000 | 5.912369000  | 6.169974000  | Cl | 0.475314000  | 12.630867000 | 9.130037000  |
| C | -1.624450000 | 4.509458000  | 5.752187000  | C  | -1.073268000 | 13.496950000 | 9.469831000  |
| H | -2.520995000 | 4.159215000  | 6.274158000  | H  | -1.682146000 | 13.433648000 | 8.573650000  |
| H | -0.811572000 | 3.821673000  | 6.007435000  | H  | -0.816987000 | 14.516317000 | 9.741361000  |
| H | -1.806262000 | 4.433499000  | 4.681971000  | Cl | -1.977525000 | 12.750884000 | 10.819057000 |
| C | -1.217902000 | 6.961134000  | 5.248659000  | C  | -3.902976000 | 9.075169000  | 8.159694000  |
| C | -1.481014000 | 6.777699000  | 3.776456000  | C  | -5.101363000 | 8.510800000  | 7.381142000  |
| H | -2.495191000 | 6.407642000  | 3.596861000  | C  | -6.202113000 | 9.565559000  | 7.212674000  |
| H | -0.785126000 | 6.059316000  | 3.332430000  | C  | -5.655547000 | 10.840535000 | 6.556643000  |
| H | -1.370779000 | 7.724599000  | 3.243717000  | C  | -4.451341000 | 11.397118000 | 7.333449000  |
| C | -0.896960000 | 8.248586000  | 5.720632000  | C  | -3.372151000 | 10.328533000 | 7.473753000  |
| H | -0.837833000 | 9.081928000  | 5.028383000  | H  | -3.112217000 | 8.327549000  | 8.244875000  |
| C | -0.713481000 | 7.523944000  | 7.908450000  | H  | -4.217109000 | 9.337612000  | 9.179799000  |
| C | -0.468564000 | 7.866508000  | 9.283828000  | H  | -4.758012000 | 8.176000000  | 6.393000000  |
| C | -1.019036000 | 12.101366000 | 5.451682000  | H  | -5.488597000 | 7.625827000  | 7.895882000  |
| H | -1.997406000 | 12.120364000 | 5.916280000  | H  | -7.026314000 | 9.159632000  | 6.616676000  |
| C | -0.815081000 | 12.755945000 | 4.222055000  | H  | -6.616045000 | 9.815171000  | 8.198778000  |
| C | -1.980986000 | 13.461653000 | 3.578958000  | H  | -5.344686000 | 10.615735000 | 5.527483000  |
| H | -1.778623000 | 14.529094000 | 3.448261000  | H  | -6.435483000 | 11.605544000 | 6.489767000  |
| H | -2.879076000 | 13.363762000 | 4.192535000  | H  | -4.041544000 | 12.282615000 | 6.835559000  |
| H | -2.203368000 | 13.045569000 | 2.591482000  | H  | -4.767723000 | 11.711138000 | 8.336868000  |
| C | 0.460193000  | 12.718161000 | 3.652138000  | H  | -2.976932000 | 10.067195000 | 6.488395000  |
| C | 0.763108000  | 13.384391000 | 2.339218000  | H  | -2.444783000 | 10.938820000 | 9.130207000  |
| H | 1.535830000  | 14.150262000 | 2.464204000  |    |              |              |              |
| H | -0.115607000 | 13.860416000 | 1.908474000  |    |              |              |              |
| H | 1.143288000  | 12.656421000 | 1.615194000  |    |              |              |              |
| C | 1.493228000  | 12.028085000 | 4.349896000  |    |              |              |              |
| C | 2.843944000  | 11.927625000 | 3.872750000  |    |              |              |              |
| H | 3.105689000  | 12.394780000 | 2.931568000  |    |              |              |              |
| C | 3.804057000  | 11.260411000 | 4.576591000  |    |              |              |              |
| H | 4.811125000  | 11.208967000 | 4.181791000  |    |              |              |              |
| C | 3.513047000  | 10.627268000 | 5.832031000  |    |              |              |              |
| C | 4.481538000  | 9.925490000  | 6.607035000  |    |              |              |              |
| C | 5.897157000  | 9.819495000  | 6.112430000  |    |              |              |              |
| H | 5.928354000  | 9.338972000  | 5.129241000  |    |              |              |              |
| H | 6.525457000  | 9.243462000  | 6.788982000  |    |              |              |              |
